1 **Title**

2 Predictors of human-infective RNA virus discovery in the United States, China and Africa,  
3 an ecological study

4 **Authors**

5 Feifei Zhang <sup>1\*</sup>, Margo Chase-Topping <sup>1,2</sup>, Chuan-Guo Guo <sup>3</sup>, Mark E.J. Woolhouse <sup>1</sup>

6 <sup>1</sup>Usher Institute, University of Edinburgh, Edinburgh, United Kingdom

7 <sup>2</sup>Roslin Institute and Royal (Dick) School of Veterinary Studies, University of Edinburgh,  
8 Edinburgh, United Kingdom

9 <sup>3</sup>Department of Medicine, Li Ka Shing Faculty of Medicine, University of Hong Kong, Hong  
10 Kong, China

11 \*Feifei.Zhang@ed.ac.uk

## 12 **Abstract**

13 **Background** The variation in the pathogen type as well as the spatial heterogeneity of  
14 predictors make the generality of any associations with pathogen discovery debatable. Our  
15 previous work confirmed that the association of a group of predictors differed across different  
16 types of RNA viruses, yet there have been no previous comparisons of the specific predictors  
17 for RNA virus discovery in different regions. The aim of the current study was to close the  
18 gap by investigating whether predictors of discovery rates within three regions—the United  
19 States, China and Africa—differ from one another and from those at the global level.

20 **Methods** Based on a comprehensive list of human-infective RNA viruses, we collated  
21 published data on first discovery of each species in each region. We used a Poisson boosted  
22 regression tree (BRT) model to examine the relationship between virus discovery and 33  
23 predictors representing climate, socio-economics, land use, and biodiversity across each  
24 region separately. The discovery probability in three regions in 2010–2019 was mapped using  
25 the fitted models and historical predictors.

26 **Results** The numbers of human-infective virus species discovered in the United States, China  
27 and Africa up to 2019 were 95, 80 and 107 respectively, with China lagging behind the other  
28 two regions. In each region, discoveries were clustered in hotspots. BRT modelling suggested  
29 that in all three regions RNA virus discovery was best predicted by land use and socio-  
30 economic variables, followed by climatic variables and biodiversity, though the relative  
31 importance of these predictors varied by region. Map of virus discovery probability in 2010–  
32 2019 indicated several new hotspots outside historical high-risk areas. Most new virus  
33 species since 2010 in each region (6/6 in the United States, 19/19 in China, 12/19 in Africa)  
34 were discovered in high risk areas as predicted by our model.

35 **Conclusions** The drivers of spatiotemporal variation in virus discovery rates vary in different  
36 regions of the world. Within regions virus discovery is driven mainly by land-use and socio-  
37 economic variables; climate and biodiversity variables are consistently less important  
38 predictors than at a global scale. Potential new discovery hotspots in 2010–2019 are  
39 identified. Results from the study could guide active surveillance for new human-infective  
40 viruses in local high risk areas.

41 **Funding** Darwin Trust of Edinburgh; European Union.

42

## 43 **Introduction**

44 RNA viruses are the primary cause for emerging infectious diseases with epidemic potential,  
45 given that they have high rate of evolution and high capacity to adapt to new hosts  
46 (Woolhouse et al., 2016). In recent decades, infectious diseases caused by severe acute  
47 respiratory syndrome coronavirus (SARS-CoV), Middle East respiratory syndrome  
48 coronavirus (MERS-CoV), Bundibugyo Ebola virus and SARS-CoV-2 present major threats  
49 to the health and welfare of humans (Albarino et al., 2013; Ksiazek et al., 2003; Mackay et al.,  
50 2015; World Health Organisation, 2020). Detection of formerly unknown human-infective  
51 RNA viruses in the earliest stage after the emergence are essential for controlling the  
52 infections they cause. Measures to implement early detection include not only advanced  
53 diagnostic techniques (Lipkin et al., 2013), but more importantly the idea where to look for  
54 them (so-called hotspots) (Morse et al., 2012).

55 Socio-economic, environmental, and ecological factors related to both virus natural history  
56 and research effort have been found to affect the discovery of emerging RNA viruses (Jones  
57 et al., 2008; Morse et al., 2012; Rosenberg, 2015; Zhang et al., 2020). However, these factors  
58 are highly spatially heterogeneous, making the generality of any associations with discovery  
59 debatable. For example, the United States, China, and Africa have experienced different rates  
60 of socio-economic, environmental, and ecological changes in the last one hundred years. The  
61 United States has always had better resources to discover new viruses. For example, the  
62 Rockefeller Foundation—a U.S. foundation—supported the discovery of 23 arboviruses in  
63 Latin America, Africa, and India in 1951–1969 (Rosenberg, 2015). China has seen urban land  
64 coverage more than double and GDP per capita increase by seven times since the 1980s  
65 (Ritchie, 2018; Roser, 2013). Nine out of 223 human-infective RNA viruses have been  
66 originally discovered in China, and all were discovered after 1982 (Zhang et al., 2020). In

67 contrast, effective surveillance is challenging in less developed regions such as large parts of  
68 Africa given resource constraints (Petti et al., 2006).

69 There have been no previous comparisons of the specific predictors for RNA virus discovery  
70 in different regions. In this study, we applied a similar methodology from our previous study  
71 of global patterns of discovery of human-infective RNA viruses (Zhang et al., 2020) to  
72 investigate whether predictors of discovery rates within three regions—the United States,  
73 China and Africa—differ from one another and from those at the global level, using three  
74 new virus discovery data sets. We also mapped discovery probability in three regions in  
75 2010–2019 using the fitted models and historical predictors. According to findings from our  
76 previous study (Zhang et al., 2020), the main predictors for virus discovery at the global scale  
77 were GDP-related. This suggests that the patterns of virus discovery we have identified may  
78 have been largely driven by research effort rather than the underlying biology. In this study,  
79 by focusing on more restricted and homogenous regions where the research effort is less  
80 variable, we expected to identify predictors more associated with virus biology.

## 81 **Materials and Methods**

### 82 *Data sets of human-infective RNA viruses in three regions*

83 We performed an ecological study, and the subject of interest is each human-infective RNA  
84 virus species. With reference to a full list of human-infective RNA virus species (Zhang et al.,  
85 2020), we geocoded the first report of each in humans in the United States, China, and Africa  
86 separately. The latest version as of 31 December 2019 included 223 species (**Table 1S**), with  
87 *Human torovirus* abolished and a new species—*Heartland banyangvirus*—added by ICTV in  
88 2018 (International Committee on Taxonomy of Viruses, 2018). We defined discovery  
89 location as where the initial human was exposed to/infected with the virus, as suggested in  
90 the first report of human infections from peer-reviewed literature.

91 We followed the same search terms, databases searched, and inclusion or exclusion criteria as  
92 our global data set for data collection (Woolhouse et al., 2018). Reference databases included  
93 PubMed, Web of Science, Google Scholar, and Scopus. Two Chinese database [i.e. China  
94 National Knowledge Infrastructure (CNKI) and Wanfang Data] were also searched when  
95 collecting data for China. Reference lists of relevant studies and reviews were also checked  
96 manually to find potential earlier discovery papers. The following key words were used for  
97 the retrieval: virus full name or abbreviations or virus synonyms; and human\* or person\* or  
98 case\* or patient\* or worker\* or infection\* or disease\* or outbreak\* or epidemic\*; and region  
99 name (Chin\* or Taiwan or Hong Kong or Macau; United States or US or USA or America\*;  
100 Africa\* or all African country names). Virus synonyms and abbreviations include early  
101 names used in the discovery paper and all subtypes provided by the ICTV 10th report (*Full*  
102 *ICTV Online (10th) Report: [https://talk.ictvonline.org/ictv-reports/ictv\\_online\\_report/](https://talk.ictvonline.org/ictv-reports/ictv_online_report/)*).  
103 Evidence which met the following criteria from peer-reviewed literatures were included: (a)  
104 Diagnostic methods for RNA virus infection in humans were clearly described, through either  
105 viral isolation or serological methods; (b) Specific virus species name or subtypes falling  
106 under that species were clearly provided; (c) Both natural infection and iatrogenic or  
107 occupational infections were accepted. Evidence which met the following criteria were  
108 excluded: (a) Uncertain species due to cross-reactivity with related viruses; (b) Diagnostic  
109 methods for virus infection were not specified; (c) Description of clinical symptoms or  
110 pathogenicity were not considered as human infection of one certain virus species; (d) Report  
111 of '[virus name]-like' or 'potential [virus name] infections'; (d) Intentional infections  
112 including experimental inoculation or vitro infections; (e) Non-peer-reviewed literature,  
113 including media reports, thesis, or unpublished data. Literature selection was performed by  
114 two individuals independently and discrepancies were resolved by discussion with a third  
115 individual.

116 All locations were geolocated as precisely as possible using methods from our previous paper  
117 (Zhang et al., 2020). For each region, a polygon was created for those locations at  
118 administrative level 3 (county for the United States; city for China; for Africa, it varies  
119 between different countries) and above. Details of data types for virus discovery database in  
120 three regions was summarised in **Table 2S**. The majority of discovery locations in the United  
121 States and Africa involved point data, while in China the majority involved polygon data at  
122 province level. A bootstrap resampling procedure was developed for polygon data covering  
123 more than one grid cell (details below). Discovery date of human infection was defined as the  
124 publication year in the scientific literature.

### 125 *Spatial covariates*

126 As for our global analysis (Zhang et al., 2020), a suite of global gridded climatic, socio-  
127 economic, land use, and biodiversity variables (n=33) postulated to affect the spatial  
128 distribution of RNA virus discovery were compiled, each at a resolution of 0.5°/30" (except  
129 university count having a resolution at country level for Africa and state/province for the  
130 United States and China). Data for the United States, China and Africa were extracted by  
131 restricting the coordinates within each region. The definition, original resolution, and source  
132 of each variable were the same as our previous paper (Zhang et al., 2020). All predictors were  
133 aggregated from their original spatial resolution to 1°×1° resolution; data for climatic  
134 variables, population, GDP, and land use data without full temporal coverage were  
135 extrapolated back to 1901; both following methods from our previous paper (Zhang et al.,  
136 2020).

### 137 *Boosted regression trees modelling*

138 We used Poisson boosted regression trees (BRT) model to examine the relationship between  
139 discovery of RNA virus and 33 predictors for each 1° resolution of grid cell across each

140 region separately, following codes from our previous study (Zhang et al., 2020) and one  
141 previous paper (Allen et al., 2017). As a tree-based learning method, BRT model can  
142 automatically capture complex relationships and interactions between variables, and also can  
143 well account for spatial autocorrelation within the data (Crane et al., 2012). We compared  
144 Moran's I values of the raw virus data and the model residuals to estimate the ability of the  
145 BRT model to account for spatial autocorrelation (Cliff et al., 1981). In order to minimise the  
146 effect of spatial uncertainty of virus discovery data, we performed 1000 times bootstrap  
147 resampling for those discovery locations reported as polygons. We assumed each grid cell in  
148 the polygon has the equal chance to be selected, and for each virus record we selected one  
149 grid cell randomly from the polygon for each subsample. A ratio of 1:2 for presence to  
150 absence constituted each subsample, i.e., for each grid cell with virus discovery, two grid  
151 cells with no discovery were randomly selected from 'virus discovery free' areas at all time  
152 points within the region. Take the United States as an example, each subsample included 95  
153 grid cells with virus discovery and 190 with no virus discovery. We then matched the virus  
154 data with all predictors (using the nearest decade for time-varying predictors). We assumed  
155 that the virus count in any given grid cell in each decade followed a Poisson distribution, and  
156 we calculated the virus discovery count in each grid cell by decade as the response variable.

157 All BRT models were fitted in R v. 3.6.3, using packages `dismo` and `gbm`. BRT models  
158 require the user to balance three parameters including tree complexity, learning rate, and bag  
159 fraction. Tree complexity reflects the order of interaction in a tree; learning rate shrinks the  
160 contribution of each tree to the growing model; bag fraction specifies the proportion of data  
161 drawn from the full training data at each step. We set these parameters as recommended from  
162 Elith et al (Elith et al., 2008), and make sure each resampling model contained at least 1000  
163 trees. BRT models identified the final optimal number of trees in each model using a 10-fold  
164 cross validation stagewise function (Elith et al., 2008). The three parameter values of the



165 optimal model as well as the mean optimal number of trees across 1000 replicate models for  
166 all three regions were summarised in **Table 3S**.

167 By fitting 1000 replicate BRT models, the relative contribution plots and partial dependence  
168 plots with 95% quantiles were plotted. We defined variables with a relative contribution  
169 greater than the mean (3.03%) as influential predictors in all three regions (Shearer et al.,  
170 2018). The partial dependence plots depict the influence of each variable on the response  
171 while controlling for the average effects of all the other variables in the model. The map of  
172 virus discovery probability across each region in 2010–2019 was derived from the means of  
173 the predictions of 1000 replicate models, using values of the 33 predictors in 2015. In order to  
174 show discovery hotspots, we converted the prediction map of virus count to a map of  
175 probability.

176 Two statistics were calculated to evaluate the model's predictive performance: a) the  
177 deviance of the bootstrap model (Elith et al., 2008), b) intraclass correlation coefficient (ICC)  
178 calculated from 50 rounds of ten-fold cross-validation, by following methods from our  
179 previous paper (Zhang et al., 2020). For the ten-fold cross-validation, we selected 50 data sets  
180 randomly from the 1000 bootstrapped subsamples. We took the first data set and divided into  
181 ten subsets. For each round of ten-fold cross-validation, the unique combinations of 9 subsets  
182 constituted the training sets and were used to fit models, and the remaining one was used as a  
183 test set to evaluate the predictive performance of the model. We repeat the same process as  
184 above for the remaining 49 data sets. One intraclass correlation coefficient (ICC) was  
185 calculated from each round of validation and the median with 95% quantiles across all 50  
186 rounds was calculated. The ICC varies between 0 and 1, with an ICC of less than 0.40  
187 representing a poor model, 0.40–0.59 representing a fair model, 0.60–0.74 representing a  
188 good model, and 0.75–1 representing an excellent model (Cicchetti, 1994).

189 Exploratory subgroup analyses (distinguishing viruses firstly discovered in regions and those  
190 that had been discovered elsewhere in the world) were performed. We used the same BRT  
191 modelling approach as we described above, and relative contribution of each predictor was  
192 calculated for each subgroup. We were unable to perform subgroup analysis for China  
193 because only 9 human-infective RNA viruses have been firstly discovered in it, and BRT  
194 model cannot be fitted to a sample as small as 9.

195 The R software, version 3.6.3 (R Foundation for Statistical Computing, Vienna, Austria) was  
196 used for all statistical analyses. All maps were visualised by using ArcGIS Desktop 10.5.1  
197 (Environmental Systems Research Institute).

## 198 **Results**

199 The numbers of human-infective virus species discovered in the United States, China and  
200 Africa up to October 2019 were 95, 80 and 107 respectively (**Table 1S**). Most first  
201 discoveries have been in eastern United States (especially in areas around Maryland,  
202 Washington, D.C., and New York), eastern China (developed cities including Beijing, Hong  
203 Kong, Shanghai, and Guangzhou), and southern and central Africa (Pretoria and  
204 Johannesburg, South Africa; Borno State and Ibadan, Nigeria) (**Figure 1**). A total of 60 virus  
205 species were previously reported in all three regions, and 27, 12, 37 species were only found  
206 in the United States, China, and Africa respectively (**Figure 2**). In all three regions, smaller  
207 proportions of viruses were vector-borne [United States: 23.2% (22/95); China: 21.3%  
208 (17/80); Africa: 27.1% (29/107)] and strictly zoonotic [United States: 30.5% (29/95); China:  
209 16.3% (13/80); Africa: 33.6% (36/107)], compared to large proportions for both virus types at  
210 the global scale [vector-borne: 41.7% (93/223) and strictly zoonotic: 58.7% (131/223)]  
211 (**Figure 2**). The 60 shared species were also disproportionally vector-borne [11.7% (7/60)]  
212 and strictly zoonotic [7% (4/60), **Figure 2**].

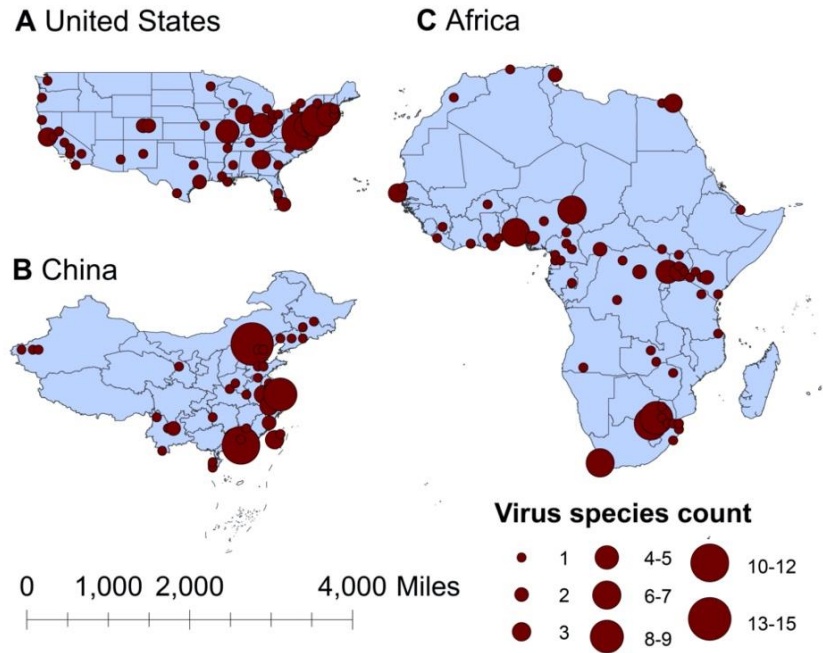

213

214 **Figure 1 Spatial distribution of human-infective RNA virus discovery in three regions, 1901–2019. A,**

215 United States. B, China. C, Africa. Red dots represent discovery points or centroids of polygons, with the size

216 representing the cumulative virus species count.

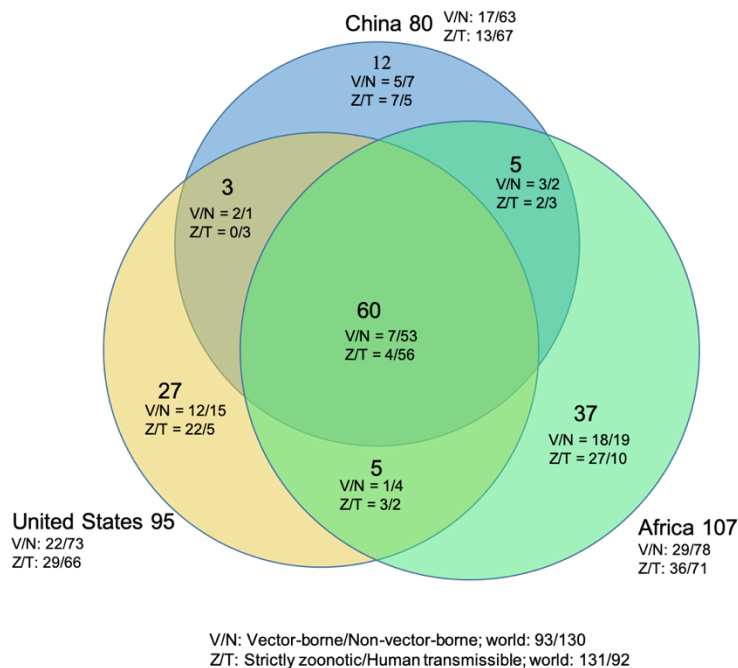

217

218 **Figure 2 Shared human-infective RNA virus species count in three regions. Under/By the species count the**

219 ratios of vector-borne (V) to non-vector-borne (N) viruses and strictly zoonotic (Z) to human transmissible (T)

220 viruses were shown.

221 The discovery curves for the United States and Africa have seen a broadly similar pattern,  
222 with China lagging behind these two regions (**Figure 3**). In comparison with the world, the  
223 median time lag of the virus discovery was 0 [interquartile range (IQR): 2.5], 12 (IQR: 29.5)  
224 and 2 (IQR: 10.5) years in the United States, China and Africa, respectively (**Figure 1S**). In  
225 China, the time lag was noticeably shorter for viruses discovered after 1975 [before 1975: a  
226 median lag of 30.5 (IQR: 30.5) years; after 1975: 2.5 (IQR: 7) years, p value of Wilcoxon  
227 rank sum test < 0.001].

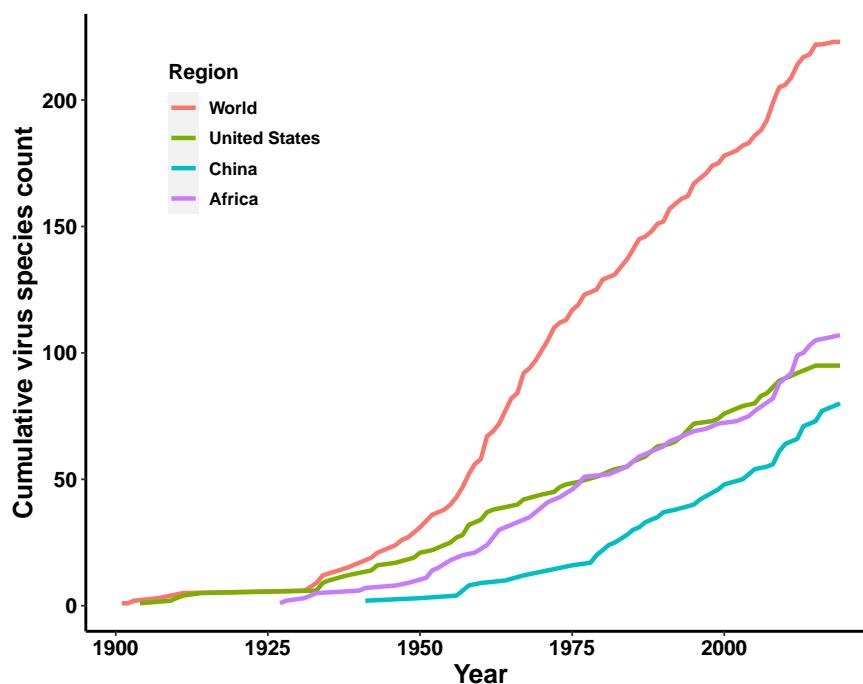

228

229 **Figure 3 Discovery curve of human-infective RNA virus species in three regions and the world**

230 In the United States, six variables including three predictors related to land use [urbanized  
231 land: relative contribution of 35.8%, urbanization of cropland (i.e. the percentage of land area  
232 change from cropland to urban land): 8.0%, growth of urbanized land: 4.1%], two socio-  
233 economic variables (GDP growth: 10.0%; GDP: 5.7%), and one climatic variable (diurnal  
234 temperature change: 4.9%) were identified as important predictors for discriminating between  
235 locations with and without virus discovery (**Figure 4A**). The partial dependence plots shown

236 in **Figure 2S** suggested non-linear relationships between the probability of virus discovery  
237 and most predictors. All important predictors presented a positive trend over narrow ranges at  
238 lower values.

239 In China, twelve variables including four socio-economic variables (GDP: 12.7%, university  
240 count: 7.5%, GDP growth: 4.6%, population growth: 4.4%), five predictors involving land  
241 use [pasture: 8.3%, urbanized land: 8.1%, vegetation: 5.8%, cropland: 5.3%, urbanization of  
242 secondary land (the percentage of land area change from secondary land to urban land;  
243 secondary land is natural vegetation that is recovering from previous human disturbance):  
244 3.3%], and three climatic variables (maximum precipitation: 4.5%, precipitation change:  
245 3.8%, diurnal temperature range: 3.3%) were identified as important predictors for  
246 discriminating between locations with and without virus discovery (**Figure 4B**). GDP,  
247 urbanized land, university count, vegetation, GDP growth, maximum precipitation,  
248 population growth, and urbanization of secondary land presented a positive trend over narrow  
249 ranges at lower levels; pasture, cropland, precipitation change, and diurnal temperature range  
250 had non-monotonic/ negative impacts, with highest risks at lower values (**Figure 3S**).

251 In Africa, ten variables including two socio-economic variables (GDP growth: 21.2%, GDP:  
252 13.0%), seven predictors related to land use (urbanized land: 9.4%, growth of cropland area:  
253 5.6%, urbanization of cropland: 5.5%, growth of urbanized land: 5.1%, urbanization of  
254 pasture: 3.8%, vegetation, 3.7%, cropland: 3.2%), and one biodiversity variable (mammal  
255 species richness: 3.1%) were identified as important predictors for discriminating between  
256 locations with and without virus discovery (**Figure 4C**). All important predictors presented a  
257 positive trend over narrow ranges at lower positive values, except mammal species over a  
258 large range (**Figure 4S**).

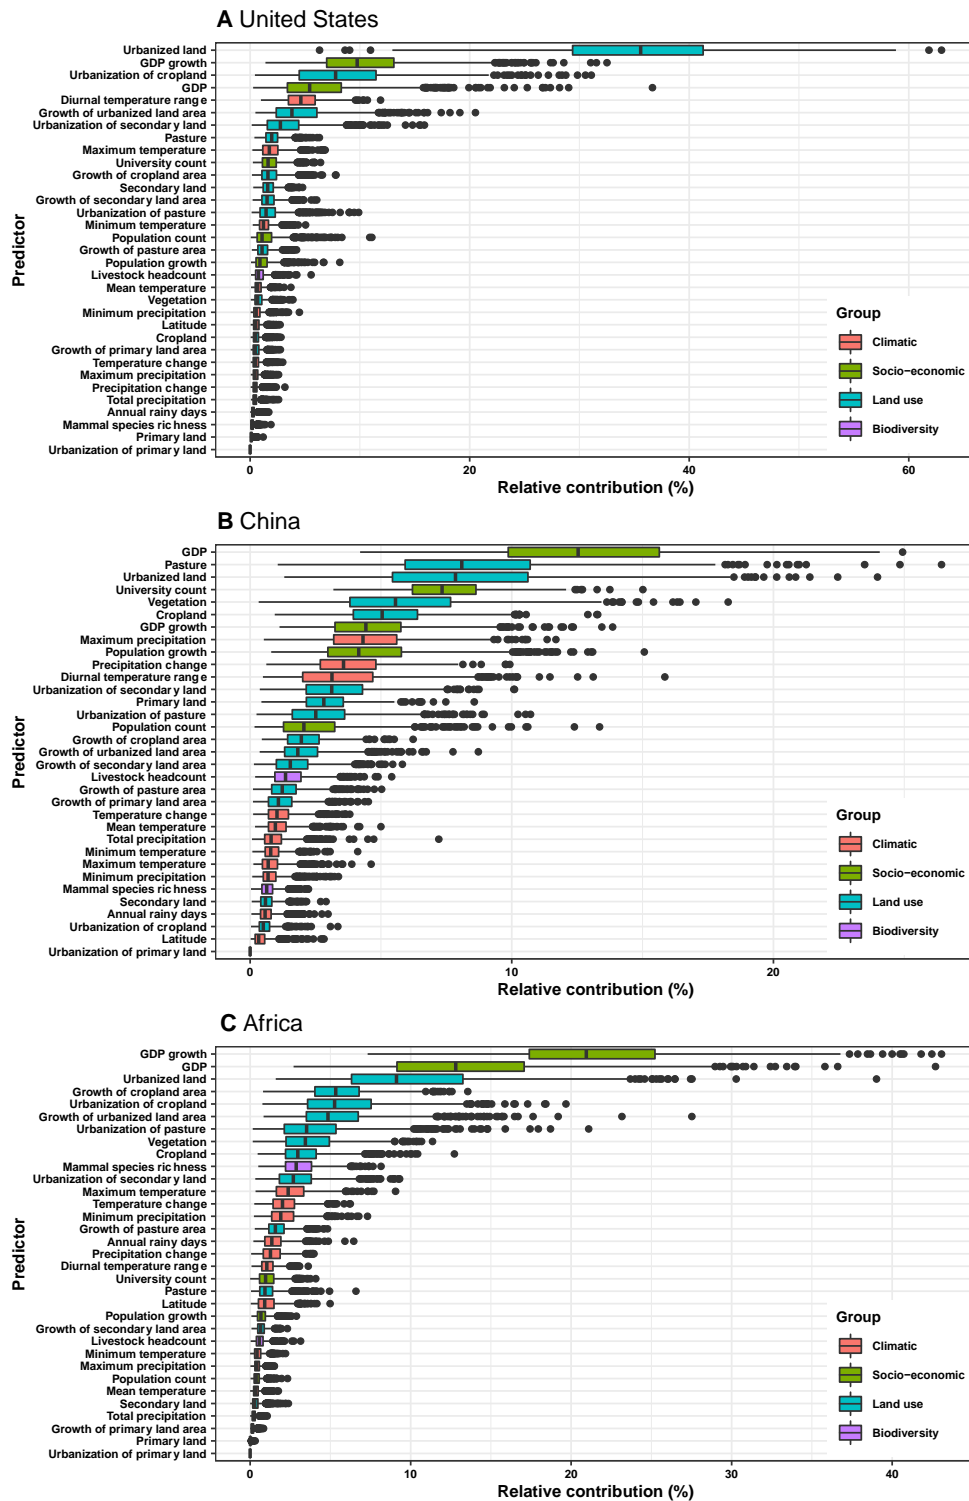

259

260 **Figure 4 Relative contribution of predictors to human-infective RNA virus discovery in three regions. A,**  
 261 **United States. B, China. C, Africa. The boxplots show the median (black bar) and interquartile range (box) of**  
 262 **the relative contribution across 1000 replicate models, with whiskers indicating minimum and maximum and**  
 263 **black dots indicating outliers.**

264 Our BRT models reduced Moran's I value below 0.15 in all three regions (**Figure 5S**),  
265 suggesting that BRT models with 33 predictors have adequately accounted for spatial  
266 autocorrelations in the raw virus data in all three regions. The model validation statistics for  
267 each region are shown in **Table 4S**. Combining these measures, our BRT model predictions  
268 range from fair to good (Cicchetti, 1994).

269 In all three regions, human-infective RNA virus discovery was best predicted by land use and  
270 socio-economic variables, followed by climatic variables and biodiversity (**Figure 5**),  
271 whereas virus discovery was more associated with climatic variables and biodiversity at the  
272 global level. The comparison between three regions showed that: climatic variables  
273 contributed most to the discovery of human-infective RNA viruses in China; land use  
274 contributed most to the discovery in the United States; socio-economic variables and  
275 biodiversity contributed most to the discovery in Africa and least to discovery in the United  
276 States.

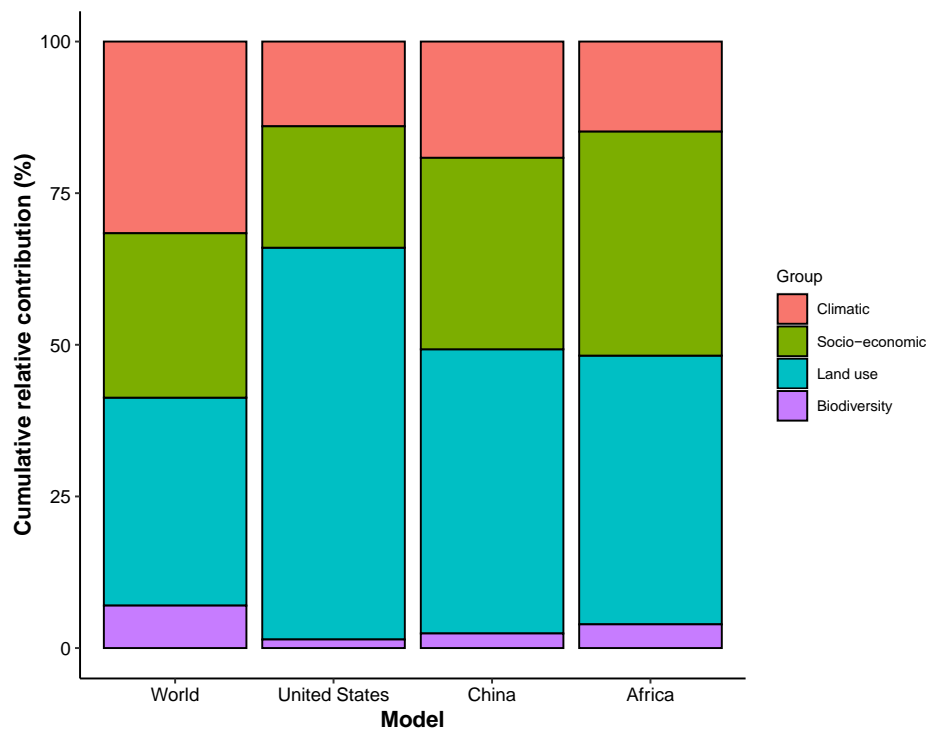

277

278 **Figure 5 Cumulative relative contribution of predictors to human-infective RNA virus discovery by**  
279 **group in each model of different regions.** The relative contributions of all explanatory factors sum to 100% in  
280 each model, and each colour represents the cumulative relative contribution of all explanatory factors within  
281 each group.

282 We mapped human-infective RNA virus discovery probability in 2010–2019 for the three  
283 regions, based on the fitted BRT models and values of all 33 predictors in 2015 (**Figure 6S–**  
284 **Figure 8S**). Outside contemporary risk areas where human-infective RNA viruses were  
285 previously discovered in the United States (**Figure 1A**), we predicted high probabilities of  
286 virus discovery across southern Michigan, central-Northern Carolina, central Oklahoma,  
287 southern Nevada, and north-eastern Utah (**Figure 6A**). Outside contemporary risk areas  
288 where human-infective RNA viruses were previously discovered in China (**Figure 1B**), we  
289 predicted high probabilities of virus discovery across other eastern China area as well as two  
290 western areas including south-central Shaanxi and north-eastern Sichuan (**Figure 6B**).  
291 Outside contemporary risk areas where human-infective RNA viruses were previously  
292 discovered in Africa (**Figure 1C**), we predicted high probabilities of virus discovery across  
293 northern Morocco, northern Algeria, northern Libya, south-eastern Sudan, central Ethiopia  
294 and western Democratic Republic of the Congo (**Figure 6C**). Most new virus species since  
295 2010 in each region (6/6 in the United States, 19/19 in China, 12/19 in Africa) were  
296 discovered in high-risk areas (85% percentiles of predicted probability across each region) as  
297 predicted by our model. Of all the 37 (United States: 6; China: 19; Africa: 12) viruses  
298 discovered in high-risk areas in 2010–2019, 13 (United States: 2; China: 7; Africa: 4) viruses  
299 were discovered at the potential new hotspots where there have not been any virus  
300 discoveries before 2010.



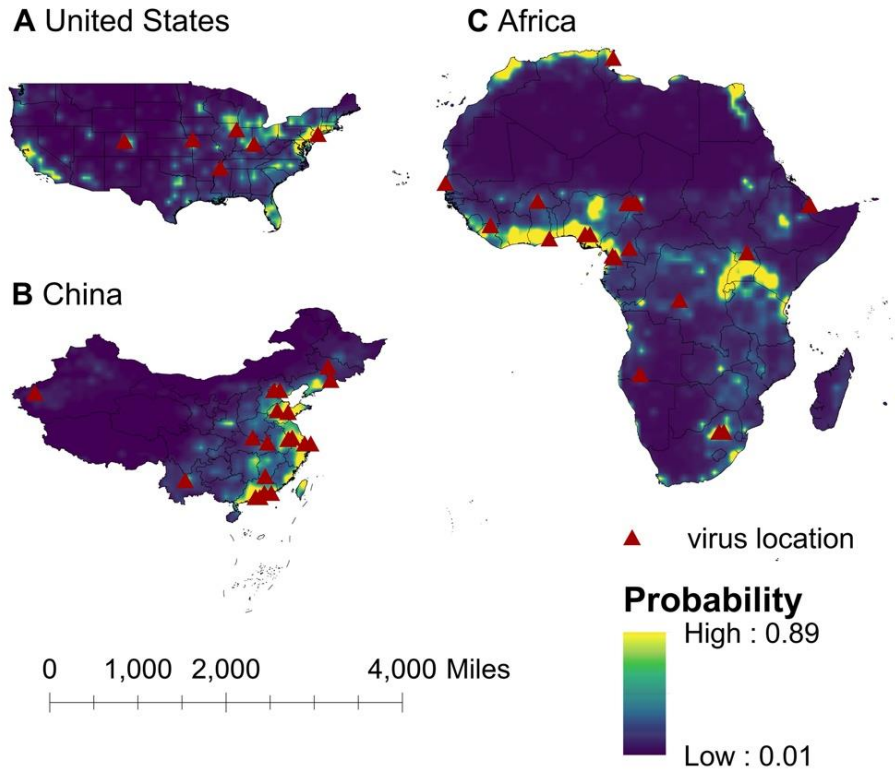

301

302 **Figure 6 Predicted probability of human-infective RNA virus discovery in three regions in 2010–2019. A,**  
303 **United States. B, China. C, Africa. The triangles represented the actual discovery sites from 2010 to 2019, and**  
304 **the background colour represented the predicted discovery probability.**

305 Based on our subgroup analysis (distinguishing viruses firstly discovered in regions and those  
306 that had been discovered elsewhere in the world), discoveries of human-infective RNA  
307 viruses firstly discovered from either United States or Africa were better predicted by  
308 climatic and biodiversity variables, while discoveries of viruses that had been discovered  
309 from elsewhere in the world were better predicted by socio-economic variables (**Figure 9S**).

## 310 **Discussion**

311 To our knowledge, this analysis represents the first investigation of human-infective RNA  
312 virus discovery in three large regions of the world which have experienced distinct socio-  
313 economic, ecological and environmental changes over the last 100 years. In total, 95 human-  
314 infective RNA virus species had been found in the United States; 80 in China; 107 in Africa.

315 The discovery maps of human-infective RNA virus in the three regions indicated areas with  
316 historically high discovery counts: eastern and western United States, eastern China, and  
317 central and southern Africa. BRT modelling suggested that the relative contribution of 33  
318 predictors to human-infective RNA virus discovery varied across three regions, though  
319 climatic and biodiversity variables were consistently less important in all three regions than at  
320 a global scale. We mapped the probability of human-infective RNA virus discovery in 2010–  
321 2019 which would continue to be high in historical hotspots but, in addition, we identified  
322 several new hotspots in central-eastern and southwestern United States, eastern and western  
323 China, and northern Africa. These results offer a tool for public health practitioners and  
324 policy-makers to better understand local patterns of virus discovery and to invest efficiently  
325 in surveillance systems at the local level.

326 In all three regions, GDP and/or GDP growth were identified as important predictors for virus  
327 discovery, especially in Africa where GDP and GDP growth were identified as the leading  
328 predictors. This is consistent with our previous analysis that GDP and GDP growth play a  
329 major role in discovering viruses (Zhang et al., 2020). In general, sufficient economic, human  
330 and material resources, the availability of advanced infrastructure and technology, and greater  
331 research capabilities in the relative higher-income areas enable the virus discovery  
332 (Rosenberg et al., 2013). That this effect applied both within one continent and within single  
333 countries such as the United States and China suggested that most virus discoveries were  
334 likely passive, i.e. the viruses were detected when they arrived in a location with the  
335 resources to detect them. This is plausible because in all regions in our study, human-  
336 transmissible viruses accounted for the larger proportion, and our previous analysis suggested  
337 richer areas were more likely to first capture transmissible viruses (e.g. Influenza virus,  
338 Rhinovirus, Rabies lyssavirus, Measles morbillivirus, Mumps orthorubulavirus, Rubella virus,  
339 and Norwalk virus) capable of spreading to multiple areas (Zhang et al., 2020). Temporally,

340 in China the rate of discovery increased after economic growth accelerated in the 1980s  
341 (**Figure 3**). We note in publications describing first virus discoveries that most historical  
342 virus discoveries in Africa received support from the United States and Europe, and this may  
343 explain why Africa saw an increased number of virus discoveries after 1950—30 years  
344 earlier than China (**Figure 3**). Notably, in China the relative contribution of GDP growth to  
345 virus discovery was not as substantial as that in Africa. In contrast, university count was  
346 found to be associated with virus discovery, suggesting virus discovery likely being a  
347 significant area of research in Chinese universities. Our model also suggested the overall  
348 socio-economic factors contributed less in the United States than other two regions. The  
349 possible explanation is that the socio-economic level across the whole United States is  
350 relatively high and homogenous.

351 Predictors other than GDP and university count are likely to be linked to virus natural history.  
352 In all three regions, the area of urban land and further urbanization made great contribution to  
353 virus discovery. This reinforced previous studies that urbanization was linked to the detection  
354 of new human pathogens through the denser urban population, increased human-wildlife  
355 contact rate, spill-over of human infection from enzootic cycle, and the contamination of the  
356 urban environment with microbial agents (Hassell et al., 2017; Olival et al., 2017; Weaver,  
357 2013). In the United States, land use contributed most to virus discovery in comparison to  
358 other regions—urbanized land, urbanization of cropland, and growth of urbanized land alone  
359 had a relative contribution of 47.9%. However, the leading role of urbanization to virus  
360 discovery in the United States remains unclear. There might be many factors contributing to  
361 this, e.g. the underlying relationships between urbanization and economic growth as well as  
362 population growth, but we can't untangle these from this study.

363 Consistent with our previous work, population growth was identified as a less prominent  
364 predictors (Zhang et al., 2020). In China, population growth—though with greater influence  
365 than other regions—contributed less than urbanized land and three other land types on virus  
366 discoveries. This reinforces our previous interpretation that urbanization brings larger  
367 changes on human living environment than human population size/growth, and therefore may  
368 have influenced virus discovery more greatly.

369 Climate had less influence on human-infective RNA virus discovery in all three regions in  
370 comparison to other predictors, in contrast to virus discovery at a global scale (Zhang et al.,  
371 2020). The underlying reason may be that the proportion of vector-borne viruses—whose  
372 distribution and abundance is strongly associated with the impact of climate on vector  
373 populations (Li et al., 2014)—in all three regions (United States: 23.2%; China: 21.3%;  
374 Africa: 27.1%) were less than that in the world (41.7%) (**Figure 3**). Vector-borne viruses  
375 tend to have more restricted global ranges, so are less likely to appear in a study of any one  
376 region (Zhang et al., 2020).

377 In addition, a relative smaller proportion of strictly zoonotic viruses in three regions (United  
378 States: 30.5%; China: 16.3%; Africa: 33.6%) than that in the world (58.7%) (**Figure 2**) made  
379 biodiversity contribute less to virus discovery in the three regions than in the world (Zhang et  
380 al., 2020). With exposure to denser mammals played a slightly larger role in virus discovery  
381 in Africa than in China and the United States (**Figure 6S–Figure 8S**).

382 Our discovery probability maps for 2010–2019 in three regions captured most historical  
383 hotspots, though several small new areas in central-eastern and southwestern United States,  
384 eastern and western China, as well as northern Africa would also make greater contribution to  
385 virus discovery (**Figure 6**). Our model has a good predictive ability, given 84% (37/44) new  
386 virus species in 2010–2019 were discovered in high-risk areas we have defined—85%

387 percentiles of discovery probability within each region. Further, 35% (13/37) of those viruses  
388 discovered in high-risk areas since 2010 were discovered at the potential new hotspots where  
389 there had not been any virus discoveries in the past.

390 Our subgroup analyses suggested in both the United States and Africa, discoveries of viruses  
391 firstly discovered in regions were more likely to be associated with climatic and biodiversity  
392 variables while discoveries of viruses had been discovered elsewhere in the world were more  
393 likely to be associated with socio-economic variables. This is plausible, again because after a  
394 novel virus was discovered elsewhere in the world, it is usually areas with a higher socio-  
395 economic level firstly capture the virus in the local region.

396 This study had limitations. First, one common problem for data collected from literature  
397 review is the time lag between virus discovery and publication, in which case the virus data  
398 are likely to be matched to covariates in later decades. Second, we acknowledge that it is  
399 possible we have not identified the earliest report for some well-known viruses such as  
400 yellow fever virus, measles virus, especially in the post-vaccination era. Third, we were  
401 unable to identify robust and comprehensive data for all three regions on virus discovery  
402 effort, although we interpret GDP and university count as being an indirect measure of  
403 resources available for this activity.

404 The study adds to our previous study (Zhang et al., 2020) in several ways. First, we firstly  
405 construct data sets of human-infective RNA virus discovery reflecting the viral richness in  
406 three broad regions of the world. Second, we reduced the heterogeneity of the predictors by  
407 focusing on regions, including those predictors reflecting the research effort. Research effort  
408 is less variable within restricted regions and therefore has less effect on virus detection. This  
409 implies our predicted hotspots stand closer to the virus geographic distribution in nature.  
410 Third, the predicted hotspots derived from regional analysis have a higher precision than at a

411 global scale, e.g. specific areas in the United States and China were identified as hotspots  
412 from regional analysis, rather than the whole eastern area from the global analysis. This helps  
413 target areas for future surveillance.

414 In conclusion, a heterogeneous pattern of virus discovery-driver relationships was identified  
415 across three regions and the globe. Within regions virus discovery is driven more by land-use  
416 and socio-economic variables; climate and biodiversity variables are consistently less  
417 important predictors than at a global scale. We mapped with good accuracy that in 2010–  
418 2019 three regions where human-infective RNA viruses had previously been discovered  
419 would continue to be the discovery hotspots, but in addition, several new areas in each region  
420 would make great contribution to virus discovery. Results from the study could guide active  
421 surveillance for new human-infective viruses in high risk areas.

#### 422 **Author contributions**

423 Feifei Zhang, Conceptualization, Data preparation, Formal analysis, Methodology, Validation,  
424 Visualization, Interpretation, Writing - original draft, Writing - review and editing; Margo  
425 Chase-Topping, Methodology, Interpretation, Writing - review and editing; Chuan-Guo Guo,  
426 Data preparation, Methodology, Validation, Interpretation, Writing - review and editing;  
427 Mark E.J. Woolhouse, Conceptualization, Methodology, Interpretation, Writing - original  
428 draft, Writing - review and editing, Funding Acquisition.

#### 429 **Competing interests**

430 The authors disclose no conflicts of interest.

## 431 **Funding**

432 FFZ is funded by the Darwin Trust of Edinburgh  
433 (<https://darwintrust.bio.ed.ac.uk/%20edinburgh>). MEJW has received funding from the  
434 European Union's Horizon 2020 research and innovation programme under grant agreement  
435 No. 874735 (VEO) (<https://www.veo-europe.eu/>). The funders had no role in study design,  
436 data collection and interpretation, or the decision to submit the work for publication.

## 437 **Data availability**

438 The authors confirm that all data or the data sources are provided in the paper and its  
439 Supplementary Materials. The final datasets and codes used for the analyses are available via  
440 figshare at <https://doi.org/10.6084/m9.figshare.15101979>.

## 441 **References**

- 442 Albarino, C. G., Shoemaker, T., Khristova, M. L., Wamala, J. F., Muyembe, J. J., Balinandi, S., . . .  
443 Stroher, U. (2013). Genomic analysis of filoviruses associated with four viral hemorrhagic  
444 fever outbreaks in Uganda and the Democratic Republic of the Congo in 2012. *Virology*,  
445 *442*(2), 97-100.
- 446 Allen, T., Murray, K. A., Zambrana-Torrel, C., Morse, S. S., Rondinini, C., Di Marco, M., . . .  
447 Daszak, P. (2017). Global hotspots and correlates of emerging zoonotic diseases. *Nat*  
448 *Commun*, *8*(1), 1124.
- 449 Cicchetti, D. V. (1994). Guidelines, criteria, and rules of thumb for evaluating normed and  
450 standardized assessment instruments in psychology. *Psychological Assessment*, *6*(4), 284-290.
- 451 Cliff, A. D., & Ord, J. K. (1981). *Spatial processes: Models and applications*. London: Pion Limited.
- 452 Crase, B., Liedloff, A. C., & Wintle, B. A. (2012). A new method for dealing with residual spatial  
453 autocorrelation in species distribution models. *Ecography*, *35*(10), 879-888.

- 454 Elith, J., Leathwick, J. R., & Hastie, T. (2008). A working guide to boosted regression trees. *J Anim*  
455 *Ecol*, 77(4), 802-813.
- 456 *Full ICTV Online (10th) Report*: [https://talk.ictvonline.org/ictv-reports/ictv\\_online\\_report/](https://talk.ictvonline.org/ictv-reports/ictv_online_report/). Retrieved  
457 from
- 458 Hassell, J. M., Begon, M., Ward, M. J., & Fevre, E. M. (2017). Urbanization and Disease Emergence:  
459 Dynamics at the Wildlife-Livestock-Human Interface. *Trends Ecol Evol*, 32(1), 55-67.
- 460 International Committee on Taxonomy of Viruses. (2018). Virus Taxonomy: The ICTV Report on  
461 Virus Classification and Taxon Nomenclature. Retrieved from [https://talk.ictvonline.org/ictv-](https://talk.ictvonline.org/ictv-reports/ictv_online_report/)  
462 [reports/ictv\\_online\\_report/](https://talk.ictvonline.org/ictv-reports/ictv_online_report/)
- 463 Jones, K. E., Patel, N. G., Levy, M. A., Storeygard, A., Balk, D., Gittleman, J. L., & Daszak, P.  
464 (2008). Global trends in emerging infectious diseases. *Nature*, 451(7181), 990-993.
- 465 Ksiazek, T. G., Erdman, D., Goldsmith, C. S., Zaki, S. R., Peret, T., Emery, S., . . . Anderson, L. J.  
466 (2003). A novel coronavirus associated with severe acute respiratory syndrome. *N Engl J Med*,  
467 348(20), 1953-1966.
- 468 Li, L. M., Grassly, N. C., & Fraser, C. (2014). Genomic analysis of emerging pathogens: methods,  
469 application and future trends. *Genome Biol*, 15(11), 541.
- 470 Lipkin, W. I., & Firth, C. (2013). Viral surveillance and discovery. *Curr Opin Virol*, 3(2), 199-204.
- 471 Mackay, I. M., & Arden, K. E. (2015). MERS coronavirus: diagnostics, epidemiology and  
472 transmission. *Virol J*, 12, 222.
- 473 Morse, S. S., Mazet, J. A., Woolhouse, M., Parrish, C. R., Carroll, D., Karesh, W. B., . . . Daszak, P.  
474 (2012). Prediction and prevention of the next pandemic zoonosis. *Lancet*, 380(9857), 1956-  
475 1965.
- 476 Olival, K. J., Hosseini, P. R., Zambrana-Torrel, C., Ross, N., Bogich, T. L., & Daszak, P. (2017).  
477 Host and viral traits predict zoonotic spillover from mammals. *Nature*, 546(7660), 646-650.
- 478 Petti, C. A., Polage, C. R., Quinn, T. C., Ronald, A. R., & Sande, M. A. (2006). Laboratory Medicine  
479 in Africa: A Barrier to Effective Health Care. *Clinical Infectious Diseases*, 42(3), 377-382.
- 480 Ritchie, H. (2018). "Urbanization". Published online at OurWorldInData.org. Retrieved from:  
481 <https://ourworldindata.org/urbanization>'.



- 482 Rosenberg, R. (2015). Detecting the emergence of novel, zoonotic viruses pathogenic to humans. *Cell*  
483 *Mol Life Sci*, 72(6), 1115-1125.
- 484 Rosenberg, R., Johansson, M. A., Powers, A. M., & Miller, B. R. (2013). Search strategy has  
485 influenced the discovery rate of human viruses. *Proceedings of the National Academy of*  
486 *Sciences*, 201307243.
- 487 Roser, M. (2013). "Economic Growth". Published online at OurWorldInData.org. Retrieved from:  
488 ['https://ourworldindata.org/economic-growth'](https://ourworldindata.org/economic-growth)
- 489 Shearer, F. M., Longbottom, J., Browne, A. J., Pigott, D. M., Brady, O. J., Kraemer, M. U. G., . . .  
490 Golding, N. (2018). Existing and potential infection risk zones of yellow fever worldwide: a  
491 modelling analysis. *Lancet Global Health*, 6(3), E270-E278.
- 492 Weaver, S. C. (2013). Urbanization and geographic expansion of zoonotic arboviral diseases:  
493 mechanisms and potential strategies for prevention. *Trends Microbiol*, 21(8), 360-363.
- 494 Woolhouse, M., & Brierley, L. (2018). Epidemiological characteristics of human-infective RNA  
495 viruses. *Sci Data*, 5, 180017.
- 496 Woolhouse, M., Brierley, L., McCaffery, C., & Lycett, S. (2016). Assessing the Epidemic Potential of  
497 RNA and DNA Viruses. *Emerg Infect Dis*, 22(12), 2037-2044.
- 498 World Health Organisation. (2020). Coronavirus disease (COVID-2019) situation reports. Retrieved  
499 from <https://www.who.int/emergencies/diseases/novel-coronavirus-2019/situation430>
- 500 Zhang, F., Chase-Topping, M., Guo, C. G., van Bunnik, B. A. D., Brierley, L., & Woolhouse, M. E. J.  
501 (2020). Global discovery of human-infective RNA viruses: A modelling analysis. *PLoS*  
502 *Pathog*, 16(11), e1009079.

503

# 1 Supplementary materials

## 2 *Supplementary tables*

### 3 Table 1S Summary of the human-infective RNA virus data sets in the United States, Africa and China

| Species                                     | Original discovery year | United States     |                |                                             |       |         | China             |                |                                     |       |        | Africa            |                |                                                                  |        |       |
|---------------------------------------------|-------------------------|-------------------|----------------|---------------------------------------------|-------|---------|-------------------|----------------|-------------------------------------|-------|--------|-------------------|----------------|------------------------------------------------------------------|--------|-------|
|                                             |                         | Reported?         | Discovery year | location                                    | Lat   | Lon     | Reported?         | Discovery year | location                            | Lat   | Lon    | Reported?         | Discovery year | location                                                         | Lat    | Lon   |
| Argentinian mammarenavirus                  | 1958                    | No                |                |                                             |       |         | No                |                |                                     |       |        | No                |                |                                                                  |        |       |
| Brazilian mammarenavirus                    | 1994                    | Yes <sup>1</sup>  | 1995           | New Haven, Connecticut                      | 41.31 | -72.93  | No                |                |                                     |       |        | No                |                |                                                                  |        |       |
| Cali mammarenavirus                         | 1971                    | Yes <sup>2</sup>  | 1974           | Houston, Texas                              | 29.76 | -95.37  | No                |                |                                     |       |        | No                |                |                                                                  |        |       |
| Chapare mammarenavirus                      | 2008                    | No                |                |                                             |       |         | No                |                |                                     |       |        | No                |                |                                                                  |        |       |
| Guanarito mammarenavirus                    | 1991                    | No                |                |                                             |       |         | No                |                |                                     |       |        | No                |                |                                                                  |        |       |
| Lassa mammarenavirus                        | 1970                    | Yes <sup>3</sup>  | 1970           | New Haven, Connecticut                      | 41.31 | -72.93  | No                |                |                                     |       |        | Yes <sup>3</sup>  | 1970           | Lassa, Borno State, Nigeria                                      | 10.69  | 13.27 |
| Lujo mammarenavirus                         | 2009                    | No                |                |                                             |       |         | No                |                |                                     |       |        | Yes <sup>4</sup>  | 2009           | Lusaka, Zambia                                                   | -15.39 | 28.32 |
| Lymphocytic choriomeningitis mammarenavirus | 1934                    | Yes <sup>5</sup>  | 1934           | St. Louis county, Missouri                  | 38.61 | -90.41  | No                |                |                                     |       |        | No                |                |                                                                  |        |       |
| Machupo mammarenavirus                      | 1964                    | No                |                |                                             |       |         | No                |                |                                     |       |        | No                |                |                                                                  |        |       |
| Mobala mammarenavirus                       | 1985                    | No                |                |                                             |       |         | No                |                |                                     |       |        | Yes <sup>6</sup>  | 1985           | Bouboui and Gomoka village, Boali town, Central African Republic | 4.89   | 18.14 |
| Whitewater Arroyo mammarenavirus            | 2000                    | Yes <sup>7</sup>  | 2000           | Alameda County, California                  | 37.60 | -121.72 | No                |                |                                     |       |        | No                |                |                                                                  |        |       |
| Mamastrovirus 1                             | 1975                    | Yes <sup>8</sup>  | 1981           | Martin County, California                   | 40.22 | -123.10 | Yes <sup>9</sup>  | 1981           | Guangzhou, Guangdong                | 23.13 | 113.26 | Yes <sup>10</sup> | 1981           | Lebowa, South Africa                                             | -23.5  | 29.5  |
| Mamastrovirus 6                             | 2008                    | Yes <sup>11</sup> | 2009           | St. Louis, Missouri                         | 38.63 | -90.20  | Yes <sup>12</sup> | 2010           | Hong Kong                           | 22.40 | 114.11 | Yes <sup>13</sup> | 2009           | Maiduguri, Borno State, Nigeria                                  | 11.83  | 13.15 |
| Mamastrovirus 8                             | 2009                    | Yes <sup>14</sup> | 2009           | St. Louis, Missouri                         | 38.63 | -90.20  | Yes <sup>15</sup> | 2013           | Nanjing, Jiangsu and Lanzhou, Gansu | 31.95 | 118.78 | Yes <sup>13</sup> | 2009           | Maiduguri, Borno State, Nigeria                                  | 11.83  | 13.15 |
| Mamastrovirus 9                             | 2009                    | Yes <sup>16</sup> | 2009           | Accomack and Northampton Counties, Virginia | 37.71 | -75.81  | Yes <sup>17</sup> | 2019           | Jinan, Shandong                     | 36.68 | 117.11 | Yes <sup>13</sup> | 2009           | Maiduguri, Borno State, Nigeria                                  | 11.83  | 13.15 |
| Mammalian 1 orthobornavirus                 | 1985                    | Yes <sup>18</sup> | 1985           | Philadelphia, Pennsylvania                  | 39.95 | -75.17  | Yes <sup>19</sup> | 1999           | Taiwan                              | 23.70 | 120.96 | Yes <sup>20</sup> | 1992           | Rural area of East Africa                                        | -1.28  | 34.53 |
| Mammalian 2 orthobornavirus                 | 2015                    | No                |                |                                             |       |         | No                |                |                                     |       |        | No                |                |                                                                  |        |       |

|                                                       |      |                    |      |                                  |       |         |                    |      |                    |       |        |                    |      |                                                                |        |       |
|-------------------------------------------------------|------|--------------------|------|----------------------------------|-------|---------|--------------------|------|--------------------|-------|--------|--------------------|------|----------------------------------------------------------------|--------|-------|
| Norwalk virus                                         | 1972 | Yes <sup>21</sup>  | 1972 | Norwalk, Ohio                    | 41.24 | -82.62  | Yes <sup>22</sup>  | 1995 | Henan              | 33.88 | 113.48 | Yes <sup>23</sup>  | 1993 | Pretoria, Gauteng province, South Africa                       | -25.75 | 28.23 |
| Sapporo virus                                         | 1980 | Yes <sup>24</sup>  | 1988 | Houston, Texas                   | 29.76 | -95.37  | Yes <sup>24</sup>  | 1988 | Shanghai           | 31.23 | 121.47 | Yes <sup>25</sup>  | 1997 | Pretoria, Gauteng province, South Africa                       | -25.75 | 28.23 |
| Vesicular exanthema of swine virus                    | 1998 | Yes <sup>26</sup>  | 1998 | Corvallis, Oregon                | 44.56 | -123.26 | No                 |      |                    |       |        | No                 |      |                                                                |        |       |
| Alphacoronavirus 1                                    | 2007 | No                 |      |                                  |       |         | No                 |      |                    |       |        | No                 |      |                                                                |        |       |
| Human coronavirus 229E                                | 1966 | Yes <sup>27</sup>  | 1966 | Chicago, Illinois                | 41.88 | -87.63  | Yes <sup>28</sup>  | 1975 | Kunming, Yunnan    | 25.07 | 102.68 | Yes <sup>29</sup>  | 1998 | Kumasi, Ghana                                                  | 6.70   | -1.62 |
| Human coronavirus NL63                                | 2004 | Yes <sup>30</sup>  | 2005 | New Haven, Connecticut           | 41.31 | -72.93  | Yes <sup>31</sup>  | 2005 | Hong Kong          | 22.40 | 114.11 | Yes <sup>32</sup>  | 2008 | Cape Town, Western Cape Province, South Africa                 | -33.90 | 18.57 |
| Betacoronavirus 1                                     | 1967 | Yes <sup>33</sup>  | 1967 | Bethesda, Maryland               | 38.98 | -77.09  | Yes <sup>31</sup>  | 2005 | Hong Kong          | 22.40 | 114.11 | Yes <sup>34</sup>  | 2011 | Pretoria, Gauteng province, South Africa                       | -25.75 | 28.23 |
| Human coronavirus HKU1                                | 2005 | Yes <sup>35</sup>  | 2006 | New Haven, Connecticut           | 41.31 | -72.92  | Yes <sup>36</sup>  | 2005 | Hong Kong          | 22.40 | 114.11 | Yes <sup>34</sup>  | 2011 | Pretoria, Gauteng province, South Africa                       | -25.75 | 28.23 |
| Middle East respiratory syndrome-related coronavirus  | 2012 | Yes <sup>*37</sup> | 2014 | Lake county, Indiana             | 41.45 | -87.37  | Yes <sup>*38</sup> | 2015 | Huizhou, Guangdong | 23.09 | 114.40 | Yes <sup>*39</sup> | 2014 | Monastir, Tunisia                                              | 35.79  | 10.82 |
| Severe acute respiratory syndrome-related coronavirus | 2003 | Yes <sup>*40</sup> | 2003 | Atlanta, Georgia                 | 33.75 | -84.39  | Yes <sup>41</sup>  | 2003 | Hong Kong          | 22.40 | 114.11 | Yes <sup>42</sup>  | 2004 | Pretoria, Gauteng province, South Africa                       | -25.75 | 28.23 |
| Human torovirus (been abolished)                      | 1984 | No                 |      |                                  |       |         | No                 |      |                    |       |        | No                 |      |                                                                |        |       |
| Bundibugyo ebolavirus                                 | 2008 | No                 |      |                                  |       |         | No                 |      |                    |       |        | Yes <sup>32</sup>  | 2008 | Bundibugyo and Kikyo town, Bundibugyo District, Western Uganda | 0.71   | 30.06 |
| Reston ebolavirus                                     | 1991 | Yes <sup>43</sup>  | 1991 | Reston, Fairfax County, Virginia | 38.96 | -77.35  | No                 |      |                    |       |        | No                 |      |                                                                |        |       |
| Sudan ebolavirus                                      | 1977 | No                 |      |                                  |       |         | No                 |      |                    |       |        | Yes <sup>44</sup>  | 1977 | Maridi, South Sudan                                            | 4.91   | 29.45 |
| Tai Forest ebolavirus                                 | 1995 | No                 |      |                                  |       |         | No                 |      |                    |       |        | Yes <sup>45</sup>  | 1995 | Abidjan, Cote-d'Ivoire                                         | 5.36   | -4.01 |
| Zaire ebolavirus                                      | 1977 | No                 |      |                                  |       |         | No                 |      |                    |       |        | Yes <sup>46</sup>  | 1977 | Yambuku village, Democratic Republic of the Congo              | 2.83   | 22.22 |
| Marburg marburgvirus                                  | 1968 | Yes <sup>*47</sup> | 2009 | Denver county, Colorado          | 39.55 | -105.78 | No                 |      |                    |       |        | Yes <sup>48</sup>  | 1975 | Johannesburg, South Africa                                     | -26.20 | 27.90 |
| Aroa virus                                            | 1971 | No                 |      |                                  |       |         | No                 |      |                    |       |        | No                 |      |                                                                |        |       |
| Bagaza virus                                          | 2009 | No                 |      |                                  |       |         | No                 |      |                    |       |        | No                 |      |                                                                |        |       |
| Banzi virus                                           | 1959 | No                 |      |                                  |       |         | No                 |      |                    |       |        | Yes <sup>49</sup>  | 1959 | Maponde's Kraal(Usutu river), South Africa                     | -26.52 | 31.67 |
| Cacipacore virus                                      | 2011 | No                 |      |                                  |       |         | No                 |      |                    |       |        | No                 |      |                                                                |        |       |
| Dengue virus                                          | 1907 | Yes <sup>50</sup>  | 1914 | Savannah, Georgia                | 32.02 | -81.12  | Yes <sup>51</sup>  | 1967 | Southwest Taiwan   | 23.06 | 120.59 | Yes <sup>52</sup>  | 1927 | Durban, KwaZulu-Natal Province, South Africa                   | -29.86 | 31.02 |

|                                  |      |                    |      |                                                            |       |         |                    |      |                                     |       |        |                   |      |                                                            |        |       |
|----------------------------------|------|--------------------|------|------------------------------------------------------------|-------|---------|--------------------|------|-------------------------------------|-------|--------|-------------------|------|------------------------------------------------------------|--------|-------|
| Edge Hill virus                  | 1985 | No                 |      |                                                            |       |         | No                 |      |                                     |       |        | No                |      |                                                            |        |       |
| Gadgets Gully virus              | 1991 | No                 |      |                                                            |       |         | No                 |      |                                     |       |        | No                |      |                                                            |        |       |
| Ilheus virus                     | 1947 | No                 |      |                                                            |       |         | No                 |      |                                     |       |        | No                |      |                                                            |        |       |
| Japanese encephalitis virus      | 1933 | Yes* <sup>53</sup> | 1953 | Waltham, Massachusetts                                     | 42.38 | -71.24  | Yes <sup>54</sup>  | 1941 | Beijing                             | 40.01 | 116.41 | Yes <sup>55</sup> | 2017 | Cunene, Angola                                             | -16.28 | 15.28 |
| Kokobera virus                   | 1964 | No                 |      |                                                            |       |         | No                 |      |                                     |       |        | No                |      |                                                            |        |       |
| Kyasanur forest disease virus    | 1957 | No                 |      |                                                            |       |         | Yes <sup>56</sup>  | 2009 | Hengduanshan Mountain, Yunnan       | 27.50 | 99.00  | Yes <sup>57</sup> | 2014 | Djibouti, Republic of Djibouti                             | 11.57  | 43.15 |
| Langat virus                     | 1956 | No                 |      |                                                            |       |         | No                 |      |                                     |       |        | No                |      |                                                            |        |       |
| Louping ill virus                | 1934 | Yes <sup>58</sup>  | 1934 | New York                                                   | 40.71 | -74.01  | No                 |      |                                     |       |        | No                |      |                                                            |        |       |
| Murray Valley encephalitis virus | 1952 | No                 |      |                                                            |       |         | No                 |      |                                     |       |        | No                |      |                                                            |        |       |
| Ntaya virus                      | 1952 | No                 |      |                                                            |       |         | No                 |      |                                     |       |        | Yes <sup>59</sup> | 1952 | Bwamba county, Uganda                                      | 0.75   | 30.02 |
| Omsk hemorrhagic fever virus     | 1948 | No                 |      |                                                            |       |         | No                 |      |                                     |       |        | No                |      |                                                            |        |       |
| Powassan virus                   | 1959 | Yes <sup>60</sup>  | 1973 | Middlesex County, New Jersey                               | 40.54 | -74.37  | No                 |      |                                     |       |        | No                |      |                                                            |        |       |
| Rio Bravo virus                  | 1962 | Yes <sup>61</sup>  | 1962 | Dallas city, Texas                                         | 32.78 | -96.80  | No                 |      |                                     |       |        | No                |      |                                                            |        |       |
| Saint Louis encephalitis virus   | 1933 | Yes <sup>62</sup>  | 1933 | St. Louis City, Missouri                                   | 38.63 | -90.20  | No                 |      |                                     |       |        | No                |      |                                                            |        |       |
| Tembusu virus                    | 1975 | No                 |      |                                                            |       |         | Yes <sup>63</sup>  | 2013 | Shandong                            | 36.40 | 118.77 | No                |      |                                                            |        |       |
| Tick-borne encephalitis virus    | 1938 | Yes* <sup>64</sup> | 1979 | Cleveland, Ohio                                            | 41.51 | -81.69  | Yes <sup>65</sup>  | 1956 | Bali village, Wuchang, Heilongjiang | 44.91 | 127.16 | No                |      |                                                            |        |       |
| Uganda S virus                   | 1952 | No                 |      |                                                            |       |         | No                 |      |                                     |       |        | Yes <sup>66</sup> | 1952 | Bwamba county, Uganda                                      | 0.75   | 30.02 |
| Usutu virus                      | 2009 | No                 |      |                                                            |       |         | No                 |      |                                     |       |        | No                |      |                                                            |        |       |
| Wesselsbron virus                | 1957 | No                 |      |                                                            |       |         | No                 |      |                                     |       |        | Yes <sup>67</sup> | 1957 | Lake Simbu region, Maputaland, KwaZulu-Natal, South Africa | -27.36 | 32.32 |
| West Nile virus                  | 1940 | Yes <sup>68</sup>  | 2001 | New York                                                   | 40.71 | -74.01  | Yes <sup>69</sup>  | 2013 | Jiashi County, Xinjiang             | 39.58 | 77.18  | Yes <sup>70</sup> | 1940 | Omogo, West Nile district, Uganda                          | 0.42   | 33.21 |
| Yellow fever virus               | 1901 | Yes <sup>71</sup>  | 1904 | Laredo, Texas                                              | 27.51 | -99.51  | Yes* <sup>72</sup> | 2016 | Beijing                             | 40.01 | 116.41 | Yes <sup>73</sup> | 1928 | Larteh, Ghana                                              | 5.94   | -0.07 |
| Zika virus                       | 1952 | Yes* <sup>74</sup> | 2011 | Northern Colorado                                          | 39.55 | -105.78 | Yes* <sup>75</sup> | 2016 | Gan County, Ganzhou city, Jiangxi   | 25.86 | 115.02 | Yes <sup>76</sup> | 1952 | Zika, Uganda                                               | 0.12   | 32.53 |
| Hepacivirus C                    | 1989 | Yes <sup>77</sup>  | 1989 | Emeryville, California                                     | 37.83 | -122.29 | Yes <sup>78</sup>  | 1990 | Qidong county, Jiangsu              | 31.88 | 121.72 | Yes <sup>79</sup> | 1990 | Johannesburg, South Africa                                 | -26.20 | 27.90 |
| Pegivirus C                      | 1995 | Yes <sup>80</sup>  | 1995 | Chapel Hill, North Carolina; Rochester, Minnesota; Dallas, | 35.91 | -79.06  | Yes <sup>81</sup>  | 1996 | Beijing                             | 40.01 | 116.41 | Yes <sup>80</sup> | 1995 | Cairo, Egypt                                               | 30.04  | 31.24 |

|                                                  |      |                    |      |                                     |       |         |                    |      |                                    |       |        |                    |      |                                                              |        |       |
|--------------------------------------------------|------|--------------------|------|-------------------------------------|-------|---------|--------------------|------|------------------------------------|-------|--------|--------------------|------|--------------------------------------------------------------|--------|-------|
|                                                  |      |                    |      | Texas                               |       |         |                    |      |                                    |       |        |                    |      |                                                              |        |       |
| Pegivirus H                                      | 2015 | Yes <sup>82</sup>  | 2015 | New York city, New York             | 40.71 | -74.01  | Yes <sup>83</sup>  | 2018 | Guangzhou, Guangdong               | 23.13 | 113.26 | Yes <sup>84</sup>  | 2019 | Ebolowa, Cameroon                                            | 2.92   | 11.15 |
| Pestivirus A                                     | 1988 | Yes <sup>85</sup>  | 1989 | Whiteriver, Arizona                 | 33.83 | -109.97 | No                 |      |                                    |       |        | Yes <sup>86</sup>  | 1988 | Zambia                                                       | -13.13 | 27.85 |
| Andes orthohantavirus                            | 1996 | No                 |      |                                     |       |         | No                 |      |                                    |       |        | No                 |      |                                                              |        |       |
| Bayou orthohantavirus                            | 1995 | Yes <sup>87</sup>  | 1995 | Louisiana                           | 30.98 | -91.96  | No                 |      |                                    |       |        | No                 |      |                                                              |        |       |
| Black creek canal orthohantavirus                | 1995 | Yes <sup>88</sup>  | 1995 | Miami-Dade County, Florida          | 25.76 | -80.34  | No                 |      |                                    |       |        | No                 |      |                                                              |        |       |
| Choclo orthohantavirus                           | 2000 | No                 |      |                                     |       |         | No                 |      |                                    |       |        | No                 |      |                                                              |        |       |
| Dobrava-Belgrade orthohantavirus                 | 1992 | No                 |      |                                     |       |         | No                 |      |                                    |       |        | No                 |      |                                                              |        |       |
| Hantaan orthohantavirus                          | 1978 | No                 |      |                                     |       |         | Yes <sup>89</sup>  | 1980 | Zhejiang                           | 29.14 | 119.79 | No                 |      |                                                              |        |       |
| Laguna Negra orthohantavirus                     | 1997 | No                 |      |                                     |       |         | No                 |      |                                    |       |        | No                 |      |                                                              |        |       |
| Puumala orthohantavirus                          | 1980 | No                 |      |                                     |       |         | No                 |      |                                    |       |        | No                 |      |                                                              |        |       |
| Sangassou orthohantavirus                        | 2010 | No                 |      |                                     |       |         | No                 |      |                                    |       |        | Yes <sup>90</sup>  | 2010 | Sangassou village, Macenta district, Forest Guinea           | 8.24   | -9.32 |
| Seoul orthohantavirus                            | 1982 | Yes <sup>91</sup>  | 1987 | Mississippi                         | 32.57 | -89.88  | Yes <sup>92</sup>  | 1982 | Jiangsu                            | 33.14 | 119.79 | Yes <sup>93</sup>  | 1986 | Jos, Nigeria                                                 | 9.90   | 8.86  |
| Sin Nombre orthohantavirus                       | 1993 | Yes <sup>94</sup>  | 1993 | New Mexico                          | 34.52 | -105.87 | No                 |      |                                    |       |        | No                 |      |                                                              |        |       |
| Thailand orthohantavirus                         | 2006 | No                 |      |                                     |       |         | No                 |      |                                    |       |        | No                 |      |                                                              |        |       |
| Thottopalayam thottimvirus                       | 2007 | No                 |      |                                     |       |         | No                 |      |                                    |       |        | No                 |      |                                                              |        |       |
| Tula orthohantavirus                             | 1996 | No                 |      |                                     |       |         | No                 |      |                                    |       |        | No                 |      |                                                              |        |       |
| Orthohepevirus A                                 | 1983 | Yes <sup>95</sup>  | 1987 | Los Angeles County, California      | 34.05 | -118.24 | Yes <sup>96</sup>  | 1989 | Kashi county, Kashi city, Xinjiang | 39.46 | 75.99  | Yes <sup>97</sup>  | 1985 | Medea town, Algeria                                          | 36.26  | 2.75  |
| Orthohepevirus C                                 | 2018 | No                 |      |                                     |       |         | Yes <sup>98</sup>  | 2018 | Hong Kong                          | 22.40 | 114.11 | No                 |      |                                                              |        |       |
| Crimean-Congo haemorrhagic fever orthonairovirus | 1967 | No                 |      |                                     |       |         | Yes <sup>99</sup>  | 1985 | Bachu, southern Xinjiang           | 39.79 | 78.55  | Yes <sup>100</sup> | 1967 | Kisangani, Tshopo province, Democratic Republic of the Congo | 0.53   | 25.19 |
| Dugbe orthonairovirus                            | 1969 | No                 |      |                                     |       |         | No                 |      |                                    |       |        | Yes <sup>101</sup> | 1969 | Ibadan, Nigeria                                              | 7.35   | 3.88  |
| Nairobi sheep disease orthonairovirus            | 1969 | No                 |      |                                     |       |         | No                 |      |                                    |       |        | Yes <sup>102</sup> | 1991 | Mombasa; Malindi; and Kilifi, Coast Province, Kenya          | -3.34  | 39.57 |
| Thiafora orthonairovirus                         | 1989 | No                 |      |                                     |       |         | No                 |      |                                    |       |        | No                 |      |                                                              |        |       |
| Influenza A virus                                | 1933 | Yes <sup>103</sup> | 1935 | Philadelph, Pennsylvania            | 39.95 | -75.17  | Yes <sup>104</sup> | 1950 | Beijing                            | 40.01 | 116.41 | Yes <sup>105</sup> | 1951 | Johannesburg, South Africa and Cape Town, South Africa       | -26.20 | 27.90 |
| Influenza B virus                                | 1940 | Yes <sup>106</sup> | 1940 | Irvington village, Greenburgh town, | 41.03 | -73.87  | Yes <sup>107</sup> | 1957 | Beijing                            | 40.01 | 116.41 | Yes <sup>108</sup> | 1970 | Arusha, Arusha Region, Tanzania                              | -3.37  | 36.69 |

|                                            |      |                    |      |                                 |       |         |                    |      |                         |       |        |                    |      |                                                      |        |        |
|--------------------------------------------|------|--------------------|------|---------------------------------|-------|---------|--------------------|------|-------------------------|-------|--------|--------------------|------|------------------------------------------------------|--------|--------|
|                                            |      |                    |      | Westchester County,<br>New York |       |         |                    |      |                         |       |        |                    |      |                                                      |        |        |
| Influenza C virus                          | 1950 | Yes <sup>109</sup> | 1950 | Ann Arbor city,<br>Michigan     | 42.28 | -83.74  | Yes <sup>110</sup> | 1957 | Beijing                 | 40.01 | 116.41 | Yes <sup>111</sup> | 1968 | Johannesburg, South<br>Africa                        | -26.20 | 27.90  |
| Dhori thogotovirus                         | 1985 | No                 |      |                                 |       |         | No                 |      |                         |       |        | No                 |      |                                                      |        |        |
| Thogoto thogotovirus                       | 1969 | No                 |      |                                 |       |         | No                 |      |                         |       |        | Yes <sup>101</sup> | 1969 | Ibadan, Nigeria                                      | 7.35   | 3.88   |
| Avian orthoavulavirus 1                    | 1943 | Yes <sup>112</sup> | 1943 | Washington, D. C.               | 38.91 | -77.04  | No                 |      |                         |       |        | No                 |      |                                                      |        |        |
| Hendra henipavirus                         | 1995 | No                 |      |                                 |       |         | No                 |      |                         |       |        | No                 |      |                                                      |        |        |
| Nipah henipavirus                          | 1999 | No                 |      |                                 |       |         | No                 |      |                         |       |        | No                 |      |                                                      |        |        |
| Canine morbillivirus                       | 1955 | Yes <sup>113</sup> | 1955 | Buffalo, New York               | 42.89 | -78.88  | No                 |      |                         |       |        | No                 |      |                                                      |        |        |
| Measles morbillivirus                      | 1911 | Yes <sup>114</sup> | 1911 | Washington, D. C.               | 38.91 | -77.04  | Yes <sup>115</sup> | 1958 | Beijing                 | 40.01 | 116.41 | Yes <sup>116</sup> | 1963 | Dakar, Senegal                                       | 14.72  | -17.47 |
| Human respirovirus 1                       | 1958 | Yes <sup>117</sup> | 1958 | Washington, D. C.               | 38.91 | -77.04  | Yes <sup>118</sup> | 1964 | Zhejiang                | 29.14 | 119.79 | Yes <sup>119</sup> | 1963 | Cape Town, Western<br>Cape Province,<br>South Africa | -33.90 | 18.57  |
| Human respirovirus 3                       | 1958 | Yes <sup>117</sup> | 1958 | Washington, D. C.               | 38.91 | -77.04  | Yes <sup>120</sup> | 1987 | Guangzhou,<br>Guangdong | 23.13 | 113.26 | Yes <sup>119</sup> | 1963 | Cape Town, Western<br>Cape Province,<br>South Africa | -33.90 | 18.57  |
| Achimota<br>pararubulavirus 2              | 2013 | No                 |      |                                 |       |         | No                 |      |                         |       |        | Yes <sup>121</sup> | 2013 | Volta, Ghana                                         | 6.05   | 0.37   |
| Human orthorubulavirus<br>2                | 1956 | Yes <sup>122</sup> | 1956 | Cincinnati, Ohio                | 39.10 | -84.51  | Yes <sup>123</sup> | 1975 | Nanjing, Jiangsu        | 31.95 | 118.78 | Yes <sup>124</sup> | 1967 | Accra, Ghana                                         | 5.60   | -0.19  |
| Human orthorubulavirus<br>4                | 1960 | Yes <sup>125</sup> | 1960 | Bethesda, Maryland              | 38.98 | -77.09  | Yes <sup>126</sup> | 2005 | Hong Kong               | 22.40 | 114.11 | Yes <sup>127</sup> | 2010 | Ndiop village, Sine<br>Saloum region,<br>Senegal     | 15.18  | -16.74 |
| Mammalian<br>orthorubulavirus 5            | 1959 | Yes <sup>128</sup> | 1959 | Stanford, California            | 37.42 | -122.17 | No                 |      |                         |       |        | No                 |      |                                                      |        |        |
| Menangle<br>pararubulavirus                | 1998 | No                 |      |                                 |       |         | No                 |      |                         |       |        | No                 |      |                                                      |        |        |
| Mumps orthorubulavirus                     | 1934 | Yes <sup>129</sup> | 1934 | Nashville, Tennessee            | 36.16 | -86.78  | Yes <sup>130</sup> | 1958 | Beijing                 | 40.01 | 116.41 | Yes <sup>131</sup> | 1955 | Johannesburg, South<br>Africa                        | -26.20 | 27.90  |
| Simian orthorubulavirus                    | 1968 | No                 |      |                                 |       |         | No                 |      |                         |       |        | No                 |      |                                                      |        |        |
| Sosuga pararubulavirus                     | 2014 | No                 |      |                                 |       |         | No                 |      |                         |       |        | Yes <sup>132</sup> | 2014 | -                                                    | 3.76   | 32.82  |
| Tioman pararubulavirus                     | 2007 | No                 |      |                                 |       |         | No                 |      |                         |       |        | No                 |      |                                                      |        |        |
| Bunyamwera<br>orthobunyavirus              | 1946 | Yes <sup>133</sup> | 1964 | Southern Florida                | 26.92 | -81.21  | No                 |      |                         |       |        | Yes <sup>134</sup> | 1946 | Bwamba County,<br>Uganda                             | 0.75   | 30.02  |
| Bwamba<br>orthobunyavirus                  | 1941 | No                 |      |                                 |       |         | No                 |      |                         |       |        | Yes <sup>135</sup> | 1941 | Bwamba county,<br>Western Province of<br>Uganda      | 0.75   | 30.02  |
| California encephalitis<br>orthobunyavirus | 1952 | Yes <sup>136</sup> | 1952 | Kern county,<br>California      | 35.49 | -118.86 | Yes <sup>137</sup> | 1984 | Longhua, Shanghai       | 31.22 | 121.43 | Yes <sup>138</sup> | 1961 | Uganda                                               | 1.37   | 32.29  |
| Caraparu<br>orthobunyavirus                | 1961 | No                 |      |                                 |       |         | No                 |      |                         |       |        | No                 |      |                                                      |        |        |

|                                  |      |                    |      |                                       |       |         |                     |      |                      |       |        |                    |      |                                 |       |       |
|----------------------------------|------|--------------------|------|---------------------------------------|-------|---------|---------------------|------|----------------------|-------|--------|--------------------|------|---------------------------------|-------|-------|
| Catu orthobunyavirus             | 1961 | No                 |      |                                       |       |         | No                  |      |                      |       |        | No                 |      |                                 |       |       |
| Guama orthobunyavirus            | 1961 | No                 |      |                                       |       |         | No                  |      |                      |       |        | No                 |      |                                 |       |       |
| Guaroa orthobunyavirus           | 1959 | No                 |      |                                       |       |         | No                  |      |                      |       |        | No                 |      |                                 |       |       |
| Kairi orthobunyavirus            | 1967 | No                 |      |                                       |       |         | No                  |      |                      |       |        | No                 |      |                                 |       |       |
| Madrid orthobunyavirus           | 1964 | No                 |      |                                       |       |         | No                  |      |                      |       |        | No                 |      |                                 |       |       |
| Marituba orthobunyavirus         | 1961 | No                 |      |                                       |       |         | No                  |      |                      |       |        | No                 |      |                                 |       |       |
| Nyando orthobunyavirus           | 1965 | No                 |      |                                       |       |         | No                  |      |                      |       |        | Yes <sup>139</sup> | 1965 | Kisumu, Kenya                   | -0.09 | 34.77 |
| Oriboca orthobunyavirus          | 1961 | No                 |      |                                       |       |         | No                  |      |                      |       |        | No                 |      |                                 |       |       |
| Oropouche orthobunyavirus        | 1961 | No                 |      |                                       |       |         | No                  |      |                      |       |        | No                 |      |                                 |       |       |
| Patois orthobunyavirus           | 1972 | No                 |      |                                       |       |         | No                  |      |                      |       |        | No                 |      |                                 |       |       |
| Shuni orthobunyavirus            | 1975 | No                 |      |                                       |       |         | No                  |      |                      |       |        | Yes <sup>140</sup> | 1975 | Ibadan, Nigeria                 | 7.38  | 3.95  |
| Tacaiuma orthobunyavirus         | 1967 | No                 |      |                                       |       |         | No                  |      |                      |       |        | No                 |      |                                 |       |       |
| Wyeomyia orthobunyavirus         | 1965 | No                 |      |                                       |       |         | No                  |      |                      |       |        | No                 |      |                                 |       |       |
| Candiru phlebovirus              | 1983 | No                 |      |                                       |       |         | No                  |      |                      |       |        | No                 |      |                                 |       |       |
| Punta Toro phlebovirus           | 1970 | No                 |      |                                       |       |         | No                  |      |                      |       |        | No                 |      |                                 |       |       |
| Rift Valley fever phlebovirus    | 1931 | No                 |      |                                       |       |         | Yes* <sup>141</sup> | 2016 | Beijing              | 40.01 | 116.41 | Yes <sup>142</sup> | 1931 | Rift Valley of Kenya Colony     | -0.28 | 36.07 |
| Sandfly fever Naples phlebovirus | 1944 | No                 |      |                                       |       |         | No                  |      |                      |       |        | Yes <sup>143</sup> | 1951 | Cairo, Egypt                    | 30.04 | 31.24 |
| Heartland banyangvirus           | 2012 | Yes <sup>144</sup> | 2012 | Andrew and Nodaway Counties, Missouri | 39.82 | -94.59  | No                  |      |                      |       |        | No                 |      |                                 |       |       |
| Huaiyangshan banyangvirus        | 2011 | No                 |      |                                       |       |         | Yes <sup>145</sup>  | 2011 | Huaiyangshan         | 31.37 | 115.39 | No                 |      |                                 |       |       |
| Uukuniemi phlebovirus            | 1970 | No                 |      |                                       |       |         | No                  |      |                      |       |        | No                 |      |                                 |       |       |
| Human picobirnavirus             | 1988 | Yes <sup>146</sup> | 1993 | Atlanta, Georgia                      | 33.75 | -84.39  | Yes <sup>147</sup>  | 2000 | Lulong County, Hebei | 39.94 | 116.94 | No                 |      |                                 |       |       |
| Equine rhinitis A virus          | 1962 | No                 |      |                                       |       |         | No                  |      |                      |       |        | No                 |      |                                 |       |       |
| Foot-and-mouth disease virus     | 1965 | No                 |      |                                       |       |         | Yes <sup>148</sup>  | 1999 | Guangzhou            | 23.13 | 113.26 | Yes <sup>149</sup> | 2002 | Alexandria Governorate, Egypt   | 30.74 | 29.74 |
| Cardiovirus A                    | 1947 | Yes <sup>150</sup> | 1961 | New Orleans, Louisiana                | 29.95 | -90.07  | Yes <sup>151</sup>  | 2015 | Changchun, Jilin     | 43.87 | 125.34 | Yes <sup>152</sup> | 1948 | Entebbe, Uganda                 | 0.05  | 32.46 |
| Cardiovirus B                    | 1963 | Yes <sup>153</sup> | 2007 | San Diego, California                 | 32.72 | -117.16 | Yes <sup>154</sup>  | 2009 | Lanzhou, Gansu       | 36.06 | 103.79 | Yes <sup>155</sup> | 2009 | Cameroon                        | 5.03  | 12.40 |
| Cosavirus A                      | 2008 | No                 |      |                                       |       |         | Yes <sup>156</sup>  | 2010 | Shanghai             | 31.23 | 121.47 | Yes <sup>157</sup> | 2012 | Maiduguri, Borno State, Nigeria | 11.83 | 13.15 |
| Cosavirus B                      | 2008 | No                 |      |                                       |       |         | Yes <sup>158</sup>  | 2016 | Zhenjiang, Jiangsu   | 32.19 | 119.43 | No                 |      |                                 |       |       |

|                           |      |                    |      |                         |       |         |                    |      |                      |       |        |                    |      |                                                |        |        |
|---------------------------|------|--------------------|------|-------------------------|-------|---------|--------------------|------|----------------------|-------|--------|--------------------|------|------------------------------------------------|--------|--------|
| Cosavirus D               | 2008 | No                 |      |                         |       |         | No                 |      |                      |       |        | Yes <sup>157</sup> | 2012 | Maiduguri, Borno State, Nigeria                | 11.83  | 13.15  |
| Cosavirus E               | 2008 | No                 |      |                         |       |         | No                 |      |                      |       |        | Yes <sup>157</sup> | 2012 | Maiduguri, Borno State, Nigeria                | 11.83  | 13.15  |
| Cosavirus F               | 2012 | No                 |      |                         |       |         | No                 |      |                      |       |        | No                 |      |                                                |        |        |
| Enterovirus A             | 1949 | Yes <sup>159</sup> | 1949 | New York                | 43.30 | -74.22  | Yes <sup>160</sup> | 1985 | Tianjin              | 39.34 | 117.36 | Yes <sup>151</sup> | 1955 | Johannesburg, South Africa                     | -26.20 | 27.90  |
| Enterovirus B             | 1949 | Yes <sup>159</sup> | 1949 | Wilmington              | 39.74 | -75.54  | Yes <sup>161</sup> | 1960 | Fuzhou, Fujian       | 26.07 | 119.30 | Yes <sup>162</sup> | 1953 | Middelburg, Transvaal, South Africa            | -25.77 | 29.46  |
| Enterovirus C             | 1909 | Yes <sup>163</sup> | 1909 | New York city, New York | 40.71 | -74.01  | Yes                | 1941 | Bejing               | 39.90 | 116.41 | Yes <sup>164</sup> | 1933 | Monrovia, Liberia                              | 6.29   | -10.76 |
| Enterovirus D             | 1967 | Yes <sup>165</sup> | 1967 | Berkeley, California    | 37.87 | -122.27 | Yes <sup>166</sup> | 1979 | Shanghai             | 31.23 | 121.47 | Yes <sup>167</sup> | 1973 | Morocco                                        | 31.79  | -7.09  |
| Enterovirus E             | 1961 | Yes <sup>168</sup> | 1961 | Denver, Colorado        | 39.74 | -104.99 | No                 |      |                      |       |        | No                 |      |                                                |        |        |
| Enterovirus H             | 1965 | No                 |      |                         |       |         | No                 |      |                      |       |        | No                 |      |                                                |        |        |
| Rhinovirus A              | 1953 | Yes <sup>169</sup> | 1956 | Baltimore, Maryland     | 39.29 | -76.61  | Yes <sup>170</sup> | 1975 | Guangzhou, Guangdong | 23.13 | 113.26 | Yes <sup>171</sup> | 1963 | Cape Town, Western Cape Province, South Africa | -33.90 | 18.57  |
| Rhinovirus B              | 1960 | Yes <sup>172</sup> | 1961 | Chicago, Illinois       | 41.88 | -87.63  | Yes <sup>173</sup> | 2008 | Beijing              | 40.01 | 116.41 | Yes <sup>174</sup> | 2008 | Pretoria, Gauteng province, South Africa       | -25.75 | 28.23  |
| Rhinovirus C              | 2006 | Yes <sup>175</sup> | 2006 | New York city, New York | 40.71 | -74.01  | Yes <sup>176</sup> | 2007 | Hong Kong            | 22.40 | 114.11 | Yes <sup>174</sup> | 2008 | Pretoria, Gauteng province, South Africa       | -25.75 | 28.23  |
| Erbovirus A               | 2005 | No                 |      |                         |       |         | No                 |      |                      |       |        | No                 |      |                                                |        |        |
| Hepatovirus A             | 1973 | Yes <sup>177</sup> | 1973 | Bethesda, Maryland      | 38.98 | -77.09  | Yes <sup>178</sup> | 1978 | Shanghai             | 31.23 | 121.47 | Yes <sup>179</sup> | 1977 | Dakar, Senegal                                 | 14.72  | -17.47 |
| Aichivirus A              | 1991 | Yes <sup>180</sup> | 2013 | Cincinnati, Ohio        | 39.10 | -84.51  | Yes <sup>181</sup> | 2009 | Shanghai             | 31.23 | 121.47 | Yes <sup>182</sup> | 2008 | Monastir, Tunisia                              | 35.77  | 10.82  |
| Parechovirus A            | 1958 | Yes <sup>183</sup> | 1958 | Cincinnati, Ohio        | 39.10 | -84.51  | Yes <sup>184</sup> | 2009 | Shanghai             | 31.23 | 121.47 | Yes <sup>157</sup> | 2012 | Ouagadougou, Burkina Faso                      | 12.24  | -1.56  |
| Parechovirus B            | 2003 | No                 |      |                         |       |         | No                 |      |                      |       |        | No                 |      |                                                |        |        |
| Salivirus A               | 2009 | Yes <sup>185</sup> | 2009 | Northern California     | 38.84 | -120.90 | Yes <sup>186</sup> | 2010 | Shanghai             | 31.23 | 121.47 | Yes <sup>187</sup> | 2009 | Maiduguri, Borno State, Nigeria                | 11.83  | 13.15  |
| Avian metapneumovirus     | 2011 | Yes <sup>188</sup> | 2011 | Memphis, Tennessee      | 35.15 | -90.05  | No                 |      |                      |       |        | No                 |      |                                                |        |        |
| Human metapneumovirus     | 2001 | Yes <sup>189</sup> | 2003 | Rochester, New York     | 43.16 | -77.61  | Yes <sup>190</sup> | 2003 | Hong Kong            | 22.40 | 114.11 | Yes <sup>191</sup> | 2003 | Johannesburg, South Africa                     | -26.20 | 27.90  |
| Human orthopneumovirus    | 1957 | Yes <sup>192</sup> | 1957 | Baltimore, Maryland     | 39.29 | -76.61  | Yes <sup>193</sup> | 1975 | Kunming, Yunnan      | 25.07 | 102.68 | Yes <sup>194</sup> | 1965 | Cape Town, Western Cape Province, South Africa | -33.90 | 18.57  |
| Colorado tick fever virus | 1946 | Yes <sup>195</sup> | 1946 | Denver, Colorado        | 39.74 | -104.99 | Yes <sup>196</sup> | 1996 | Nanjing, Jiangsu     | 31.95 | 118.78 | No                 |      |                                                |        |        |
| Eyach virus               | 1980 | No                 |      |                         |       |         | No                 |      |                      |       |        | No                 |      |                                                |        |        |
| Corriparta virus          | 1967 | No                 |      |                         |       |         | No                 |      |                      |       |        | No                 |      |                                                |        |        |
| Great Island virus        | 1963 | No                 |      |                         |       |         | No                 |      |                      |       |        | No                 |      |                                                |        |        |



|                                       |      |                     |      |                          |       |         |                     |      |                                |       |        |                    |      |                                                              |        |        |
|---------------------------------------|------|---------------------|------|--------------------------|-------|---------|---------------------|------|--------------------------------|-------|--------|--------------------|------|--------------------------------------------------------------|--------|--------|
| Lebombo virus                         | 1975 | No                  |      |                          |       |         | No                  |      |                                |       |        | Yes <sup>140</sup> | 1975 | Ibadan, Nigeria                                              | 7.38   | 3.95   |
| Orungo virus                          | 1976 | No                  |      |                          |       |         | No                  |      |                                |       |        | Yes <sup>197</sup> | 1976 | Ibadan, Nigeria                                              | 7.38   | 3.95   |
| Mammalian orthoreovirus               | 1954 | Yes <sup>198</sup>  | 1954 | Cincinnati, Ohio         | 39.10 | -84.51  | Yes <sup>199</sup>  | 1995 | Xuzhou, Jiangsu                | 34.26 | 117.19 | Yes <sup>200</sup> | 1963 | Johannesburg, South Africa                                   | -26.20 | 27.90  |
| Nelson Bay orthoreovirus              | 2007 | No                  |      |                          |       |         | Yes* <sup>201</sup> | 2009 | Hong Kong                      | 22.40 | 114.11 | No                 |      |                                                              |        |        |
| Rotavirus A                           | 1973 | Yes <sup>202</sup>  | 1976 | Washington, D. C.        | 38.90 | -77.04  | Yes <sup>203</sup>  | 1979 | Beijing                        | 40.01 | 116.41 | Yes <sup>197</sup> | 1976 | Johannesburg, South Africa                                   | -26.20 | 27.90  |
| Rotavirus B                           | 1984 | Yes <sup>204</sup>  | 1985 | Baltimore, Maryland      | 39.29 | -76.61  | Yes <sup>205</sup>  | 1984 | Jinzhou, Liaoning              | 41.10 | 121.13 | Yes <sup>206</sup> | 1987 | Kenya                                                        | -0.02  | 37.91  |
| Rotavirus C                           | 1986 | Yes <sup>207</sup>  | 1995 | Providence, Rhode Island | 41.82 | -71.41  | Yes <sup>208</sup>  | 1999 | Beijing                        | 40.01 | 116.41 | Yes <sup>209</sup> | 1999 | Pretoria, Gauteng province, South Africa                     | -25.75 | 28.23  |
| Rotavirus H                           | 1987 | No                  |      |                          |       |         | Yes <sup>210</sup>  | 1987 | Huaihua, Hunan Province        | 27.55 | 109.96 | No                 |      |                                                              |        |        |
| Banna virus                           | 1990 | No                  |      |                          |       |         | Yes <sup>211</sup>  | 1990 | Xishuangbanna, Yunnan Province | 21.90 | 100.80 | No                 |      |                                                              |        |        |
| Primate T-lymphotropic virus 1        | 1980 | Yes <sup>212</sup>  | 1980 | Bethesda, Maryland       | 38.98 | -77.09  | Yes <sup>205</sup>  | 1984 | Shenyang, Liaoning             | 41.80 | 123.38 | Yes <sup>213</sup> | 1984 | Ibadan, Nigeria                                              | 7.38   | 3.95   |
| Primate T-lymphotropic virus 2        | 1982 | Yes <sup>214</sup>  | 1982 | Seattle, Washington      | 47.61 | -122.33 | Yes <sup>215</sup>  | 2013 | Henan and Hubei                | 32.21 | 112.96 | Yes <sup>216</sup> | 1991 | Franceville, Gabon                                           | -1.63  | 13.60  |
| Primate T-lymphotropic virus 3        | 2005 | No                  |      |                          |       |         | No                  |      |                                |       |        | Yes <sup>217</sup> | 2005 | Océan department, South Province, Cameroon                   | 2.50   | 10.50  |
| Human immunodeficiency virus 1        | 1983 | Yes <sup>218</sup>  | 1984 | Washington, D. C.        | 38.90 | -77.04  | Yes <sup>219</sup>  | 1986 | Hong Kong                      | 22.40 | 114.11 | Yes <sup>220</sup> | 1984 | Kisangani, Tshopo province, Democratic Republic of the Congo | 0.53   | 25.19  |
| Human immunodeficiency virus 2        | 1986 | Yes* <sup>221</sup> | 1988 | New Jersey               | 40.06 | -74.41  | Yes* <sup>222</sup> | 2000 | Fuzhou, Fujian                 | 26.07 | 119.30 | Yes <sup>223</sup> | 1986 | Dakar, Senegal                                               | 14.72  | -17.47 |
| Simian immunodeficiency virus         | 1992 | Yes <sup>224</sup>  | 1992 | Atlanta, Georgia         | 33.75 | -84.39  | No                  |      |                                |       |        | Yes <sup>217</sup> | 2005 | Cameroon                                                     | 7.37   | 12.35  |
| Central chimpanzee simian foamy virus | 2012 | No                  |      |                          |       |         | No                  |      |                                |       |        | Yes <sup>225</sup> | 2012 | Near Dja Nature Reserves, Southern Cameroon                  | 4.50   | 13.50  |
| Eastern chimpanzee simian foamy virus | 1971 | No                  |      |                          |       |         | No                  |      |                                |       |        | Yes <sup>226</sup> | 1971 | Kenya                                                        | -0.02  | 37.91  |
| Grivet simian foamy virus             | 1997 | No                  |      |                          |       |         | No                  |      |                                |       |        | No                 |      |                                                              |        |        |
| Guenon simian foamy virus             | 2012 | No                  |      |                          |       |         | No                  |      |                                |       |        | Yes <sup>225</sup> | 2012 | Near Iolodrof, Southern Cameroon                             | 3.23   | 10.73  |
| Taiwanese macaque simian foamy virus  | 2002 | No                  |      |                          |       |         | Yes <sup>227</sup>  | 2012 | Yunnan                         | 25.18 | 101.86 | No                 |      |                                                              |        |        |
| Australian bat lyssavirus             | 1998 | No                  |      |                          |       |         | No                  |      |                                |       |        | No                 |      |                                                              |        |        |
| Duvenhage lyssavirus                  | 1971 | No                  |      |                          |       |         | No                  |      |                                |       |        | Yes <sup>228</sup> | 1971 | Pretoria, Gauteng province, South Africa                     | -25.75 | 28.23  |
| European bat Yeslyssavirus            | 1989 | No                  |      |                          |       |         | No                  |      |                                |       |        | No                 |      |                                                              |        |        |
| European bat 2                        | 1986 | No                  |      |                          |       |         | No                  |      |                                |       |        | No                 |      |                                                              |        |        |

|                                   |      |                     |      |                                              |       |         |                    |      |                        |       |        |                    |      |                                                                             |        |       |  |
|-----------------------------------|------|---------------------|------|----------------------------------------------|-------|---------|--------------------|------|------------------------|-------|--------|--------------------|------|-----------------------------------------------------------------------------|--------|-------|--|
| lyssavirus                        |      |                     |      |                                              |       |         |                    |      |                        |       |        |                    |      |                                                                             |        |       |  |
| Irkut lyssavirus                  | 2013 | No                  |      |                                              |       |         | Yes <sup>229</sup> | 2013 | Tonghua county, Jilin  | 41.68 | 125.76 | No                 |      |                                                                             |        |       |  |
| Mokola lyssavirus                 | 1972 | No                  |      |                                              |       |         | No                 |      |                        |       |        | Yes <sup>230</sup> | 1972 | Ibadan, Nigeria                                                             | 7.38   | 3.95  |  |
| Rabies lyssavirus                 | 1903 | Yes <sup>231</sup>  | 1910 | Southern California                          | 34.57 | -116.76 | Yes <sup>232</sup> | 1981 | Beijing                | 40.01 | 116.41 | Yes <sup>233</sup> | 1933 | Carolina, Mpumalanga, South Africa                                          | -26.07 | 30.12 |  |
| Bas-Congo tibrovirus              | 2012 | No                  |      |                                              |       |         | No                 |      |                        |       |        | Yes <sup>234</sup> | 2012 | Mangala village, Boma Bungu Health Zone, Democratic Republic of Congo (DRC) | -4.04  | 21.76 |  |
| Ekpoma Yestibrovirus              | 2015 | No                  |      |                                              |       |         | No                 |      |                        |       |        | Yes <sup>235</sup> | 2015 | Irrua, Edo State, Nigeria                                                   | 6.74   | 6.22  |  |
| Ekpoma 2 tibrovirus               | 2015 | No                  |      |                                              |       |         | No                 |      |                        |       |        | Yes <sup>235</sup> | 2015 | Irrua, Edo State, Nigeria                                                   | 6.74   | 6.22  |  |
| Alagoas vesiculovirus             | 1967 | No                  |      |                                              |       |         | No                 |      |                        |       |        | No                 |      |                                                                             |        |       |  |
| Chandipura vesiculovirus          | 1967 | No                  |      |                                              |       |         | No                 |      |                        |       |        | No                 |      |                                                                             |        |       |  |
| Cocal vesiculovirus               | 1964 | No                  |      |                                              |       |         | No                 |      |                        |       |        | No                 |      |                                                                             |        |       |  |
| Indiana vesiculovirus             | 1958 | Yes <sup>236</sup>  | 1958 | Beltsville, Prince George's County, Maryland | 39.05 | -76.90  | No                 |      |                        |       |        | No                 |      |                                                                             |        |       |  |
| Isfahan vesiculovirus             | 1977 | No                  |      |                                              |       |         | No                 |      |                        |       |        | No                 |      |                                                                             |        |       |  |
| Maraba vesiculovirus              | 1984 | No                  |      |                                              |       |         | No                 |      |                        |       |        | No                 |      |                                                                             |        |       |  |
| New Jersey vesiculovirus          | 1950 | Yes <sup>237</sup>  | 1950 | Madison, Wisconsin                           | 43.07 | -89.40  | No                 |      |                        |       |        | No                 |      |                                                                             |        |       |  |
| Piry vesiculovirus                | 1974 | No                  |      |                                              |       |         | No                 |      |                        |       |        | No                 |      |                                                                             |        |       |  |
| Barmah Forest virus               | 1986 | No                  |      |                                              |       |         | No                 |      |                        |       |        | No                 |      |                                                                             |        |       |  |
| Chikungunya virus                 | 1956 | Yes* <sup>238</sup> | 2006 | Minnesota                                    | 46.44 | -93.36  | Yes <sup>51</sup>  | 1967 | Southwest Taiwan       | 23.06 | 120.59 | Yes <sup>239</sup> | 1956 | Newala district, Tanzania                                                   | -10.64 | 39.24 |  |
| Eastern equine encephalitis virus | 1938 | Yes <sup>240</sup>  | 1938 | Southwestern Massachusetts                   | 42.19 | -73.09  | No                 |      |                        |       |        | No                 |      |                                                                             |        |       |  |
| Everglades virus                  | 1970 | Yes <sup>241</sup>  | 1970 | Homestead, Florida                           | 25.47 | -80.48  | No                 |      |                        |       |        | No                 |      |                                                                             |        |       |  |
| Getah virus                       | 1966 | No                  |      |                                              |       |         | Yes <sup>242</sup> | 1992 | Baoting County, Hainan | 18.98 | 109.83 | No                 |      |                                                                             |        |       |  |
| Highlands J virus                 | 2000 | Yes <sup>243</sup>  | 2000 | Florida                                      | 27.66 | -81.52  | No                 |      |                        |       |        | No                 |      |                                                                             |        |       |  |
| Madariaga virus                   | 1972 | No                  |      |                                              |       |         | No                 |      |                        |       |        | No                 |      |                                                                             |        |       |  |
| Mayaro virus                      | 1957 | Yes* <sup>244</sup> | 1999 | Ohio                                         | 40.42 | -82.91  | No                 |      |                        |       |        | No                 |      |                                                                             |        |       |  |
| Mosso das Pedras virus            | 2013 | No                  |      |                                              |       |         | No                 |      |                        |       |        | No                 |      |                                                                             |        |       |  |

|                                      |      |                    |      |                    |       |         |                    |      |                    |       |        |                    |      |                                                |        |       |
|--------------------------------------|------|--------------------|------|--------------------|-------|---------|--------------------|------|--------------------|-------|--------|--------------------|------|------------------------------------------------|--------|-------|
| Mucambo virus                        | 1965 | No                 |      |                    |       |         | No                 |      |                    |       |        | No                 |      |                                                |        |       |
| Ndumu virus                          | 1961 | No                 |      |                    |       |         | No                 |      |                    |       |        | Yes <sup>245</sup> | 1961 | Ndumu, Maputaland, KwaZulu-Natal, South Africa | -26.93 | 32.26 |
| Onyong-nyong virus                   | 1961 | No                 |      |                    |       |         | No                 |      |                    |       |        | Yes <sup>246</sup> | 1961 | Entebbe, Uganda                                | 0.05   | 32.46 |
| Pixuna virus                         | 1991 | No                 |      |                    |       |         | No                 |      |                    |       |        | No                 |      |                                                |        |       |
| Rio Negro virus                      | 1993 | No                 |      |                    |       |         | No                 |      |                    |       |        | No                 |      |                                                |        |       |
| Ross River virus                     | 1972 | No                 |      |                    |       |         | Yes <sup>247</sup> | 1999 | Hainan             | 19.16 | 109.94 | No                 |      |                                                |        |       |
| Semliki Forest virus                 | 1979 | No                 |      |                    |       |         | No                 |      |                    |       |        | Yes <sup>248</sup> | 1990 | Bangui, Central Africa                         | 4.36   | 18.58 |
| Sindbis virus                        | 1955 | No                 |      |                    |       |         | No                 |      |                    |       |        | Yes <sup>249</sup> | 1955 | Cairo, Egypt                                   | 30.04  | 31.24 |
| Tonate virus                         | 1976 | No                 |      |                    |       |         | No                 |      |                    |       |        | No                 |      |                                                |        |       |
| Una virus                            | 1963 | No                 |      |                    |       |         | No                 |      |                    |       |        | No                 |      |                                                |        |       |
| Venezuelan equine encephalitis virus | 1943 | Yes <sup>250</sup> | 1943 | New York           | 40.71 | -74.01  | No                 |      |                    |       |        | No                 |      |                                                |        |       |
| Western equine encephalitis virus    | 1938 | Yes <sup>240</sup> | 1938 | Fresno, California | 36.75 | -119.77 | No                 |      |                    |       |        | No                 |      |                                                |        |       |
| Whataroa virus                       | 1964 | No                 |      |                    |       |         | No                 |      |                    |       |        | No                 |      |                                                |        |       |
| Rubella virus                        | 1942 | Yes <sup>251</sup> | 1942 | Washington, D. C.  | 38.91 | -77.04  | Yes <sup>252</sup> | 1979 | Hangzhou, Zhejiang | 29.87 | 119.33 | Yes <sup>253</sup> | 1963 | Cape Town, Western Cape Province, South Africa | -33.90 | 18.57 |
| Hepatitis delta virus                | 1977 | Yes <sup>254</sup> | 1979 | New Jersey         | 40.06 | -74.41  | Yes <sup>255</sup> | 1980 | Taipei, Taiwan     | 24.96 | 121.51 | Yes <sup>256</sup> | 1984 | Harare, Zimbabwe                               | -17.83 | 31.03 |

4 Notes: Yes denotes the virus was ever discovered from the region; \* denotes the virus was ever discovered from the region, but imported from other regions; No denotes the  
5 virus species has never been discovered from the region; The lat and long denote the coordinate of discovery points or centroids of polygons

6 **Table 2S Resolution and covered grid cells for virus discovery data**

|               |                     | Polygon data  |                      |                   | Point data | Total |
|---------------|---------------------|---------------|----------------------|-------------------|------------|-------|
|               |                     | Country level | State/Province level | City/County level |            |       |
| United States | Virus counts        | NA            | 14 (14.7%)           | 11 (11.6%)        | 70 (73.7%) | 95    |
|               | Gridded cell counts | NA            | 189                  | 12                | 72*        | 273   |
| China         | Virus counts        | NA            | 22 (27.5%)           | 47 (58.7%)        | 11 (13.8%) | 80    |
|               | Gridded cell counts | NA            | 161                  | 70                | 12*        | 243   |
|               | Virus counts        | 7 (6.5)       | 5 (4.7%)             | 15 (14.0%)        | 80 (74.8%) | 107   |
| Africa        | Gridded cell counts | 307           | 22                   | 17                | 80         | 426   |

7 \*Grid cell counts here include viruses first detected in multiple points from the literature, NA, not applicable

8 **Table 3S Model parameters**

| Model         | Tree complexity | Learning rate | Bag fraction | No. of trees |
|---------------|-----------------|---------------|--------------|--------------|
| United States | 2               | 0.0020        | 0.5          | 1430         |
| China         | 2               | 0.0035        | 0.5          | 1473         |
| Africa        | 2               | 0.0030        | 0.5          | 1446         |

9 **Table 4S Model validation statistics for analyses in three regions**

| Model         | % of deviance explained (95% quantiles) | ICC (95% quantiles) |
|---------------|-----------------------------------------|---------------------|
| United States | 50.5% (44.3%–56.8%)                     | 0.66 (0.60–0.70)    |
| China         | 42.0% (32.4%–50.8%)                     | 0.52 (0.41–0.60)    |
| Africa        | 42.4% (34.2%–50.0%)                     | 0.51 (0.44–0.62)    |

10 ICC, intraclass correlation coefficient

11 *Supplementary Figures*

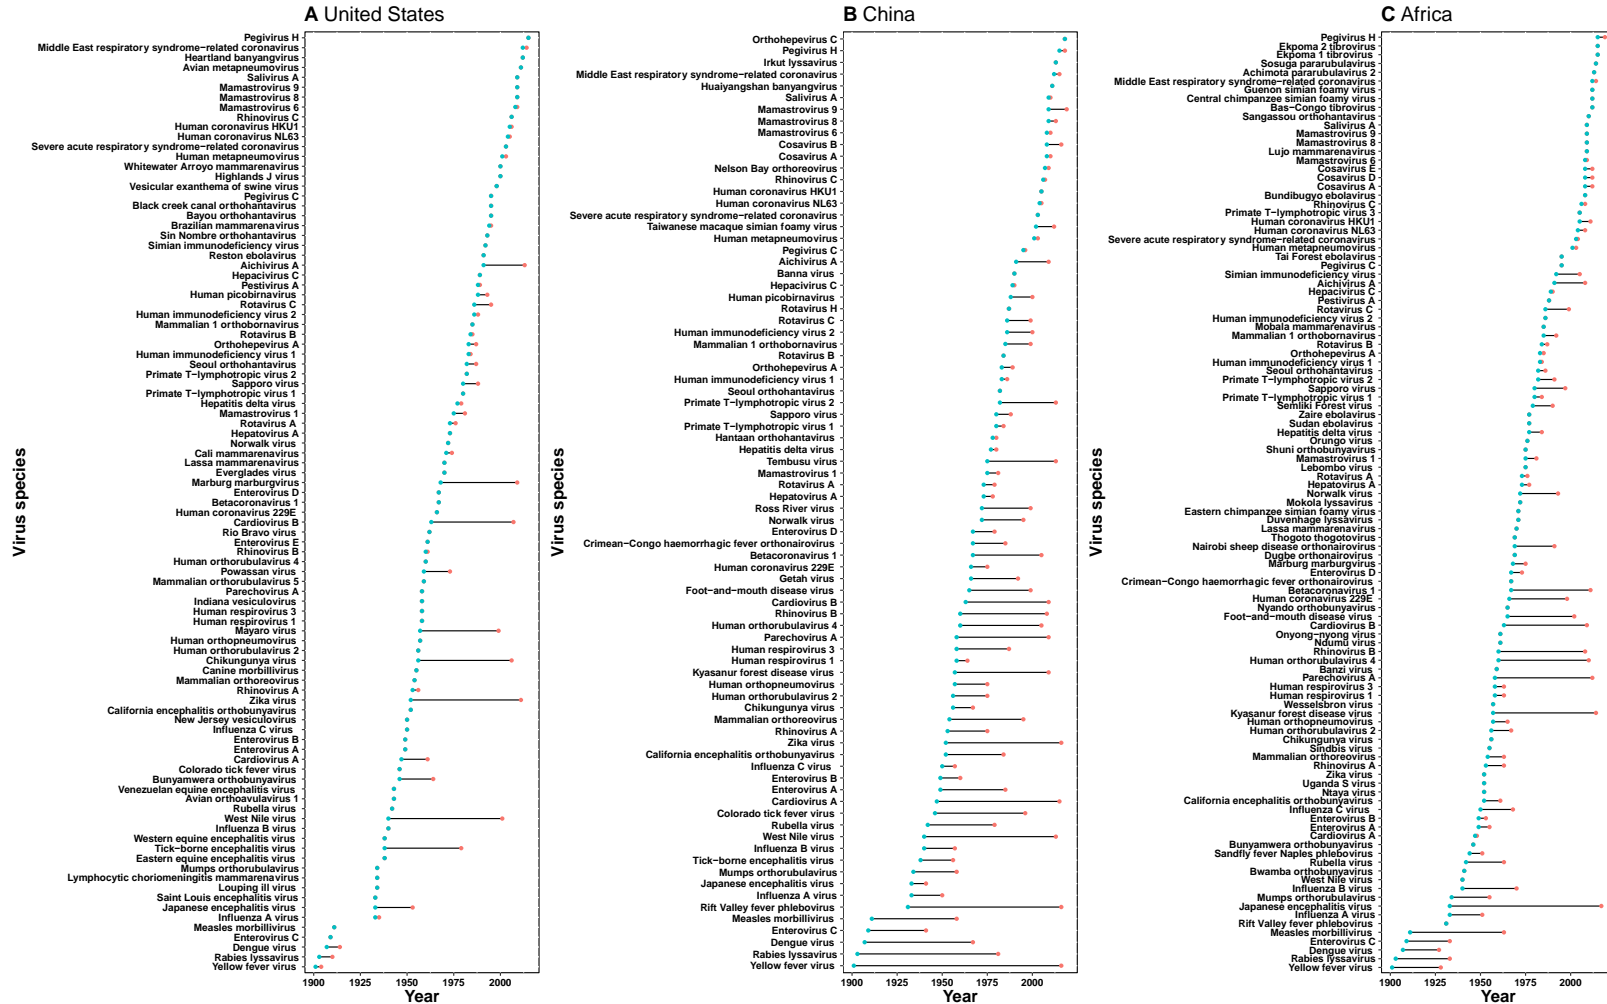

12  
13  
14  
15

**Figure 1S Time lag of human-infective RNA virus discovery between the three regions and the world. A, United States. B, China. C, Africa. The blue dots represent the original discovery year of each virus in the world; the red dots represent the discovery year of each virus in three regions; and the segments between them represent the time lag.**

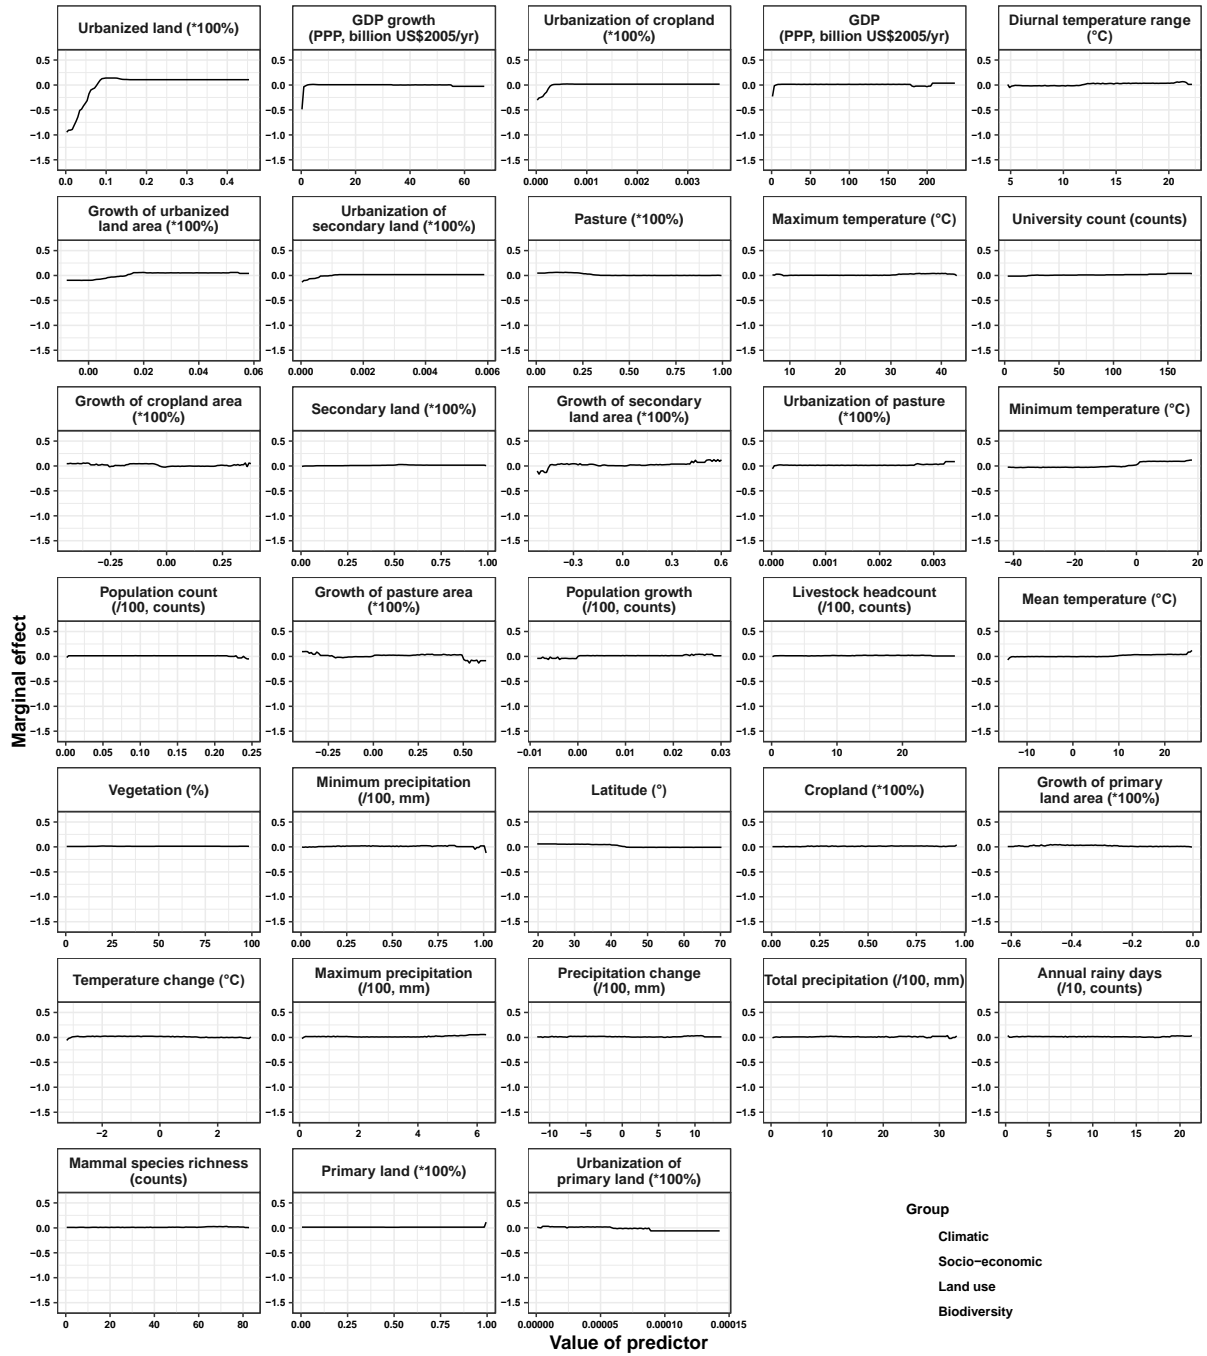

16  
17  
18  
19  
20  
21

**Figure 2S Partial dependence plots showing the influence of human-infective RNA virus discovery for all predictors in the United States.** Partial dependence plots show the effect of an individual explanatory factor over its range on the response after factoring out other explanatory factors. Fitted lines represent the median (black) and 95% quantiles (coloured) based on 1000 replicated models. Y axes are centred around the mean without scaling. X axes show the range of sampled values of explanatory factors.

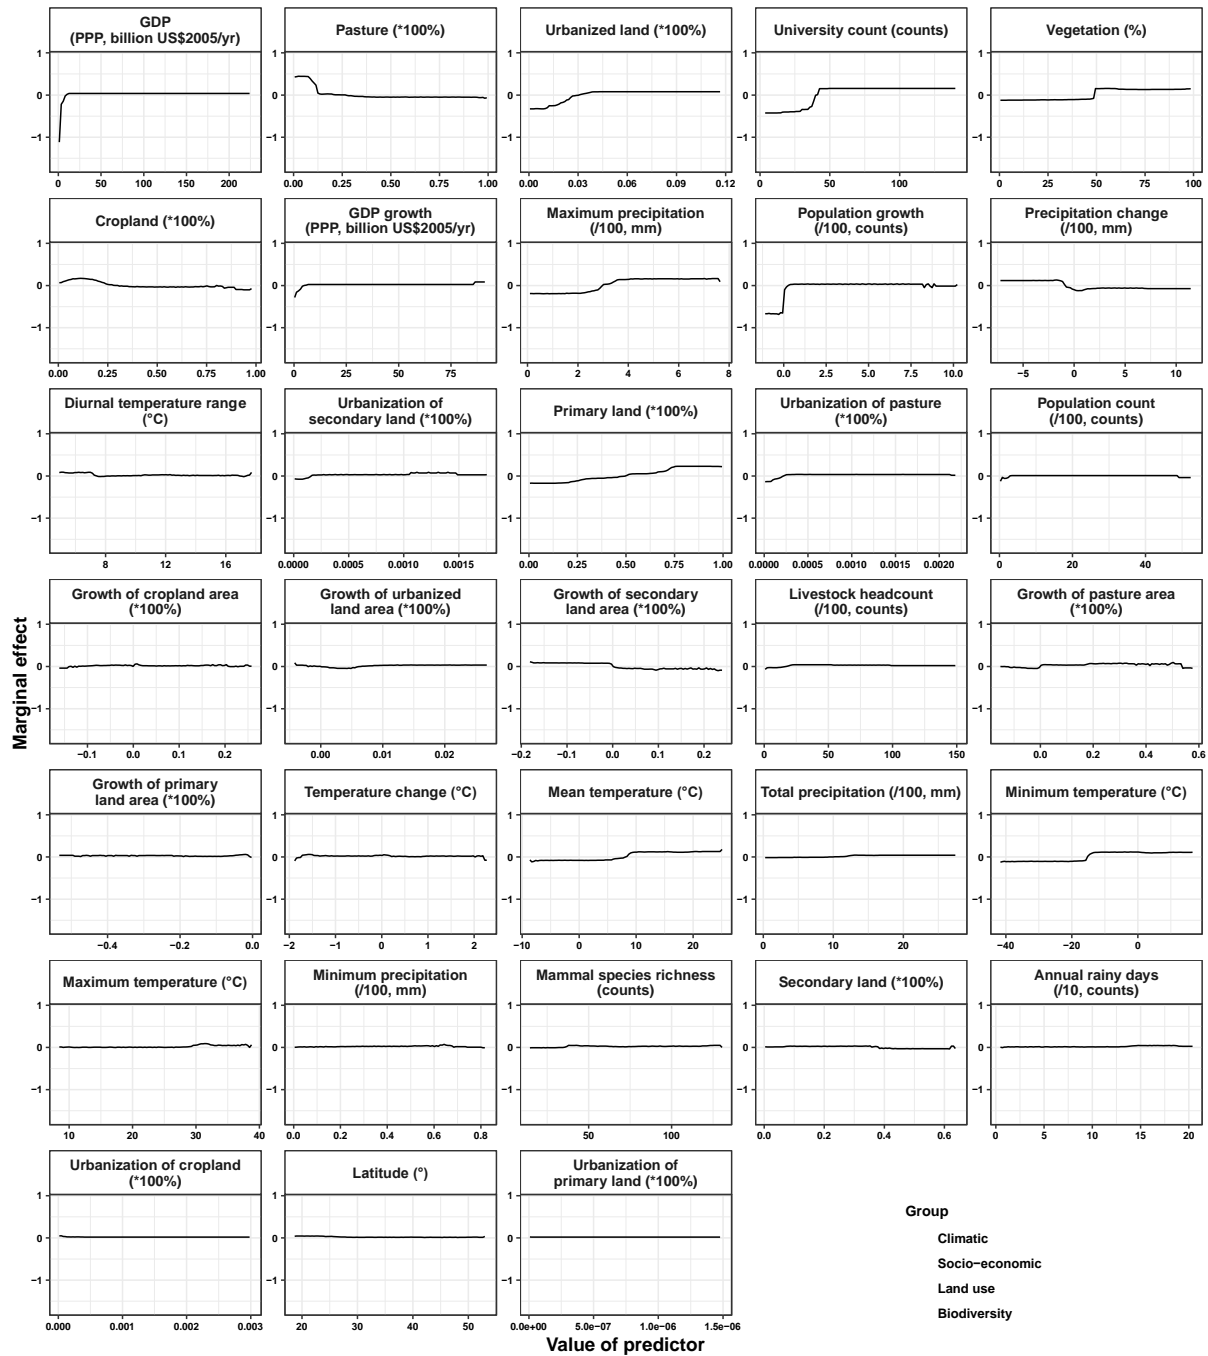

22  
23  
24  
25  
26  
27

**Figure 3S Partial dependence plots showing the influence of human-infective RNA virus discovery for all risk factors in China.** Partial dependence plots show the effect of an individual explanatory factor over its range on the response after factoring out other explanatory factors. Fitted lines represent the median (black) and 95% quantiles (coloured) based on 1000 replicated models. Y axes are centred around the mean without scaling. X axes show the range of sampled values of explanatory factors.

28

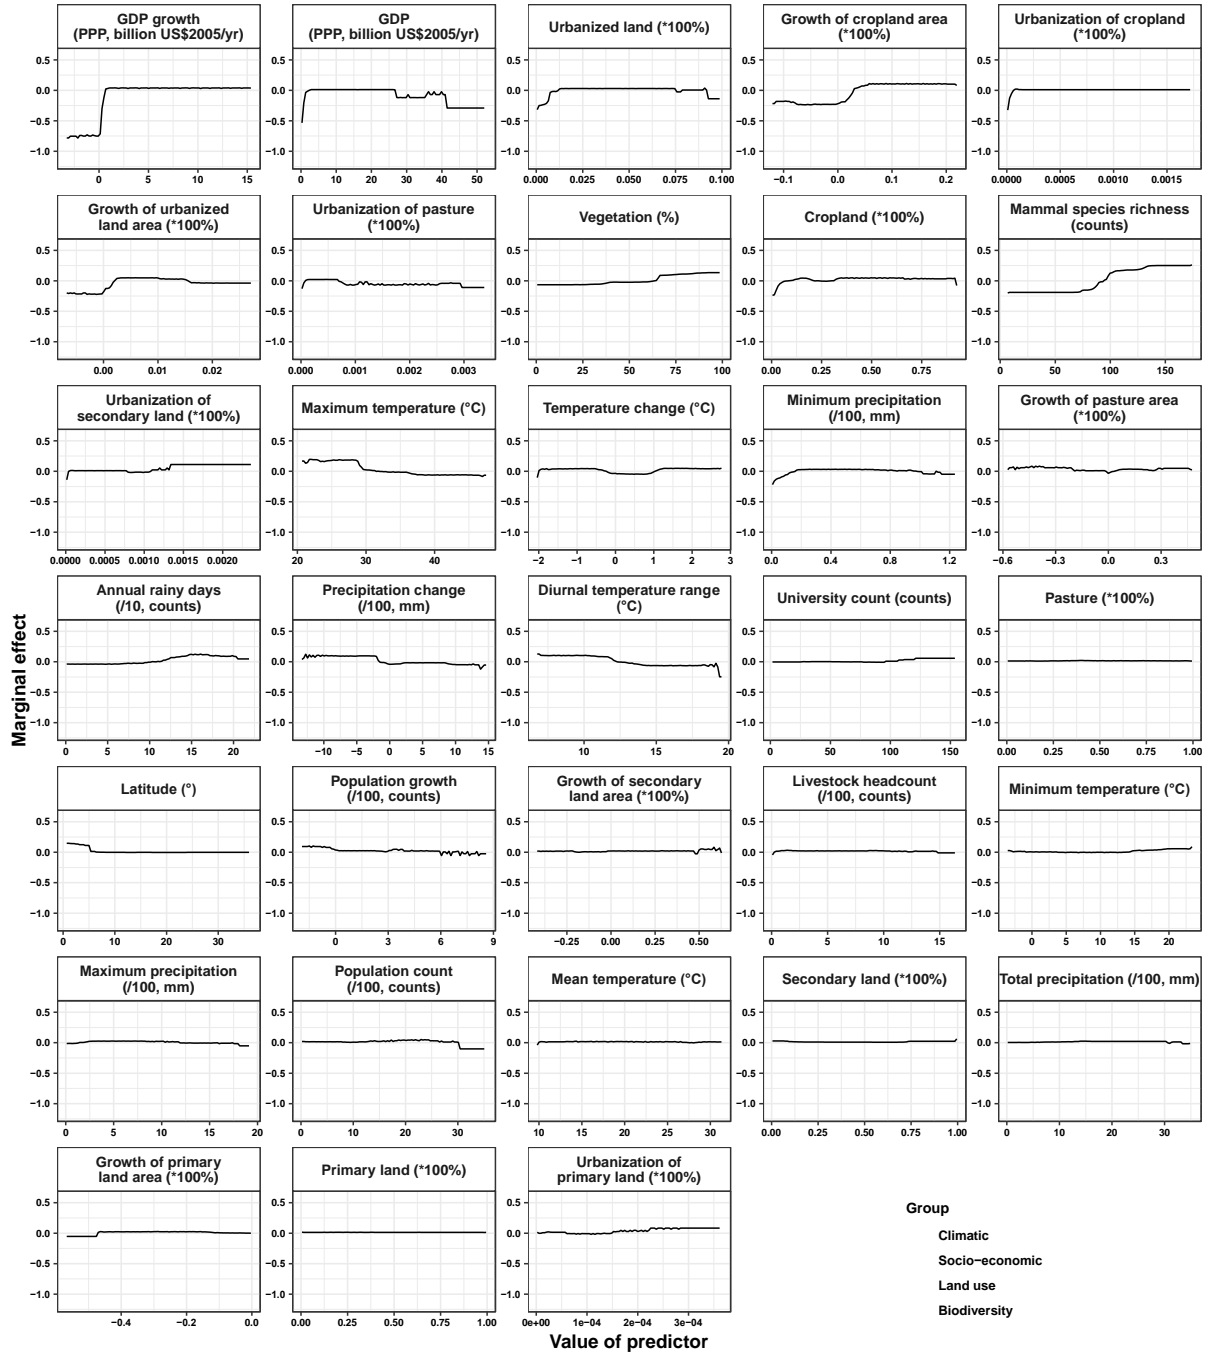

29  
30  
31  
32  
33  
34

**Figure 4S Partial dependence plots showing the influence of human-infective RNA virus discovery for all risk factors in Africa.** Partial dependence plots show the effect of an individual explanatory factor over its range on the response after factoring out other explanatory factors. Fitted lines represent the median (black) and 95% quantiles (coloured) based on 1000 replicated models. Y axes are centred around the mean without scaling. X axes show the range of sampled values of explanatory factors.



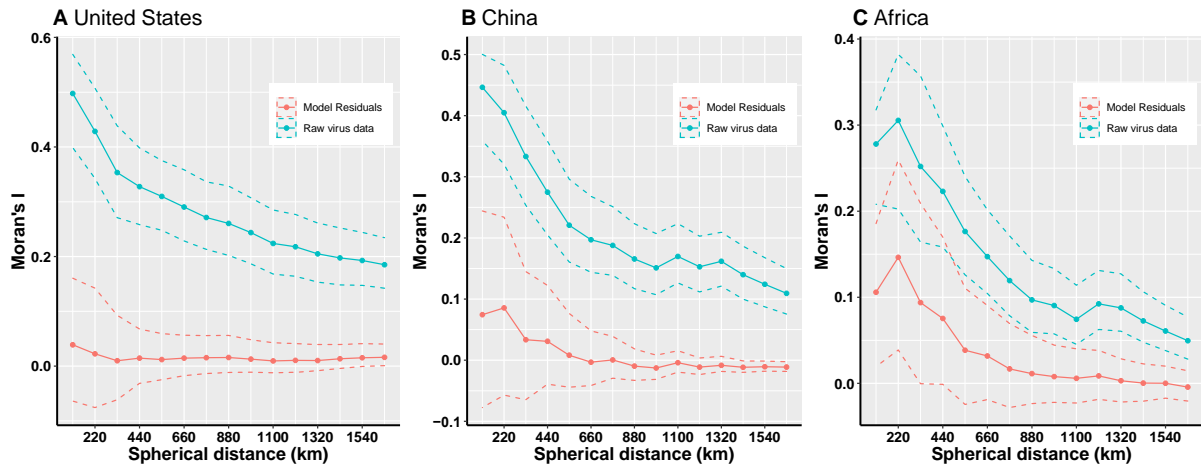

35  
36 **Figure 5S Moran's I across different spherical distances.** A, United States; B, China; C, Africa. The solid  
37 line and dots represented the median Moran's I value, and the grey area represented its 95% quantiles generated  
38 from 1000 samples (Blue: Raw virus data) or replicate BRT models (Red: Model residuals). We used the fixed  
39 spherical distance as the neighbourhood weights—as there is no general consensus for selecting cut-off values,  
40 we chose spherical distances ranging from one time to fifteen times of distance of 1° grid cell at the equator, i.e.  
41 110km to 1650km, considering the area of three regions. Our BRT models reduced Moran's I value from a  
42 range of 0.19–0.50 for the raw virus data to 0.009–0.04 for the model residuals in the United States A), 0.11–  
43 0.45 to -0.01–0.09 in China B), 0.05–0.31 to -0.004–0.15 in Africa C), suggesting that BRT models with 33  
44 predictors have adequately accounted for spatial autocorrelations in the raw virus data in all three regions.

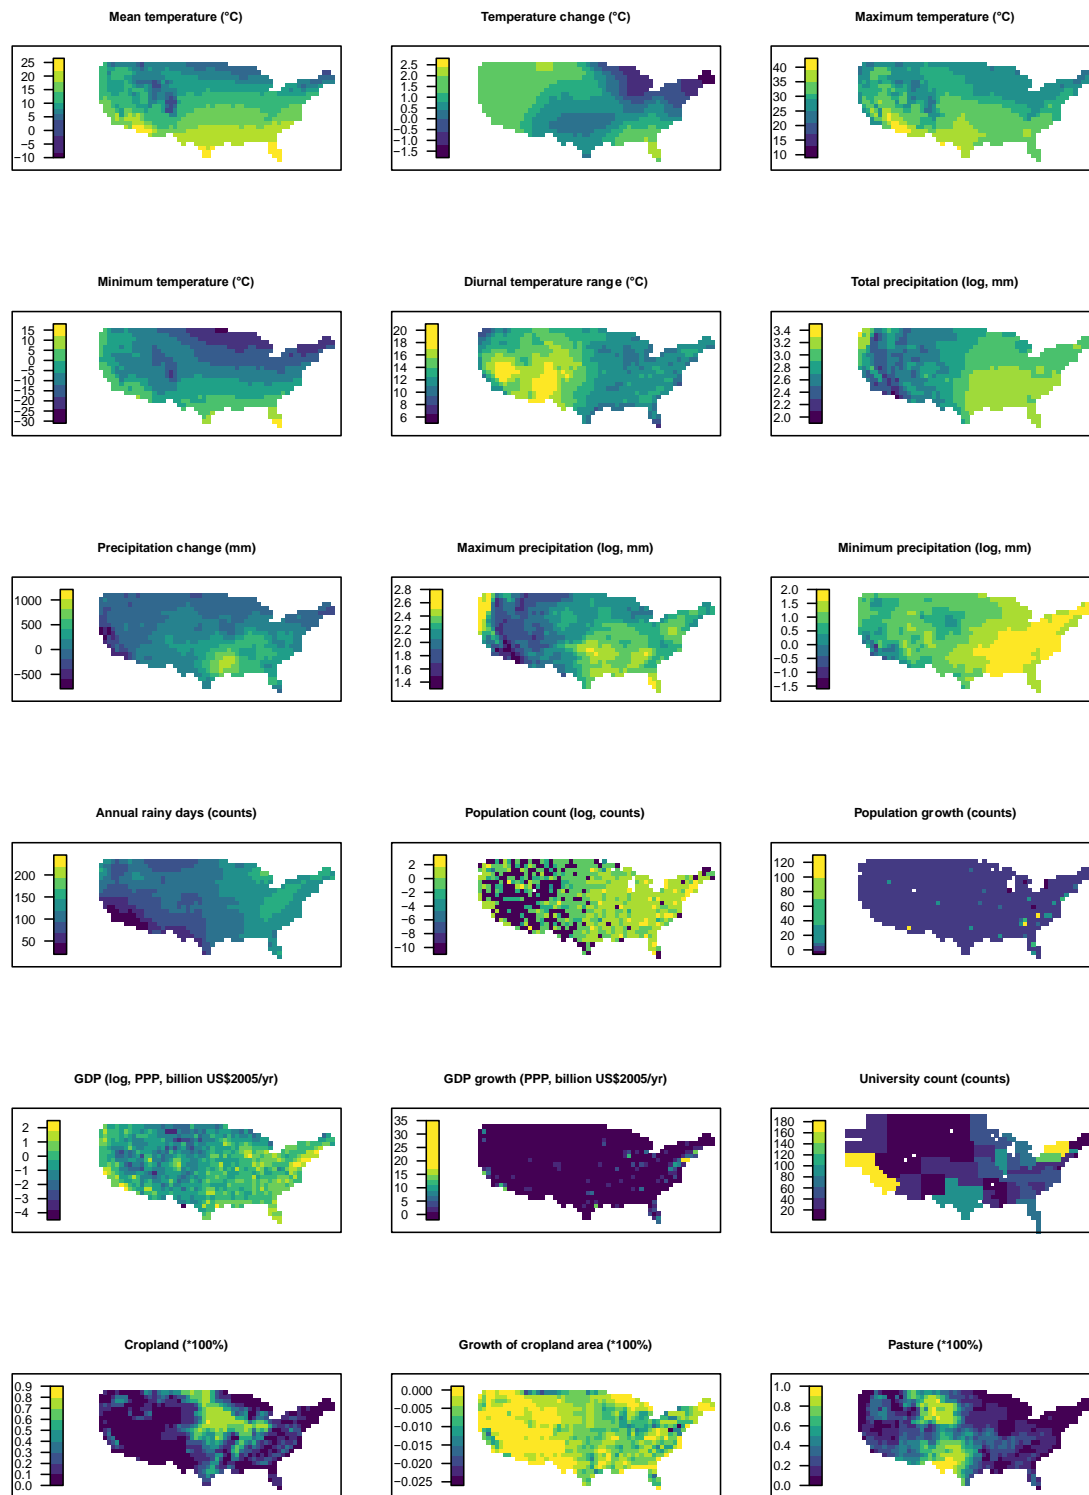

45  
46 **Figure 6S Distribution maps for 32 predictors in 2015 in the United States.** The values of these explanatory  
47 variables and latitude in each grid cell were used to predict the virus discovery in the corresponding grid cell in  
48 the United States in 2010–2019. Explanatory variables were log transformed where necessary to get better  
49 visualization, not meaning they entered the model by logged values.

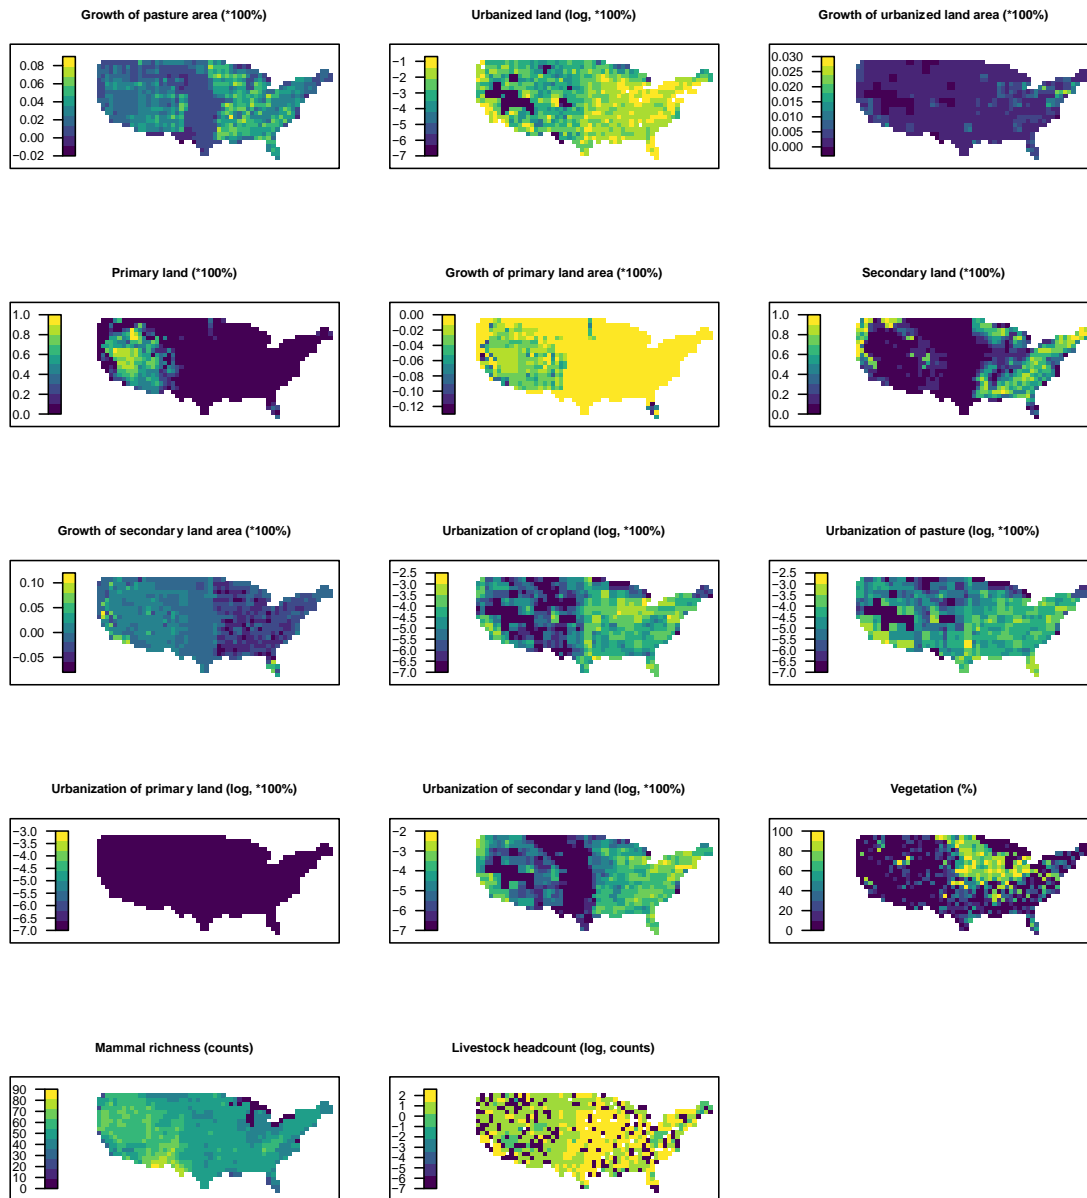

50  
51 **Figure 6S Continued**

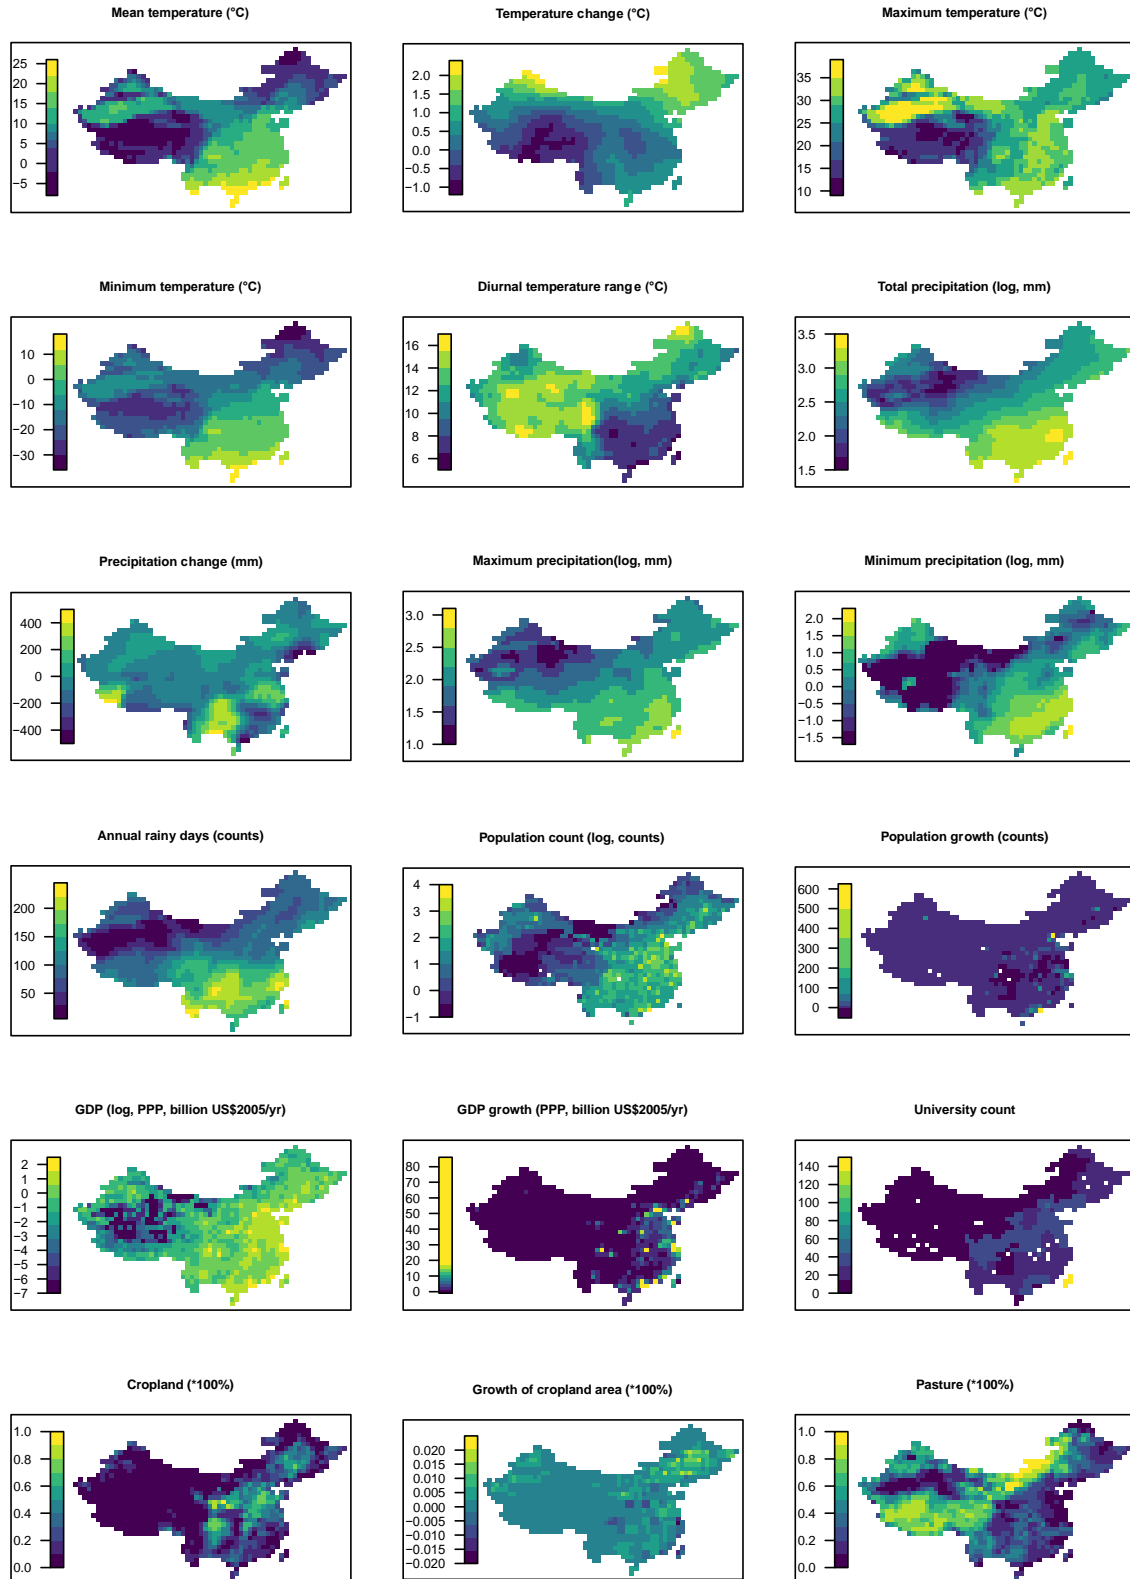

52  
53  
54  
55  
56

**Figure 7S Distribution maps for 32 predictors in 2015 in China.** The values of these explanatory variables and latitude in each grid cell were used to predict the virus discovery in the corresponding grid cell in China in 2010–2019. Explanatory variables were log transformed where necessary to get better visualization, not meaning they entered the model by logged values.

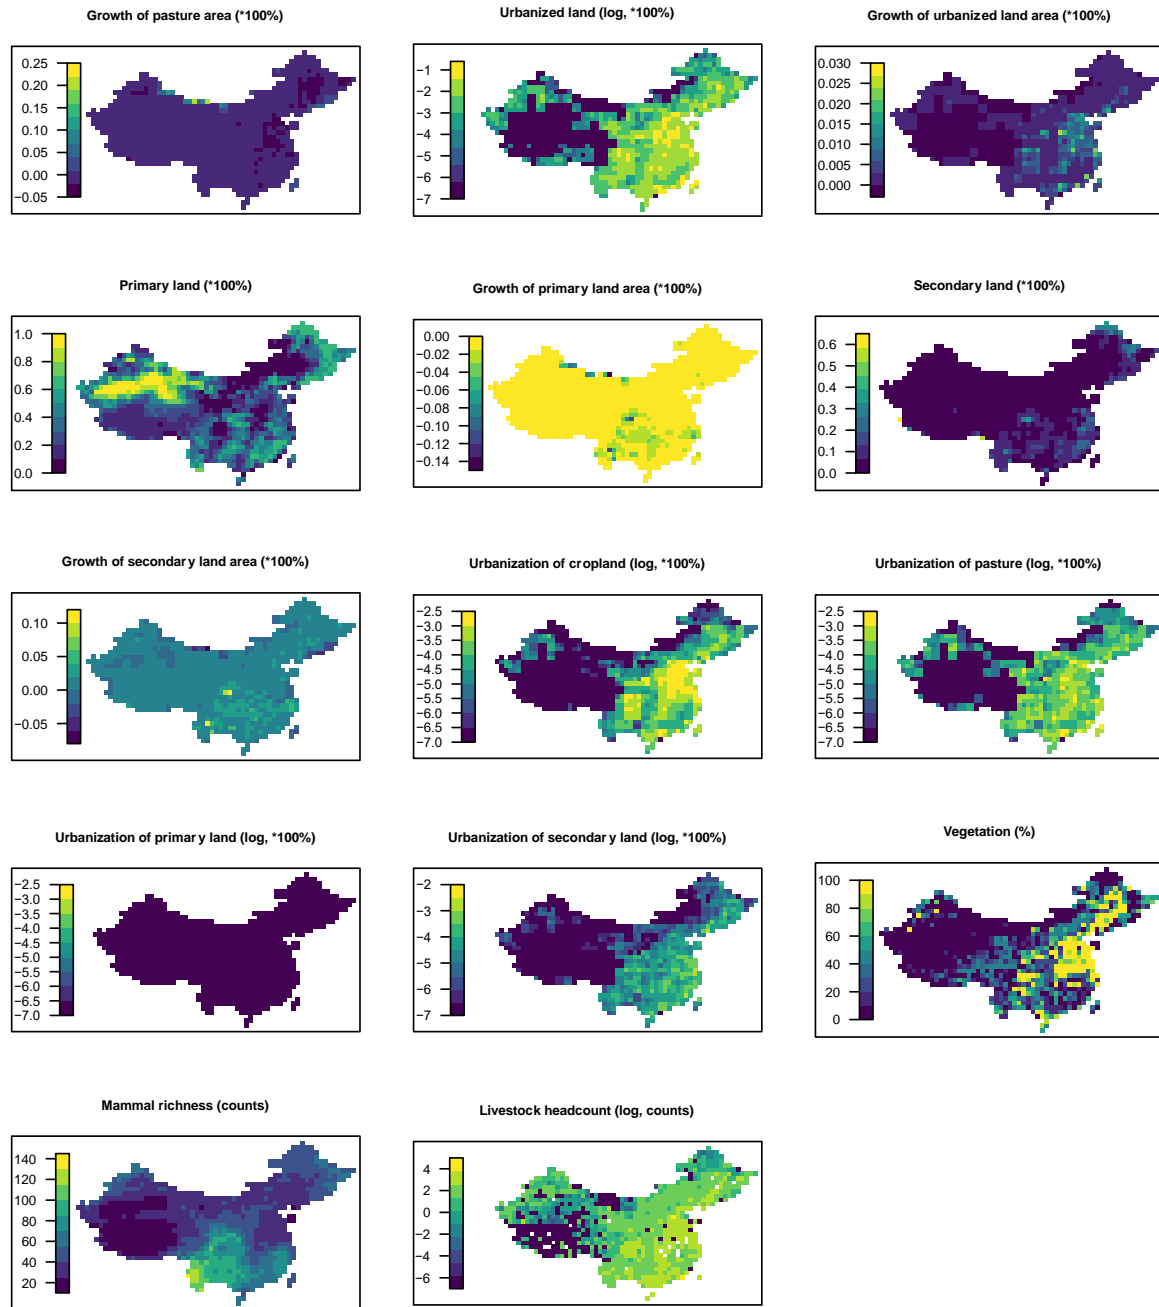

57  
58 **Figure 7S Continued**

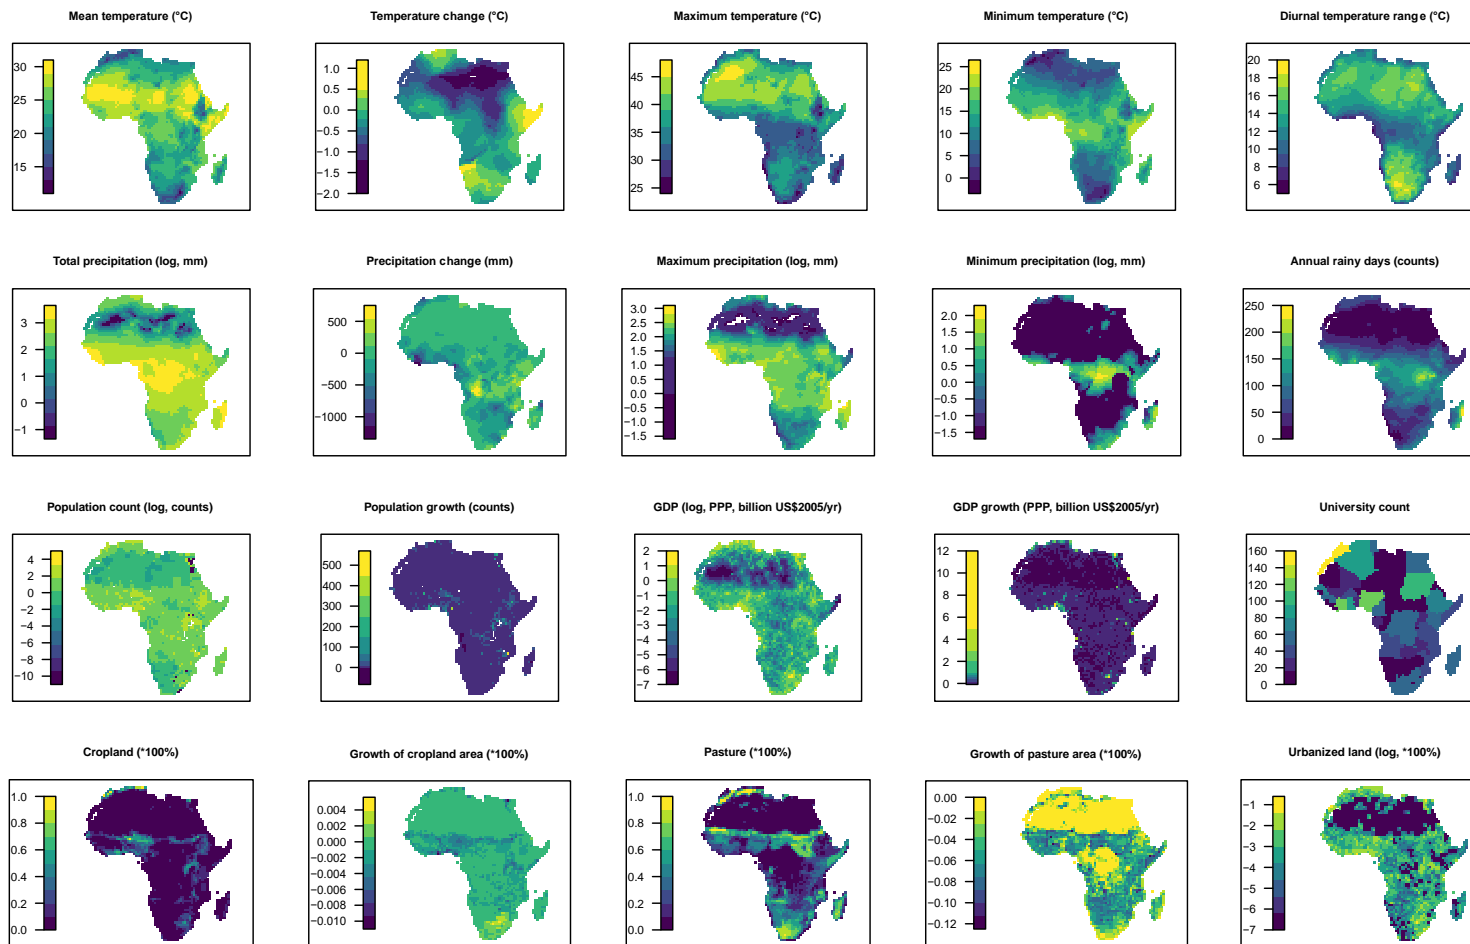

59  
60  
61  
62

**Figure 8S Distribution maps for 32 predictors in 2015 in Africa.** The values of these explanatory variables and latitude in each grid cell were used to predict the virus discovery in the corresponding grid cell in Africa in 2010–2019. Explanatory variables were log transformed where necessary to get better visualization, not meaning they entered the model by logged values.

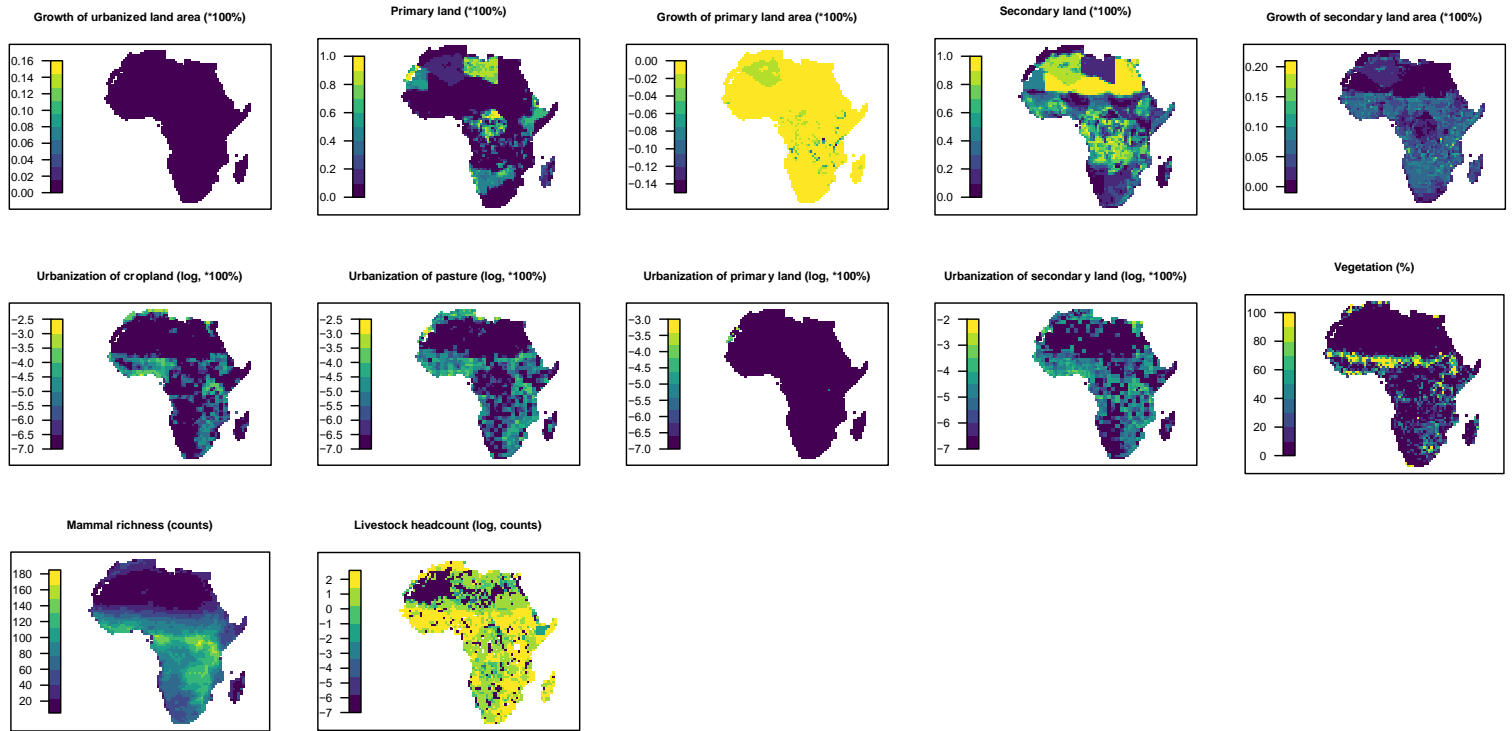

63  
64 **Figure 8S Continued**

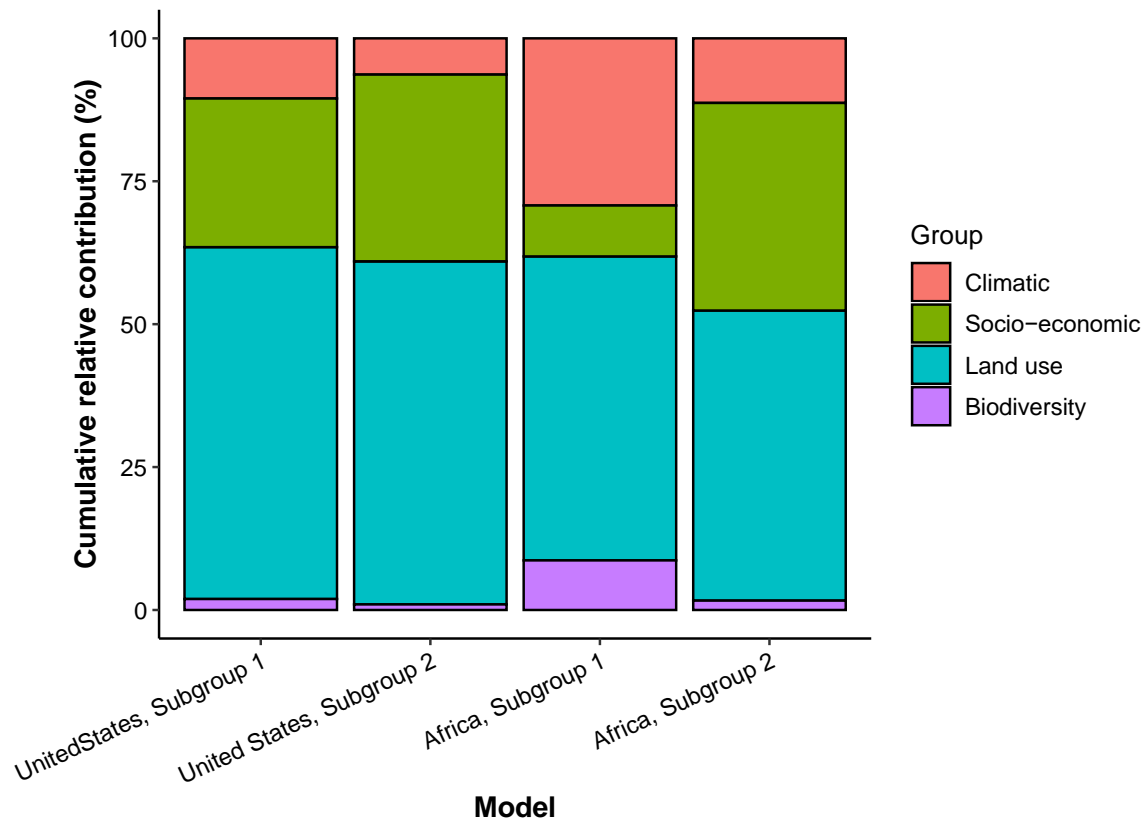

65  
66 **Figure 9S Cumulative relative contribution of predictors to human-infective RNA virus discovery by**  
67 **group in each model of subgroups.** Subgroup 1 represents viruses firstly discovered from the region (United  
68 States or Africa); Subgroup 2 represents viruses firstly discovered elsewhere in the world. The relative  
69 contributions of all explanatory factors sum to 100% in each model, and each colour represents the cumulative  
70 relative contribution of all explanatory factors within each group.



## 71 References

- 72 1. Barry M, Russi M, Armstrong L, et al. Brief report: treatment of a laboratory-acquired Sabia virus  
73 infection. *The New England journal of medicine* 1995; **333**(5): 294-6.
- 74 2. Buchmeier M, Adam E, Rawls WE. Serological evidence of infection by Pichinde virus among  
75 laboratory workers. *Infection and immunity* 1974; **9**(5): 821-3.
- 76 3. Buckley SM, Casals J. Lassa fever, a new virus disease of man from West Africa. 3. Isolation and  
77 characterization of the virus. *Am J Trop Med Hyg* 1970; **19**(4): 680-91.
- 78 4. Briese T, Paweska JT, McMullan LK, et al. Genetic detection and characterization of Lujo virus, a new  
79 hemorrhagic fever-associated arenavirus from southern Africa. *PLoS Pathog* 2009; **5**(5): e1000455.
- 80 5. Armstrong C, Lillie RD. Experimental Lymphocytic Choriomeningitis of Monkeys and Mice Produced  
81 by a Virus Encountered in Studies of the 1933 St. Louis Encephalitis Epidemic. *Public Health Reports (1896-*  
82 *1970)* 1934; **49**(35): 1019-27.
- 83 6. Georges AJ, Gonzalez JP, Abdul-Wahid S, Saluzzo JF, Meunier DM, McCormick JB. Antibodies to  
84 Lassa and Lassa-like viruses in man and mammals in the Central African Republic. *Transactions of the Royal*  
85 *Society of Tropical Medicine and Hygiene* 1985; **79**(1): 78-9.
- 86 7. Enserink M. Emerging diseases. New arenavirus blamed for recent deaths in California. *Science* 2000;  
87 **289**(5481): 842-3.
- 88 8. Oshiro LS, Haley CE, Roberto RR, et al. A 27-nm virus isolated during an outbreak of acute infectious  
89 nonbacterial gastroenteritis in a convalescent hospital: a possible new serotype. *Journal of Infectious Diseases*  
90 1981; **143**(6): 791-5.
- 91 9. Xu AY, Pang QF, Qiu FX. Detection of astrovirus in faeces of infants with gastroenteritis in autumn  
92 [Article in Chinese]. *Journal of Medical Research* 1981; (06): 32.
- 93 10. Dowling JM, Wynne H. Role of Enteric Adenoviruses and Rotaviruses in Infantile Gastroenteritis.  
94 *Lancet* 1981; **2**(8241): 305-6.
- 95 11. Finkbeiner SR, Le BM, Holtz LR, Storch GA, Wang D. Detection of Newly Described Astrovirus  
96 MLB1 in Stool Samples from Children. *Emerging Infectious Diseases* 2009; **15**(3): 441-4.
- 97 12. Chu DK, Chin AW, Smith GJ, et al. Detection of novel astroviruses in urban brown rats and previously  
98 known astroviruses in humans. *The Journal of general virology* 2010; **91**(Pt 10): 2457-62.
- 99 13. Kapoor A, Li L, Victoria J, et al. Multiple novel astrovirus species in human stool. *Journal of General*  
100 *Virology* 2009; **90**: 2965-72.
- 101 14. Finkbeiner SR, Holtz LR, Jiang Y, et al. Human stool contains a previously unrecognized diversity of  
102 novel astroviruses. *Virology journal* 2009; **6**: 161.
- 103 15. Wang Y, Li Y, Jin Y, Li DD, Li X, Duan ZJ. Recently identified novel human astroviruses in children  
104 with diarrhea, China. *Emerg Infect Dis* 2013; **19**(8): 1333-5.
- 105 16. Finkbeiner SR, Li Y, Ruone S, et al. Identification of a novel astrovirus (astrovirus VA1) associated  
106 with an outbreak of acute gastroenteritis. *Journal of virology* 2009; **83**(20): 10836-9.
- 107 17. Tao Z, Wang H, Zhang W, Xu A. Novel astrovirus types circulating in Shandong Province (Eastern  
108 China) during 2016: A clinical and environmental surveillance. *J Clin Virol* 2019; **116**: 69-73.
- 109 18. Rott R, Herzog S, Fleischer B, et al. Detection of serum antibodies to Borna disease virus in patients  
110 with psychiatric disorders. *Science* 1985; **228**(4700): 755-6.
- 111 19. Chen CH, Chiu YL, Wei FC, et al. High seroprevalence of Borna virus infection in schizophrenic  
112 patients, family members and mental health workers in Taiwan. *Molecular psychiatry* 1999; **4**(1): 33-8.
- 113 20. Bode L, Riegel S, Lange W, Ludwig H. Human infections with Borna disease virus: Seroprevalence in  
114 patients with chronic diseases and healthy individuals. *Journal of medical virology* 1992; **36**(4): 309-15.
- 115 21. Kapikian AZ, Wyatt RG, Dolin R, Thornhill TS, Kalica AR, Chanock RM. Visualization by immune  
116 electron microscopy of a 27-nm particle associated with acute infectious nonbacterial gastroenteritis. *Journal of*  
117 *virology* 1972; **10**(5): 1075-81.
- 118 22. Fang ZY, Wen LY, Jin SJ, Zhao ZH. Norwalk-like virus infection found in diarrhea patients in China  
119 [Article in Chinese]. *Chinese Journal of Virology* 1995; **11**(03): 215-9.
- 120 23. Taylor MB, Schildhauer CI, Parker S, et al. Two successive outbreaks of SRSV-associated  
121 gastroenteritis in South Africa. *Journal of medical virology* 1993; **41**(1): 18-23.
- 122 24. Nakata S, Estes MK, Chiba S. Detection of Human Calicivirus Antigen and Antibody by Enzyme-  
123 Linked Immunosorbent Assays. *J Clin Microbiol* 1988; **26**(10): 2001-5.
- 124 25. Wolfaardt M, Taylor MB, Booysen HF, Engelbrecht L, Grabow WO, Jiang X. Incidence of human  
125 calicivirus and rotavirus infection in patients with gastroenteritis in South Africa. *Journal of medical virology*  
126 1997; **51**(4): 290-6.
- 127 26. Smith AW, Berry ES, Skilling DE, et al. In vitro isolation and characterization of a calicivirus causing  
128 a vesicular disease of the hands and feet. *Clinical infectious diseases : an official publication of the Infectious*  
129 *Diseases Society of America* 1998; **26**(2): 434-9.

- 130 27. Hamre D, Procknow JJ. A new virus isolated from the human respiratory tract. *Proceedings of the*  
131 *Society for Experimental Biology and Medicine Society for Experimental Biology and Medicine* 1966; **121**(1):  
132 190-3.
- 133 28. Virus Research Group of Kun Number 323 Unit TCPsLA. Isolation, identification and serological  
134 studies of a coronavirus strain [Article in Chinese]. *Acta Microbiologica Sinica* 1975; **15**(03): 231-5+62.
- 135 29. Hays JP, Myint SH. PCR sequencing of the spike genes of geographically and chronologically distinct  
136 human coronaviruses 229E. *J Virol Methods* 1998; **75**(2): 179-93.
- 137 30. Esper F, Weibel C, Ferguson D, Landry ML, Kahn JS. Evidence of a novel human coronavirus that is  
138 associated with respiratory tract disease in infants and young children. *J Infect Dis* 2005; **191**(4): 492-8.
- 139 31. Chan KH, Cheng VC, Woo PC, et al. Serological responses in patients with severe acute respiratory  
140 syndrome coronavirus infection and cross-reactivity with human coronaviruses 229E, OC43, and NL63. *Clinical*  
141 *and diagnostic laboratory immunology* 2005; **12**(11): 1317-21.
- 142 32. Smuts H, Workman L, Zar HJ. Role of human metapneumovirus, human coronavirus NL63 and human  
143 bocavirus in infants and young children with acute wheezing. *Journal of medical virology* 2008; **80**(5): 906-12.
- 144 33. McIntosh K, Dees JH, Becker WB, Kapikian AZ, Chanock RM. Recovery in tracheal organ cultures of  
145 novel viruses from patients with respiratory disease. *Proc Natl Acad Sci U S A* 1967; **57**(4): 933-40.
- 146 34. Venter M, Lassauniere R, Kresfelder TL, Westerberg Y, Visser A. Contribution of Common and  
147 Recently Described Respiratory Viruses to Annual Hospitalizations in Children in South Africa. *Journal of*  
148 *medical virology* 2011; **83**(8): 1458-68.
- 149 35. Esper F, Weibel C, Ferguson D, Landry ML, Kahn JS. Coronavirus HKU1 infection in the United  
150 States. *Emerging Infectious Diseases* 2006; **12**(5): 775-9.
- 151 36. Woo PC, Lau SK, Chu CM, et al. Characterization and complete genome sequence of a novel  
152 coronavirus, coronavirus HKU1, from patients with pneumonia. *Journal of virology* 2005; **79**(2): 884-95.
- 153 37. Bialek SR, Allen D, Alvarado-Ramy F, et al. First Confirmed Cases of Middle East Respiratory  
154 Syndrome Coronavirus (MERS-CoV) Infection in the United States, Updated Information on the Epidemiology  
155 of MERS-CoV Infection, and Guidance for the Public, Clinicians, and Public Health Authorities - May 2014.  
156 *Mmwr-Morbid Mortal W* 2014; **63**(19): 431-6.
- 157 38. Gao J, Song P. China upgrades surveillance and control measures of Middle East respiratory syndrome  
158 (MERS). *Bioscience trends* 2015; **9**(3): 203-4.
- 159 39. Abroug F, Slim A, Ouanes-Besbes L, et al. Family Cluster of Middle East Respiratory Syndrome  
160 Coronavirus Infections, Tunisia, 2013. *Emerging infectious diseases* 2014; **20**(9): 1527-30.
- 161 40. Charles M, Cdc. Severe acute respiratory syndrome (SARS) and coronavirus testing - United States,  
162 2003 (Reprinted from MMWR, vol 52, pg 297-302, 2003). *Jama-J Am Med Assoc* 2003; **289**(17): 2203-6.
- 163 41. Peiris JS, Lai ST, Poon LL, et al. Coronavirus as a possible cause of severe acute respiratory syndrome.  
164 *Lancet* 2003; **361**(9366): 1319-25.
- 165 42. Chiu W-T, Huang J-S, Ho Y-S. Bibliometric analysis of Severe Acute Respiratory Syndrome-related  
166 research in the beginning stage. *Scientometrics* 2004; **61**(1): 69-77.
- 167 43. Miranda ME, White ME, Dayrit MM, Hayes CG, Ksiazek TG, Burans JP. Seroepidemiological study  
168 of filovirus related to Ebola in the Philippines. *Lancet* 1991; **337**(8738): 425-6.
- 169 44. Bowen ET, Lloyd G, Harris WJ, Platt GS, Baskerville A, Vella EE. Viral haemorrhagic fever in  
170 southern Sudan and northern Zaire. Preliminary studies on the aetiological agent. *Lancet* 1977; **1**(8011): 571-3.
- 171 45. Le Guenno B, Formenty P, Wyers M, Gounon P, Walker F, Boesch C. Isolation and partial  
172 characterisation of a new strain of Ebola virus. *Lancet* 1995; **345**(8960): 1271-4.
- 173 46. Johnson KM, Lange JV, Webb PA, Murphy FA. Isolation and partial characterisation of a new virus  
174 causing acute haemorrhagic fever in Zaire. *Lancet* 1977; **1**(8011): 569-71.
- 175 47. CDC. Imported case of Marburg hemorrhagic fever - Colorado, 2008. *MMWR Morb Mortal Wkly Rep*  
176 2009; **58**(49): 1377-81.
- 177 48. Gear JS, Cassel GA, Gear AJ, et al. Outbreak of Marburg virus disease in Johannesburg. *British*  
178 *medical journal* 1975; **4**(5995): 489-93.
- 179 49. Smithburn KC, Paterson HE, Heymann CS, Winter PA. An agent related to Uganda S virus from man  
180 and mosquitoes in South Africa. *South African medical journal = Suid-Afrikaanse tydskrif vir geneeskunde*  
181 1959; **33**: 959-62.
- 182 50. Lavinder CH, Francis E. The Etiology of Dengue. An Attempt to Produce the Disease in the Rhesus  
183 Monkey by the Inoculation of Defibrinated Blood. *The Journal of Infectious Diseases* 1914; **15**(2): 341-6.
- 184 51. Clarke EJ, Jr., Sutor EC, Jr., Jenkin HM. A serologic survey for arbovirus antibodies in inhabitants of  
185 a southwest Taiwan village. *Tropical and geographical medicine* 1967; **19**(4): 326-32.
- 186 52. Edington AD. "Dengue " as seen in the Recent Epidemic in Durban. *J Med Assoc S Africa* 1927; **1**(17):  
187 446-8.
- 188 53. Pina FP, Merikangas UR. Japanese B-Encephalitis in an American Soldier Returning from Korea. *New*  
189 *England Journal of Medicine* 1953; **249**(13): 531-2.

- 190 54. Yen CH. Isolation of a Virus from an Acute Encephalitis Case in Peiping. *Proceedings of the Society*  
191 *for Experimental Biology and Medicine* 1941; **46**(4): 609-11.
- 192 55. Simon-Loriere E, Sall AA. Autochthonous Japanese Encephalitis with Yellow Fever Coinfection in  
193 Africa. *New England Journal of Medicine* 2017; **376**(15): 1483-5.
- 194 56. Wang J, Zhang H, Fu S, et al. Isolation of kysanur forest disease virus from febrile patient, yunnan,  
195 china. *Emerg Infect Dis* 2009; **15**(2): 326-8.
- 196 57. Andayi F, Charrel RN, Kieffer A, et al. A Sero-epidemiological Study of Arboviral Fevers in Djibouti,  
197 Horn of Africa. *PLoS neglected tropical diseases* 2014; **8**(12).
- 198 58. Rivers TM, Schwentker FF. Louping Ill in Man. *The Journal of experimental medicine* 1934; **59**(5):  
199 669-85.
- 200 59. Smithburn KC. Neutralizing antibodies against certain recently isolated viruses in the sera of human  
201 beings residing in East Africa. *Journal of immunology* 1952; **69**(2): 223-34.
- 202 60. Goldfield M, Austin SM, Black HC, Taylor BF, Altman R. A non-fatal human case of Powassan virus  
203 encephalitis. *Am J Trop Med Hyg* 1973; **22**(1): 78-81.
- 204 61. Sulkin SE, Burns KF, Shelton DF, Wallis C. Bat salivary gland virus: infections of man and monkey.  
205 *Texas reports on biology and medicine* 1962; **20**: 113-27.
- 206 62. Webster LT, Fite GL. A Virus Encountered in the Study of Material from Cases of Encephalitis N the  
207 St. Louis and Kansas City Epidemics of 1933. *Science* 1933; **78**(2029): 463-5.
- 208 63. Tang Y, Gao X, Diao Y, et al. Tembusu virus in human, China. *Transboundary and emerging diseases*  
209 2013; **60**(3): 193-6.
- 210 64. Cruse RP, Rothner AD, Erenberg G, Calisher CH. Central European tick-borne encephalitis: an Ohio  
211 case with a history of foreign travel. *American journal of diseases of children (1960)* 1979; **133**(10): 1070-1.
- 212 65. Wang WS, Zhao CL. Isolation and identification of forest encephalitis virus [Article in Chinese].  
213 *Journal of Harbin Medical University* 1956; (02): 44-9.
- 214 66. Dick GW, Haddow AJ. Uganda S virus; a hitherto unrecorded virus isolated from mosquitoes in  
215 Uganda. I. Isolation and pathogenicity. *Transactions of the Royal Society of Tropical Medicine and Hygiene*  
216 1952; **46**(6): 600-18.
- 217 67. Smithburn KC, Kokernot RH, Weinbren MP, De Meillon B. Studies on arthropod-borne viruses of  
218 Tongaland. IX. Isolation of Wesselsbron virus from a naturally infected human being and from *Aedes*  
219 (*Banksinella*) *circumluteolus* Theo. *The South African journal of medical sciences* 1957; **22**(2-3): 113-20.
- 220 68. Nash D, Mostashari F, Fine A, et al. The outbreak of West Nile virus infection in the New York City  
221 area in 1999. *New Engl J Med* 2001; **344**(24): 1807-14.
- 222 69. Li XL, Fu SH, Liu WB, et al. West nile virus infection in Xinjiang, China. *Vector Borne Zoonotic Dis*  
223 2013; **13**(2): 131-3.
- 224 70. Smithburn KC, Hughes TP, Burke AW, Paul JH. A Neurotropic Virus Isolated from the Blood of a  
225 Native of Uganda. *The American Journal of Tropical Medicine and Hygiene* 1940 **s1-20**(4): 471 - 92.
- 226 71. GUITERAS GM. THE YELLOW FEVER EPIDEMIC OF 1903 AT LAREDO, TEXAS. *Jama* 1904;  
227 **XLIII**(2): 115-21.
- 228 72. Chen J, Lu H. Yellow fever in China is still an imported disease. *Bioscience trends* 2016; **10**(2): 158-62.
- 229 73. Stokes A, Bauer JH, Hudson NP. THE TRANSMISSION OF YELLOW FEVER TO MACACUS  
230 RHESUS: PRELIMINARY NOTE. *Journal of the American Medical Association* 1928; **90**(4): 253-4.
- 231 74. Foy BD, Kobylinski KC, Chilson Foy JL, et al. Probable non-vector-borne transmission of Zika virus,  
232 Colorado, USA. *Emerg Infect Dis* 2011; **17**(5): 880-2.
- 233 75. Sun H, Jia FJ, Huang BC. Research progress and epidemic situation of the Zika Virus [Article in  
234 Chinese]. *Chin J Diagnostics (Electronic Edition)* 2016; **04**(01): 66-9.
- 235 76. Dick GW. Zika virus. II. Pathogenicity and physical properties. *Transactions of the Royal Society of*  
236 *Tropical Medicine and Hygiene* 1952; **46**(5): 521-34.
- 237 77. Choo QL, Kuo G, Weiner AJ, Overby LR, Bradley DW, Houghton M. Isolation of a cDNA clone  
238 derived from a blood-borne non-A, non-B viral hepatitis genome. *Science* 1989; **244**(4902): 359-62.
- 239 78. Xu Z, Shen FM, Xu ZY, Huang QS. HCV infection and primary liver cell cancer [Article in Chinese].  
240 *Tumor (Shanghai)* 1990; **10**(03): 115-05.
- 241 79. Kew MC, Houghton M, Choo QL, Kuo G. Hepatitis C virus antibodies in southern African blacks with  
242 hepatocellular carcinoma. *Lancet* 1990; **335**(8694): 873-4.
- 243 80. Simons JN, Leary TP, Dawson GJ, et al. Isolation of Novel Virus-Like Sequences Associated with  
244 Human Hepatitis. *Nat Med* 1995; **1**(6): 564-9.
- 245 81. Wang Y, Okamoto H, An P, Chen HS, Liu YL, Wang FS. Infection of hepatitis G virus among blood  
246 donors in China [Article in Chinese]. *Journal of Beijing Medical University* 1996; **28**(02): 97.
- 247 82. Kapoor A, Kumar A, Simmonds P, et al. Virome Analysis of Transfusion Recipients Reveals a Novel  
248 Human Virus That Shares Genomic Features with Hepaciviruses and Pegiviruses. *mBio* 2015; **6**(5): e01466-15.

- 249 83. Wang H, Wan Z, Xu R, et al. A Novel Human Pegivirus, HPgV-2 (HHpgV-1), Is Tightly Associated  
250 With Hepatitis C Virus (HCV) Infection and HCV/Human Immunodeficiency Virus Type 1 Coinfection.  
251 *Clinical infectious diseases : an official publication of the Infectious Diseases Society of America* 2018; **66**(1):  
252 29-35.
- 253 84. Rodgers MA, Holzmayer V, Vallari A, et al. Hepatitis C virus surveillance and identification of human  
254 pegivirus 2 in a large Cameroonian cohort. *Journal of viral hepatitis* 2019; **26**(1): 30-7.
- 255 85. Yolken R, Dubovi E, Leister F, Reid R, Almeida J, Santosham M. Infantile Gastroenteritis  
256 Associated with Excretion of Pestivirus Antigens. *Lancet* 1989; **1**(8637): 517-20.
- 257 86. Giangaspero M, Wellemans G, Vanopdenbosch E, Belloli A, Verhulst A. Bovine viral diarrhoea.  
258 *Lancet* 1988; **2**(8602): 110.
- 259 87. Morzunov SP, Feldmann H, Spiropoulou CF, et al. A newly recognized virus associated with a fatal  
260 case of hantavirus pulmonary syndrome in Louisiana. *Journal of virology* 1995; **69**(3): 1980-3.
- 261 88. Ravkov EV, Rollin PE, Ksiazek TG, Peters CJ, Nichol ST. Genetic and serologic analysis of Black  
262 Creek Canal virus and its association with human disease and *Sigmodon hispidus* infection. *Virology* 1995;  
263 **210**(2): 482-9.
- 264 89. Lee PW, Gajdusek DC, Gibbs CJ, Xu ZY. Aetiological relation between Korean haemorrhagic fever  
265 with renal syndrome in People's Republic of China. *Lancet* 1980; **1**(8172): 819-20.
- 266 90. Klempa B, Koivogui L, Sylla O, et al. Serological evidence of human hantavirus infections in Guinea,  
267 West Africa. *J Infect Dis* 2010; **201**(7): 1031-4.
- 268 91. Forthal DN, Bauer SP, McCormick JB. Antibody to hemorrhagic fever with renal syndrome viruses  
269 (Hantaviruses) in the United States. *American journal of epidemiology* 1987; **126**(6): 1210-3.
- 270 92. Song G, Qiu XZ, Ni DS, Zhao JN, Kong BX. Etiological studies of epidemic hemorrhagic fever. I.  
271 Virus isolation in *Apodemus agrarius* from non-endemic area and its antigenic characterization [Article in  
272 Chinese]. *Zhongguo yi xue ke xue yuan xue bao Acta Academiae Medicinae Sinicae* 1982; **4**(2): 73-7.
- 273 93. Tomori O, Morikawa S, Matsuura Y, Kitamura T. Antibody to Japanese strain of hemorrhagic fever  
274 with renal syndrome (HFRS) virus in Nigerian sera. *Transactions of the Royal Society of Tropical Medicine and*  
275 *Hygiene* 1986; **80**(6): 1008-9.
- 276 94. Nichol ST, Spiropoulou CF, Morzunov S, et al. Genetic identification of a hantavirus associated with  
277 an outbreak of acute respiratory illness. *Science* 1993; **262**(5135): 914-7.
- 278 95. Decock KM, Bradley DW, Sandford NL, Govindarajan S, Maynard JE, Redeker AG. Epidemic Non-a,  
279 Non-B Hepatitis in Patients from Pakistan. *Ann Intern Med* 1987; **106**(2): 227-30.
- 280 96. Huang RT, Wei J, Tian X, Li DR, Yin SR. Isolation of a small RNA virus from feces of a patient with  
281 enterically transmitted Non-A Non-B hepatitis in China [Article in Chinese]. *Journal of Academy of Military*  
282 *Medical Sciences* 1989; **13**(04): 273-7.
- 283 97. Belabbes EH, Bouguermouh A, Benatallah A, Illoul G. Epidemic Non-a, Non-B Viral-Hepatitis in  
284 Algeria - Strong Evidence for Its Spreading by Water. *Journal of medical virology* 1985; **16**(3): 257-63.
- 285 98. Sridhar S, Yip CCY, Wu S, et al. Rat Hepatitis E Virus as Cause of Persistent Hepatitis after Liver  
286 Transplant. *Emerg Infect Dis* 2018; **24**(12): 2241-50.
- 287 99. Yen YC, Kong LX, Lee L, et al. Characteristics of Crimean-Congo hemorrhagic fever virus (Xinjiang  
288 strain) in China. *Am J Trop Med Hyg* 1985; **34**(6): 1179-82.
- 289 100. Simpson DI, Knight EM, Courtois G, Williams MC, Weinbren MP, Kibukamusoke JW. Congo virus: a  
290 hitherto undescribed virus occurring in Africa. I. Human isolations--clinical notes. *East African medical journal*  
291 1967; **44**(2): 86-92.
- 292 101. Causey OR, Kemp GE, Madbouly MH, Lee VH. Arbovirus surveillance in Nigeria, 1964-1967.  
293 *Bulletin de la Societe de pathologie exotique et de ses filiales* 1969; **62**(2): 249-53.
- 294 102. Morrill JC, Johnson BK, Hyams C, et al. Serological evidence of arboviral infections among humans of  
295 coastal Kenya. *The Journal of tropical medicine and hygiene* 1991; **94**(3): 166-8.
- 296 103. Francis T, Magill TP. IMMUNOLOGICAL STUDIES WITH THE VIRUS OF INFLUENZA. *The*  
297 *Journal of experimental medicine* 1935; **62**(4): 505-16.
- 298 104. Chang HT, Chiang YT. Studies on an epidemic of influenza in Peking. *Chin Med J* 1950; **68**(7-8): 185-  
299 92.
- 300 105. Isaacs A, Andrewes CH. The Spread of Influenza. Evidence from, 1950-1951. *British medical journal*  
301 1951: 921-7.
- 302 106. Thomas Francis J. Differentiation of Influenza A and Influenza B by the Complement-Fixation  
303 Reaction. *Proceedings of the Society for Experimental Biology and Medicine* 1940; **45**(3): 861-3.
- 304 107. Wen C-Cü, Chu C-M. Survey of Influenza Antibodies in Normal Human Sera in Peking. *Chinese*  
305 *Medical Journal* 1957; **75**(10): 792-801.
- 306 108. Montefiore D, Drozdov SG, Kafuko GW, Fayinka OA, Soneji A. Influenza in East Africa, 1969-70.  
307 *Bulletin of the World Health Organization* 1970; **43**(2): 269-73.

- 308 109. Francis T, Jr., Quilligan JJ, Jr., Minuse E. Identification of another epidemic respiratory disease.  
309 *Science* 1950; **112**(2913): 495-7.
- 310 110. Zhang Q. Process of isolating influenza virus in 1956 [Article in Chinese]. *Biological Products*  
311 *Newsletter* 1957; **2**(1): 80.
- 312 111. Joosting AC, Head B, Bynoe ML, Tyrrell DA. Production of common colds in human volunteers by  
313 influenza C virus. *British medical journal* 1968; **4**(5624): 153-4.
- 314 112. Burnet FM. Human infection with the virus of Newcastle disease of fowls. *The Medical Journal of*  
315 *Australia* 1943; **30**(6): 313-4.
- 316 113. Karzon DT. Studies on a neutralizing antibody against canine distemper virus found in man. *Pediatrics*  
317 1955; **16**(6): 809-18.
- 318 114. Goldberger J, Anderson JF. The nature of the virus of measles. *Journal of the American Medical*  
319 *Association* 1911; **LVI**(12): 971-2.
- 320 115. Tang FF, Wu SY, Huang YT, Wen ZQ. Research on the isolation of measles virus [Article in Chinese].  
321 *Chinese Science Bulletin* 1958; (10): 314-5.
- 322 116. Baylet R, Schlupe R, Cantrelle DS, Rey M. Age-Grouping in Measles in an Urban Environment (A  
323 Serological Study). *Bulletin de la Societe Medicale d'Afrique Noire de Langue Francaise* 1963; **8**(6): 771-8.
- 324 117. Chanock RM, Parrott RH, Cook K, et al. Newly recognized myxoviruses from children with  
325 respiratory disease. *The New England journal of medicine* 1958; **258**(5): 207-13.
- 326 118. Chen ZH, Zhang EH, Zhang XZ, He NX. Isolation of parainfluenza type I virus by tissue culture and  
327 adsorption-hemagglutination test [Article in Chinese]. *Journal of Zhejiang University [Medical Sciences]* 1964;  
328 (03): 9-14+49.
- 329 119. Taylor-Robinson D, Tyrrell DA. Virus diseases on Tristan da Cunha. *Transactions of the Royal Society*  
330 *of Tropical Medicine and Hygiene* 1963; **57**: 19-22.
- 331 120. Yu JQ, Chang RX, He CJ, Guan QH, Xie JP. Serological study of 722 infants with viral pneumonia  
332 [Article in Chinese]. *Guangdong Medical Journal* 1987; **08**(04): 32-4.
- 333 121. Baker KS, Todd S, Marsh GA, et al. Novel, potentially zoonotic paramyxoviruses from the African  
334 straw-colored fruit bat *Eidolon helvum*. *Journal of virology* 2013; **87**(3): 1348-58.
- 335 122. Chanock RM. Association of a new type of cytopathogenic myxovirus with infantile croup. *The*  
336 *Journal of experimental medicine* 1956; **104**(4): 555-76.
- 337 123. Pathogen biology research group Jnmc. Virus isolation in 535 elderly patients with chronic bronchitis  
338 and other respiratory infections and antibody tests in some cases [Article in Chinese]. *Jiangsu Medical Journal*  
339 1975; (01): 47-53.
- 340 124. Balestrieri A, Russo V, D'Arrigo C. Serum haemagglutination-inhibiting antibodies for haemadsorbing  
341 viruses types 1 and 3 and croup-associated in persons in Accra, Ghana. *Arch Ital Sci Med Trop e Parassit* 1967;  
342 **48**(11/12): 299-306.
- 343 125. Johnson KM, Chanock RM, Cook MK, Huebner RJ. Studies of a new human hemadsorption virus. I.  
344 Isolation, properties and characterization. *American journal of hygiene* 1960; **71**: 81-92.
- 345 126. Lau SK, To WK, Tse PW, et al. Human parainfluenza virus 4 outbreak and the role of diagnostic tests.  
346 *Journal of clinical microbiology* 2005; **43**(9): 4515-21.
- 347 127. Niang MN, Diop OM, Sarr FD, et al. Viral etiology of respiratory infections in children under 5 years  
348 old living in tropical rural areas of Senegal: The EVIRA project. *Journal of medical virology* 2010; **82**(5): 866-  
349 72.
- 350 128. Schultz EW, Habel K. SA virus; a new member of the myxovirus group. *Journal of immunology* 1959;  
351 **82**(3): 274-8.
- 352 129. Johnson CD, Goodpasture EW. An Investigation of the Etiology of Mumps. *The Journal of*  
353 *experimental medicine* 1934; **59**(1): 1-19.
- 354 130. Wang TJ, Sun WC, Fang Z, Du SM. Etiology of Mumps in Beijing [Article in Chinese]. *National*  
355 *Medical Journal of China* 1958; **44**(01): 18-29.
- 356 131. Bayer P, Gear J. Virus meningo-encephalitis in South Africa; a study of the cases admitted to the  
357 Johannesburg Fever Hospital. *South African journal of laboratory and clinical medicine Suid-Afrikaanse*  
358 *tydskrif vir laboratorium- en kliniekwerk* 1955; **1**(1): 22-35.
- 359 132. Albarino CG, Foltzer M, Towner JS, et al. Novel paramyxovirus associated with severe acute febrile  
360 disease, South Sudan and Uganda, 2012. *Emerg Infect Dis* 2014; **20**(2): 211-6.
- 361 133. Work TH. Serological evidence of arbovirus infection in the Seminole Indians of southern Florida.  
362 *Science* 1964; **145**(3629): 270-2.
- 363 134. Smithburn KC, Haddow AJ, Mahaffy AF. A neurotropic virus isolated from *Aedes* mosquitoes caught  
364 in the Semliki forest. *Am J Trop Med Hyg* 1946; **26**: 189-208.
- 365 135. Smithburn KC, Mahaffy AF, Paul JH. Bwamba Fever and Its Causative Virus. *The American Journal*  
366 *of Tropical Medicine and Hygiene* 1941; **s1-21**(1): 75 - 90.

- 367 136. Hammon WM, Reeves WC. California encephalitis virus, a newly described agent. *California*  
368 *medicine* 1952; **77**(5): 303-9.
- 369 137. Gu HX, Spence L, Artsob H, Chia WK, Th'ng C, Lamptang V. Serological evidence of infection with  
370 California serogroup viruses (family Bunyaviridae) in residents of Long Hua, suburb of Shanghai, People's  
371 Republic of China. *Transactions of the Royal Society of Tropical Medicine and Hygiene* 1984; **78**(6): 780-1.
- 372 138. Bardos V, Sefcovicova L. The Presence of Antibodies neutralizing Tahyna Virus in the Sera of  
373 Inhabitants of some European, Asian, African and Australian Countries. *Journal of Hygiene, Epidemiology,*  
374 *Microbiology and Immunology* 1961; **5**(4): 501-4.
- 375 139. Williams MC, Woodall JP, Corbet PS. Nyando Virus: A Hitherto Undescribed Virus Isolated from  
376 Anopheles Funestus Giles Collected in Kenya. *Archiv fur die gesamte Virusforschung* 1965; **15**: 422-7.
- 377 140. Moore DL, Causey OR, Carey DE, et al. Arthropod-borne viral infections of man in Nigeria, 1964-  
378 1970. *Annals of tropical medicine and parasitology* 1975; **69**(1): 49-64.
- 379 141. Liu W, Sun FJ, Tong YG, Zhang SQ, Cao WC. Rift Valley fever virus imported into China from  
380 Angola. *Lancet Infect Dis* 2016; **16**(11): 1226.
- 381 142. Daubney R, Hudson JR, Garnham PC. Enzootic hepatitis or rift valley fever. An undescribed virus  
382 disease of sheep cattle and man from east africa. *The Journal of Pathology and Bacteriology* 1931; **34**(4): 545-  
383 79.
- 384 143. Sabin AB. Experimental studies on Phlebotomus (pappataci, sandfly) fever during World War II.  
385 *Archiv fur die gesamte Virusforschung* 1951; **4**(4): 367-410.
- 386 144. McMullan LK, Folk SM, Kelly AJ, et al. A new phlebovirus associated with severe febrile illness in  
387 Missouri. *The New England journal of medicine* 2012; **367**(9): 834-41.
- 388 145. Zhang YZ, Zhou DJ, Xiong Y, et al. Hemorrhagic fever caused by a novel tick-borne Bunyavirus in  
389 Huaiyangshan, China. *Zhonghua liu xing bing xue za zhi = Zhonghua liuxingbingxue zazhi* 2011; **32**(3): 209-20.
- 390 146. Grohmann GS, Glass RI, Pereira HG, et al. Enteric viruses and diarrhea in HIV-infected patients.  
391 Enteric Opportunistic Infections Working Group. *The New England journal of medicine* 1993; **329**(1): 14-20.
- 392 147. Rosen BI, Fang ZY, Glass RI, Monroe SS. Cloning of human picobirnavirus genomic segments and  
393 development of an RT-PCR detection assay. *Virology* 2000; **277**(2): 316-29.
- 394 148. Luo RH, Xie JQ, Chen YM, Yang SJ. Report of one case of hand-foot-mouth disease in human [Article  
395 in Chinese]. *New Medicine* 1999; **30**(03): 37-8.
- 396 149. Donia HA, Youssef BZ. Foot and mouth disease (FMD): serological investigation in some farms of  
397 Alexandria Governorate of Egypt. *The Journal of the Egyptian Public Health Association* 2002; **77**(3-4): 371-82.
- 398 150. Jonkers AH. Serosurvey of encephalomyocarditis virus neutralizing antibodies in southern Louisiana  
399 and Peruvian Indian populations. *Am J Trop Med Hyg* 1961; **10**: 593-8.
- 400 151. Feng R, Wei J, Zhang H, et al. National serosurvey of encephalomyocarditis virus in healthy people  
401 and pigs in China. *Archives of virology* 2015; **160**(12): 2957-64.
- 402 152. Dick GW, Best AM, et al. Mengo encephalomyelitis; a hitherto unknown virus affecting man. *Lancet*  
403 1948; **2**(6521): 286-9.
- 404 153. Jones MS, Lukashov VV, Ganac RD, Schnurr DP. Discovery of a novel human picornavirus in a stool  
405 sample from a pediatric patient presenting with fever of unknown origin. *Journal of clinical microbiology* 2007;  
406 **45**(7): 2144-50.
- 407 154. Xu ZQ, Cheng WX, Qi HM, Cui SX, Jin Y, Duan ZJ. New Saffold cardiovirus in children, China.  
408 *Emerg Infect Dis* 2009; **15**(6): 993-4.
- 409 155. Zoll J, Erkens Hulshof S, Lanke K, et al. Saffold virus, a human Theiler's-like cardiovirus, is  
410 ubiquitous and causes infection early in life. *PLoS Pathog* 2009; **5**(5): e1000416.
- 411 156. Dai XQ, Hua XG, Shan TL, Delwart E, Zhao W. Human cosavirus infections in children in China. *J*  
412 *Clin Virol* 2010; **48**(3): 228-9.
- 413 157. Kapusinszky B, Phan TG, Kapoor A, Delwart E. Genetic diversity of the genus Cosavirus in the family  
414 Picornaviridae: a new species, recombination, and 26 new genotypes. *PLoS One* 2012; **7**(5): e36685.
- 415 158. Yang Y, Ju A, Xu X, Cao X, Tao Y. A novel type of cosavirus from children with nonpolio acute  
416 flaccid paralysis. *Virology journal* 2016; **13**(1): 169.
- 417 159. Sickles GM, Dalldorf G. Serologic differences among strains of the Coxsackie group of viruses.  
418 *Proceedings of the Society for Experimental Biology and Medicine Society for Experimental Biology and*  
419 *Medicine* 1949; **72**(1): 30.
- 420 160. Xiao MH, Ye ZZ, Zhang ZL, Tian XQ, Zheng JM, Liu ZY. An epidemic of hand-foot-and-mouth  
421 disease due to Coxsackie A16 in Tianjin City [Article in Chinese]. *Tianjin Medical Journal* 1985; **06**(02): 355-  
422 7+2.
- 423 161. Wu JR, Che JL, Wu GQ, Lin SQ. Investigation on Coxsackie Virus Disease in Fujian Province [Article  
424 in Chinese]. *National Medical Journal of China* 1960; **46**(01): 40-8.

- 425 162. Patz IM, Measroch V, Gear J. Bornholm disease, pleurodynia or epidemic myalgia; an outbreak in the  
426 Transvaal associated with Coxsackie virus infection. *South African medical journal = Suid-Afrikaanse tydskrif*  
427 *vir geneeskunde* 1953; **27**(19): 397-402.
- 428 163. Flexner S, Lewis PA. The transmission of acute poliomyelitis to monkeys. *Journal of the American*  
429 *Medical Association* 1909; **LIII**(20): 1639-.
- 430 164. Hudson NP, Lennette EH. The Neutralization of Poliomyelitis Virus by the Serum of Liberian Negroes.  
431 *American journal of hygiene* 1933; **17**: 581-6.
- 432 165. Schieble JH, Fox VL, Lennette EH. A probable new human picornavirus associated with respiratory  
433 diseases. *American journal of epidemiology* 1967; **85**(2): 297-310.
- 434 166. Institute SEaSDPaT. Isolation and identification of acute hemorrhagic conjunctivitis virus in 1975  
435 [Article in Chinese]. *Chinese Journal of Ophthalmology* 1979; **15**(2): 90.
- 436 167. Mirkovic RR, Kono R, Yin-Murphy M, Sohler R, Schmidt NJ, Melnick JL. Enterovirus type 70: the  
437 etiologic agent of pandemic acute haemorrhagic conjunctivitis. *Bulletin of the World Health Organization* 1973;  
438 **49**(4): 341-6.
- 439 168. Moscovici C, Laplaca M, Maisel J, Kempe H. Studies of bovine enteroviruses. *American journal of*  
440 *veterinary research* 1961; **22**: 852-63.
- 441 169. Price WH. The isolation of a new virus associated with respiratory clinical disease in humans. *Proc*  
442 *Natl Acad Sci U S A* 1956; **42**(12): 892-6.
- 443 170. Health GIoMa. Investigation report on virus types in patients with cold in Guangzhou [Article in  
444 Chinese]. *Guangdong Medical Journal* 1975; (03): 2-6.
- 445 171. Taylor-Robinson D. Studies on some viruses (rhinoviruses) isolated from common colds. *Archiv fur die*  
446 *gesamte Virusforschung* 1963; **13**: 281-93.
- 447 172. Hamre D, Procknow JJ. Viruses isolated from natural common colds in the U.S.A. *British medical*  
448 *journal* 1961; **2**(5264): 1382-5.
- 449 173. Xiang Z, Gonzalez R, Xie Z, et al. Human rhinovirus group C infection in children with lower  
450 respiratory tract infection. *Emerg Infect Dis* 2008; **14**(10): 1665-7.
- 451 174. Briese T, Renwick N, Venter M, et al. Global distribution of novel rhinovirus genotype. *Emerg Infect*  
452 *Dis* 2008; **14**(6): 944-7.
- 453 175. Lamson D, Renwick N, Kapoor V, et al. MassTag polymerase-chain-reaction detection of respiratory  
454 pathogens, including a new rhinovirus genotype, that caused influenza-like illness in New York State during  
455 2004-2005. *J Infect Dis* 2006; **194**(10): 1398-402.
- 456 176. Lau SK, Yip CC, Tsoi HW, et al. Clinical features and complete genome characterization of a distinct  
457 human rhinovirus (HRV) genetic cluster, probably representing a previously undetected HRV species, HRV-C,  
458 associated with acute respiratory illness in children. *Journal of clinical microbiology* 2007; **45**(11): 3655-64.
- 459 177. Feinstone SM, Kapikian AZ, Purceli RH. Hepatitis A: detection by immune electron microscopy of a  
460 viruslike antigen associated with acute illness. *Science* 1973; **182**(4116): 1026-8.
- 461 178. College MRGoSFM, Hospital LoSSPs. Preliminary report on the examination of hepatitis A antigen  
462 particles by immunoelectron microscopy [Article in Chinese]. *Shanghai Medical Journal* 1978; (10): 13-5+65.
- 463 179. Szmuness W, Dienstag JL, Purcell RH, et al. The prevalence of antibody to hepatitis A antigen in  
464 various parts of the world: a pilot study. *American journal of epidemiology* 1977; **106**(5): 392-8.
- 465 180. Chhabra P, Payne DC, Szilagyi PG, et al. Etiology of viral gastroenteritis in children <5 years of age in  
466 the United States, 2008-2009. *J Infect Dis* 2013; **208**(5): 790-800.
- 467 181. Yang S, Zhang W, Shen Q, et al. Aichi virus strains in children with gastroenteritis, China. *Emerg*  
468 *Infect Dis* 2009; **15**(10): 1703-5.
- 469 182. Sdiri-Loulizi K, Gharbi-Khelifi H, de Rougemont A, et al. Acute infantile gastroenteritis associated  
470 with human enteric viruses in Tunisia. *Journal of clinical microbiology* 2008; **46**(4): 1349-55.
- 471 183. Ramos-Alvarez M, Sabin AB. Enteropathogenic viruses and bacteria; role in summer diarrheal diseases  
472 of infancy and early childhood. *Journal of the American Medical Association* 1958; **167**(2): 147-56.
- 473 184. Shan TL, Guo W, Cui L, et al. The first detection of human parechovirus infections in China. *J Clin*  
474 *Virol* 2009; **45**(4): 371-2.
- 475 185. Greninger AL, Runckel C, Chiu CY, et al. The complete genome of klassevirus - a novel picornavirus  
476 in pediatric stool. *Virology journal* 2009; **6**: 82.
- 477 186. Shan T, Wang C, Cui L, et al. Picornavirus salivirus/klassevirus in children with diarrhea, China.  
478 *Emerg Infect Dis* 2010; **16**(8): 1303-5.
- 479 187. Li L, Victoria J, Kapoor A, et al. A novel picornavirus associated with gastroenteritis. *Journal of*  
480 *virology* 2009; **83**(22): 12002-6.
- 481 188. Kayali G, Ortiz EJ, Chorazy ML, et al. Serologic evidence of avian metapneumovirus infection among  
482 adults occupationally exposed to turkeys. *Vector Borne Zoonotic Dis* 2011; **11**(11): 1453-8.
- 483 189. Falsey AR, Erdman D, Anderson LJ, Walsh EE. Human metapneumovirus infections in young and  
484 elderly adults. *J Infect Dis* 2003; **187**(5): 785-90.

- 485 190. Peiris JS, Tang WH, Chan KH, et al. Children with respiratory disease associated with  
486 metapneumovirus in Hong Kong. *Emerg Infect Dis* 2003; **9**(6): 628-33.
- 487 191. Madhi SA, Ludewick H, Abed Y, Klugman KP, Boivin G. Human metapneumovirus-associated lower  
488 respiratory tract infections among hospitalized human immunodeficiency virus type 1 (HIV-1)-infected and  
489 HIV-1-uninfected African infants. *Clinical infectious diseases : an official publication of the Infectious Diseases*  
490 *Society of America* 2003; **37**(12): 1705-10.
- 491 192. Chanock R, Roizman B, Myers R. Recovery from infants with respiratory illness of a virus related to  
492 chimpanzee coryza agent (CCA). I. Isolation, properties and characterization. *American journal of hygiene* 1957;  
493 **66**(3): 281-90.
- 494 193. Kun Number 323 Unit tCPsLA. Studies on the isolation and growth characteristics of respiratory  
495 syncytial virus [Article in Chinese]. *Acta Microbiologica Sinica* 1975; **15**(02): 125-32.
- 496 194. Doggett JE. Antibodies to respiratory syncytial virus in human sera from different regions of the world.  
497 *Bulletin of the World Health Organization* 1965; **32**(6): 849-53.
- 498 195. Florio L, Stewart MO, Mugrage ER. The Etiology of Colorado Tick Fever. *The Journal of*  
499 *experimental medicine* 1946; **83**(1): 1-10.
- 500 196. Yang JM, Yin GQ, Feng YH, Luo ZY, F. JJ, Zhang ZQ. Superinfection of colti virus and Japanese  
501 encephalitis virus [Article in Chinese]. *Journal of Nanjing Railway Medical college* 1996; **15**(03): 29.
- 502 197. Tomori O, Fabiyi A, Murphy F. Characterization of Orungo virus, an orbivirus from Uganda and  
503 Nigeria. *Archives of virology* 1976; **51**(4): 285-98.
- 504 198. Ramos-Alvarez M, Sabin AB. Characteristics of poliomyelitis and other enteric viruses recovered in  
505 tissue culture from healthy American children. *Proceedings of the Society for Experimental Biology and*  
506 *Medicine Society for Experimental Biology and Medicine* 1954; **87**(3): 655-61.
- 507 199. Zhao JM, Qiang BQ, Zhao TX, et al. Detection of diarrhoea viruses in children with acute  
508 gastroenteritis. *Chinese Journal of Experimental and Clinical Virology* 1995; (01): 45-9.
- 509 200. Malherbe H, Roux P, Kahn E. THE ROLE OF ENTEROPATHOGENIC BACTERIA AND VIRUSES  
510 IN ACUTE DIARRHOEAL DISORDERS OF INFANCY AND CHILDHOOD IN JOHANNESBURG. II.  
511 'NON-SPECIFIC' GASTRO-ENTERITIS. *South African medical journal = Suid-Afrikaanse tydskrif vir*  
512 *geneeskunde* 1963; **37**: 259-61.
- 513 201. Cheng P, Lau CS, Lai A, et al. A novel reovirus isolated from a patient with acute respiratory disease. *J*  
514 *Clin Virol* 2009; **45**(1): 79-80.
- 515 202. Kapikian AZ, Kim HW, Wyatt RG, et al. Recent advances in the aetiology of viral gastroenteritis. *Ciba*  
516 *Foundation symposium* 1976; (42): 273-309.
- 517 203. Pang QF, Qiu FX, Yu FR, Chen SZ. Rotavirus-the source of acute gastroenteritis in infants in autumn  
518 [Article in Chinese]. *Bulletin of Medical Research* 1979; (07): 26-7.
- 519 204. Eiden J, Vonderfecht S, Yolken RH. Evidence that a novel rotavirus-like agent of rats can cause  
520 gastroenteritis in man. *Lancet* 1985; **2**(8445): 8-11.
- 521 205. Hung T, Chen GM, Wang CG, et al. Waterborne outbreak of rotavirus diarrhoea in adults in China  
522 caused by a novel rotavirus. *Lancet* 1984; **1**(8387): 1139-42.
- 523 206. Nakata S, Estes MK, Graham DY, Wang SS, Gary GW, Melnick JL. Detection of antibody to group B  
524 adult diarrhea rotaviruses in humans. *Journal of clinical microbiology* 1987; **25**(5): 812-8.
- 525 207. Jiang B, Dennehy PH, Spangenberg S, Gentsch JR, Glass RI. First detection of group C rotavirus in  
526 fecal specimens of children with diarrhea in the United States. *J Infect Dis* 1995; **172**(1): 45-50.
- 527 208. Qiao H, Nilsson M, Abreu ER, et al. Viral diarrhea in children in Beijing, China. *Journal of medical*  
528 *virology* 1999; **57**(4): 390-6.
- 529 209. Sebata T, Steele AD. Human group C rotavirus identified in South Africa. *South African medical*  
530 *journal = Suid-Afrikaanse tydskrif vir geneeskunde* 1999; **89**(10): 1073-4.
- 531 210. Wang C, Hu C, Huang F, X. C, Hung T. A novel discovered rotavirus from adult acute diarrhoeal  
532 patients in China [Article in Chinese]. *Chinese Journal of Virology* 1987; **03**(04): 321-5+411.
- 533 211. Xu PT, Wang YM, Zuo JM, Lin JW, Xu PM. New orbiviruses isolated from patients with unknown  
534 fever and encephalitis in Yunnan Province [Article in Chinese]. *Chinese Journal of Virology* 1990; **06**(01): 27-  
535 33+100.
- 536 212. Poiesz BJ, Ruscetti FW, Gazdar AF, Bunn PA, Minna JD, Gallo RC. Detection and isolation of type C  
537 retrovirus particles from fresh and cultured lymphocytes of a patient with cutaneous T-cell lymphoma. *Proc*  
538 *Natl Acad Sci U S A* 1980; **77**(12): 7415-9.
- 539 213. Williams CK, Alabi GO, Junaid TA, et al. Human T cell leukaemia virus associated  
540 lymphoproliferative disease: report of two cases in Nigeria. *British medical journal (Clinical research ed)* 1984;  
541 **288**(6429): 1495-6.
- 542 214. Kalyanaraman VS, Sarngadharan MG, Robert-Guroff M, Miyoshi I, Golde D, Gallo RC. A new  
543 subtype of human T-cell leukemia virus (HTLV-II) associated with a T-cell variant of hairy cell leukemia.  
544 *Science* 1982; **218**(4572): 571-3.



- 545 215. Ma Y, Zheng S, Wang N, et al. Epidemiological analysis of HTLV-1 and HTLV-2 infection among  
546 different population in Central China. *PLoS One* 2013; **8**(6): e66795.
- 547 216. Delaporte E, Louwagie J, Peeters M, et al. Evidence of HTLV-II infection in central Africa. *AIDS*  
548 (*London, England*) 1991; **5**(6): 771-2.
- 549 217. Calattini S, Chevalier SA, Duprez R, et al. Discovery of a new human T-cell lymphotropic virus  
550 (HTLV-3) in Central Africa. *Retrovirology* 2005; **2**: 30.
- 551 218. Safai B, Sarngadharan MG, Groopman JE, et al. Seroepidemiological studies of human T-lymphotropic  
552 retrovirus type III in acquired immunodeficiency syndrome. *Lancet* 1984; **1**(8392): 1438-40.
- 553 219. Chang RS, Chan RC, French GL, et al. HTLV-III antibody testing in Hong Kong. *Jama* 1986; **256**(1):  
554 41.
- 555 220. Brun-Vezinet F, Rouzioux C, Montagnier L, et al. Prevalence of antibodies to lymphadenopathy-  
556 associated retrovirus in African patients with AIDS. *Science* 1984; **226**(4673): 453-6.
- 557 221. (CDC) CfDC. AIDS due to HIV-2 infection--New Jersey. *MMWR Morb Mortal Wkly Rep* 1988; **37**(3):  
558 33-5.
- 559 222. Yan YS, Zheng ZS, Chen G, Zheng J, Yan PP, Shao YM. Confirmation of the first HIV-2 case in  
560 China [Article in Chinese]. *Journal of Chinese AIDS&STD Prevention and Control* 2000; **06**(01): 16-8.
- 561 223. Kanki PJ, Barin F, M'Boup S, et al. New human T-lymphotropic retrovirus related to simian T-  
562 lymphotropic virus type III (STLV-IIIAGM). *Science* 1986; **232**(4747): 238-43.
- 563 224. Khabbaz RF, Rowe T, Murphey-Corb M, et al. Simian immunodeficiency virus needlestick accident in  
564 a laboratory worker. *Lancet* 1992; **340**(8814): 271-3.
- 565 225. Rua R, Betsem E, Calattini S, Saib A, Gessain A. Genetic characterization of simian foamy viruses  
566 infecting humans. *Journal of virology* 2012; **86**(24): 13350-9.
- 567 226. Achong BG, Mansell PW, Epstein MA. A new human virus in cultures from a nasopharyngeal  
568 carcinoma. *The Journal of pathology* 1971; **103**(2): P18.
- 569 227. Huang F, Wang H, Jing S, Zeng W. Simian foamy virus prevalence in Macaca mulatta and zookeepers.  
570 *AIDS research and human retroviruses* 2012; **28**(6): 591-3.
- 571 228. Meredith CD, Prossouw AP, Koch H. An unusual case of human rabies thought to be of chiropteran  
572 origin. *South African medical journal = Suid-Afrikaanse tydskrif vir geneeskunde* 1971; **45**(28): 767-9.
- 573 229. Liu Y, Zhang S, Zhao J, Zhang F, Hu R. Isolation of Irkut virus from a Murina leucogaster bat in China.  
574 *PLoS neglected tropical diseases* 2013; **7**(3): e2097.
- 575 230. Familusi JB, Osunkoya BO, Moore DL, Kemp GE, Fabiyi A. A fatal human infection with Mokola  
576 virus. *Am J Trop Med Hyg* 1972; **21**(6): 959-63.
- 577 231. Black SP, Powers LM. History of Rabies in Southern California. *Cal State J Med* 1910; **8**(11): 369-72.
- 578 232. Wu BQ. Report of four cases of rabies encephalitis [Article in Chinese]. *New Medicine* 1981; **12**(07):  
579 357-8.
- 580 233. Wilhelm N, Alexis T. Rabies in South Africa: Occurrence and Distribution of Cases During 1932.  
581 *Onderstepoort Journal of Veterinary Science and Animal Industry* 1933; **1**: 51-6.
- 582 234. Grard G, Fair JN, Lee D, et al. A novel rhabdovirus associated with acute hemorrhagic fever in central  
583 Africa. *PLoS Pathog* 2012; **8**(9): e1002924.
- 584 235. Stremlau MH, Andersen KG, Folarin OA, et al. Discovery of novel rhabdoviruses in the blood of  
585 healthy individuals from West Africa. *PLoS neglected tropical diseases* 2015; **9**(3): e0003631.
- 586 236. Patterson WC, Mott LO, Jenney EW. A study of vesicular stomatitis in man. *Journal of the American*  
587 *Veterinary Medical Association* 1958; **133**(1): 57-62.
- 588 237. Hanson RP, Rasmussen AF, Jr., Brandly CA, Brown JW. Human infection with the virus of vesicular  
589 stomatitis. *The Journal of laboratory and clinical medicine* 1950; **36**(5): 754-8.
- 590 238. CDC. Chikungunya fever diagnosed among international travelers--United States, 2005-2006. *MMWR*  
591 *Morb Mortal Wkly Rep* 2006; **55**(38): 1040-2.
- 592 239. Ross RW. The Newala epidemic. III. The virus: isolation, pathogenic properties and relationship to the  
593 epidemic. *The Journal of hygiene* 1956; **54**(2): 177-91.
- 594 240. Howitt B. Recovery of the Virus of Equine Encephalomyelitis from the Brain of a Child. *Science* 1938;  
595 **88**(2289): 455-6.
- 596 241. Ehrenkranz NJ, Sinclair MC, Buff E, Lyman DO. The natural occurrence of Venezuelan equine  
597 encephalitis in the United States. *The New England journal of medicine* 1970; **282**(6): 298-302.
- 598 242. Li XD, Qiu FX, Yang H, Rao YN, Calisher CH. Isolation of Getah virus from mosquitos collected on  
599 Hainan Island, China, and results of a serosurvey. *The Southeast Asian journal of tropical medicine and public*  
600 *health* 1992; **23**(4): 730-4.
- 601 243. Meehan PJ, Wells DL, Paul W, et al. Epidemiological features of and public health response to a St.  
602 Louis encephalitis epidemic in Florida, 1990-1. *Epidemiology and infection* 2000; **125**(1): 181-8.

- 603 244. Tesh RB, Watts DM, Russell KL, et al. Mayaro virus disease: an emerging mosquito-borne zoonosis in  
604 tropical South America. *Clinical infectious diseases : an official publication of the Infectious Diseases Society*  
605 *of America* 1999; **28**(1): 67-73.
- 606 245. Kokernot RH, McIntosh BM, Worth CB. Ndumu virus, a hitherto unknown agent, isolated from  
607 culicine mosquitoes collected in northern Natal. Union of South Africa. *Am J Trop Med Hyg* 1961; **10**: 383-6.
- 608 246. Williams MC, Woodall JP. O'nyong-nyong fever: an epidemic virus disease in East Africa. II. Isolation  
609 and some properties of the virus. *Transactions of the Royal Society of Tropical Medicine and Hygiene* 1961; **55**:  
610 135-41.
- 611 247. Xu CH, Peng YF, Bai ZJ, et al. Seroepidemiological survey of arbovirus in Hainan Province in 1998  
612 [Article in Chinese]. *Chinese Journal of Epidemiology* 1999; **20**(04): 20.
- 613 248. Mathiot CC, Grimaud G, Garry P, et al. An outbreak of human Semliki Forest virus infections in  
614 Central African Republic. *Am J Trop Med Hyg* 1990; **42**(4): 386-93.
- 615 249. Taylor RM, Hurlbut HS, Work TH, Kingston JR, Frothingham TE. Sindbis virus: a newly recognized  
616 arthropodtransmitted virus. *Am J Trop Med Hyg* 1955; **4**(5): 844-62.
- 617 250. Casals J, Curnen EC, Thomas L. Venezuelan Equine Encephalomyelitis in Man. *The Journal of*  
618 *experimental medicine* 1943; **77**(6): 521-30.
- 619 251. Habel K. Transmission of Rubella to Macacus mulatta Monkeys. *Public Health Reports (1896-1970)*  
620 1942; **57**(31): 1126-39.
- 621 252. He NX, Xu TZ, Ma JY, et al. Isolation of rubella virus [Article in Chinese]. *Journal of Zhejiang*  
622 *University(Medical Sciences)* 1979; **8**(04): 169-72+217.
- 623 253. Selzer G. VIRUS ISOLATION, INCLUSION BODIES, AND CHROMOSOMES IN A RUBELLA-  
624 INFECTED HUMAN EMBRYO. *Lancet* 1963; **2**(7303): 336-7.
- 625 254. Rizzetto M, Shih JW, Gocke DJ, Purcell RH, Verme G, Gerin JL. Incidence and significance of  
626 antibodies to delta antigen in hepatitis B virus infection. *Lancet* 1979; **2**(8150): 986-90.
- 627 255. Rizzetto M, Purcell RH, Gerin JL. Epidemiology of HBV-associated delta agent: geographical  
628 distribution of anti-delta and prevalence in polytransfused HBsAg carriers. *Lancet* 1980; **1**(8180): 1215-8.
- 629 256. Crocchiolo PR, Caredda F, D'Arminio Monforte A, et al. The aetiology of acute hepatitis in Zimbabwe.  
630 *Transactions of the Royal Society of Tropical Medicine and Hygiene* 1984; **78**(4): 514-8.

631
